# Supplementary material for: Case based rubella surveillance in Abia State, South East Nigeria, 2007–2011
Source: PeerJ. 2014 Sep 30;2:e580. doi: 10.7717/peerj.580 (PMC4183961; doi:10.7717/peerj.580)
Supplement: Supplemental Information 1 [file peerj-02-580-s001.xlsx]

## Sheet: Rubella_Measles data
CountryCode	DataType	DateReceivedNatlevel	AgeInyears	AgeInmonths	Sex	Urbanrural	DateSeenHealthFacility	NumberOfVaccinedoses	DateHealthfacilitynotified	DateOfLastvaccination	DateOfonset	Inoutpatient	DateSentFormtodistrict	DateSpecimencollected	DateSpecimenSenttolab	DateLabReceivedSpecimen	MeaslesIgm	RubellaIgm	DateLabSentResulttodistrict	Age	DateDistrictRecLabResults	ProvinceofResidence
NIE	Case-based	2009-10-26	0	10	1	U	2009-10-15	1	2009-10-15	2009-09-11	2009-10-13	2		2009-10-16	2009-10-17	2009-10-18	2	2	2009-10-23	0.83	2009-10-23	Abia
NIE	Case-based	2009-10-26	6	0	1	R	2009-10-16	2	2009-10-17	2008-12-10	2009-10-15	2	2009-10-19	2009-10-19	2009-10-20	2009-10-21	2	2	2009-10-23	6	2009-10-23	Abia
NIE	Case-based	2009-10-26	14	6	2	R	2009-10-16	0	2009-10-17		2009-10-15	2	2009-10-19	2009-10-19	2009-10-20	2009-10-21	2	1	2009-10-23	14.5	2009-10-23	Abia
NIE	Case-based	2009-10-26	8	10	1	U	2009-10-15	1	2009-10-15	2002-09-15	2009-10-13	2		2009-10-16	2009-10-17	2009-10-18	2	2	2009-10-23	8.83	2009-10-23	Abia
NIE	Case-based	2009-10-27	2	1	2	U	2009-08-25	1	2009-08-26	2008-04-25	2009-08-23	2		2009-08-27	2009-08-29	2009-08-29	2	2	2009-09-01	2.08	2009-09-01	Abia
NIE	Case-based	2009-10-27	6	2	2	U	2009-08-17	3	2009-08-17	2008-03-13	2009-08-12	2	2009-08-18	2009-08-17	2009-08-18	2009-08-19	2	1	2009-08-24	6.17	2009-08-24	Abia
NIE	Case-based	2009-08-12	10	6	2	R	2009-05-18	2	2009-05-19	2006-02-13	2009-05-15	2		2009-05-18	2009-05-25	2009-05-27	2	2	2009-05-28	10.5	2009-05-28	Abia
NIE	Case-based	2009-08-17	14	4	1	R	2009-06-29	1	2009-06-30		2009-06-21	2		2009-07-05	2009-07-06	2009-07-07	2	2	2009-07-07	14.33	2009-07-07	Abia
NIE	Case-based	2009-08-17	11	1	2	R	2009-08-02	2	2009-08-07	2008-12-14	2009-08-02	2		2009-08-07	2009-08-08	2009-08-09	2	2	2009-08-11	11.08	2009-08-11	Abia
NIE	Case-based	2009-09-15	1	2	1	R	2009-08-29	2	2009-08-29	2009-06-01	2009-08-25	2		2009-09-02	2009-09-03	2009-09-03	2	3	2009-09-07	1.17	2009-09-07	Abia
NIE	Case-based	2009-09-15	63	0	2	R	2009-08-19		2009-08-19		2009-07-31	2		2009-08-20	2009-08-22	2009-08-23	2	2	2009-08-26	63	2009-08-26	Abia
NIE	Case-based	2009-09-15	1	7	1	U	2009-09-03	1	2009-09-03	2008-10-28	2009-08-31	2		2009-09-03	2009-09-04	2009-09-05	2	2	2009-09-07	1.58	2009-09-07	Abia
NIE	Case-based	2009-09-15	2	9	2	U	2009-09-03	1	2009-09-03	2009-08-26	2009-08-30	2		2009-09-03	2009-09-04	2009-09-05	2	2	2009-09-07	2.75	2009-09-07	Abia
NIE	Case-based		3	7	2	R		0	2007-03-29		2007-03-26	2		2007-03-30	2007-03-31	2007-03-31	2	1	2007-04-05	3.58	2007-04-05	Abia
NIE	Case-based	2007-03-29	2	7	1	R	2007-03-28	2	2007-03-29	2007-01-09	2007-03-26	2		2007-03-31	2007-04-02	2007-04-02	2	2	2007-04-14	2.58	2007-04-14	Abia
NIE	Case-based	2007-04-01	2	8	1	U	2007-03-30	2	2007-03-31	2006-10-07	2007-03-28	2	2007-04-01	2007-04-01	2007-04-02	2007-04-02	2	2	2007-04-14	2.67	2007-04-14	Abia
NIE	Case-based	2010-03-24	4	2	F	R	2010-03-04	1	2010-03-04	2006-10-11	2010-03-03	2		2010-03-08	2010-03-11	2010-03-11	2	1	2010-03-12	4.17	2010-03-12	Abia
NIE	Case-based	2009-08-27	3	5	1	U	2009-08-04	3	2009-08-04	2009-12-30	2009-08-02	2		2009-08-04	2009-08-05	2009-08-06	2	2	2009-08-06	3.42	2009-08-06	Abia
NIE	Case-based	2009-08-27	1	4	1	R	2009-08-08	1	2009-08-12	2009-01-21	2009-08-05	2		2009-08-18	2009-08-20	2009-08-21	2	2	2009-08-24	1.33	2009-08-24	Abia
NIE	Case-based	2009-08-27	20	3	1	R	2009-08-13		2009-08-13		2009-08-12	2		2009-08-18	2009-08-20	2009-08-21	2	3	2009-08-24	20.25	2009-08-24	Abia
NIE	Case-based	2009-08-27	6	4	1	U	2009-08-03		2009-08-03		2009-08-01	2		2009-08-04	2009-08-06	2009-08-06	2	1	2009-08-06	6.33	2009-08-06	Abia
NIE	Case-based	2009-09-11	0	7	2	R	2009-07-18		2009-07-22		2009-07-15	2		2009-08-07	2009-08-07	2009-08-12	2	3	2009-08-13	0.58	2009-08-13	Abia
NIE	Case-based	2009-09-14	6	9	2	R	2009-07-14	2	2009-07-16	2006-08-14	2009-07-12	2		2009-08-06	2009-08-06	2009-08-12	2	5	2009-08-13	6.75	2009-08-13	Abia
NIE	Case-based		8	2	1	U	2007-06-26	1	2007-06-26	2000-02-20	2007-06-19	2		2007-06-26	2007-06-27	2007-06-27	2	2	2007-07-07	8.17	2007-07-07	Abia
NIE	Case-based	2009-09-22	20	6	2	R	2009-09-07	1	2009-09-08	1989-12-05	2009-09-04	2	2009-09-08	2009-09-13	2009-09-14	2009-09-14	2	2	2009-09-17	20.5	2009-09-17	Abia
NIE	Case-based		1	0	2	U		9	2007-03-09	2006-12-11	2007-03-03	2		2007-03-10	2007-03-10	2007-03-11	2	2	2007-03-23	1	2007-03-23	Abia
NIE	Case-based		1	10	1	U		0	2007-03-09		2007-03-06	2		2007-03-10	2007-03-10	2007-03-11	2	1	2007-03-23	1.83		Abia
NIE	Case-based		0	10	1	R	2007-03-12	0	2007-03-12		2007-03-11	2		2007-03-11	2007-03-13	2007-03-14	2	1	2007-03-25	0.83	2007-03-25	Abia
NIE	Case-based	2007-02-13	7	2	1	R	2007-02-08	99	2007-02-09	2006-10-03	2007-02-08	2		2007-02-14	2007-02-14	2007-02-15	2	1	2007-02-16	7.17	2007-02-16	Abia
NIE	Case-based		3	0	1	R	2007-01-20	2	2007-01-21	2006-10-18	2007-01-18	2		2007-01-31	2007-01-31	2007-02-01	2	2	2007-02-04	3	2007-02-04	Abia
NIE	Case-based	2007-01-31	0	7	1	U	2007-01-28	0	2007-01-29		2007-01-28	2		2007-01-30	2007-02-01	2007-02-02	2	2	2007-02-04	0.58	2007-02-04	Abia
NIE	Case-based		1	6	2			1			2006-09-16	2		2006-09-26	2006-09-26	2006-09-27	2	2	2006-09-30	1.5		Abia
NIE	Line list		2	0	2			1			2006-09-05	2		2006-09-26	2006-09-26	2006-09-27	1	4	2006-09-30	2		Abia
NIE	Line list		0	0	2			1			2006-09-12	2		2006-09-26	2006-09-26	2006-09-27	1	4	2006-09-30	0		Abia
NIE	Line list		0	10				0			2006-02-16	2										Abia
NIE	Line list			8				0			2006-02-13	2										Abia
NIE	Line list			9				0			2006-02-18	2										Abia
NIE	Line list			11				0			2006-02-09	2										Abia
NIE	Line list			10				0			2006-02-04	2										Abia
NIE	Line list		2					0			2006-02-04	2										Abia
NIE	Line list		1					1			2006-02-06	2										Abia
NIE	Line list		3	2	2			0			2006-08-14	2		2006-08-15	2006-08-16	2006-08-17	1	4	2006-08-21	3.17		Abia
NIE	Line list		0	8	1			0			2006-08-07	2		2006-08-15	2006-08-16	2006-08-17	1	4	2006-08-21	0.67		Abia
NIE	Line list		6	11	2			0			2006-08-13	2		2006-08-15	2006-08-16	2006-08-17	1	4	2006-08-21	6.92		Abia
NIE	Line list		4	4	2			1			2006-08-11	2		2006-08-15	2006-08-16	2006-08-17	1	4	2006-08-21	4.33		Abia
NIE	Line list		0	10	1			1			2006-08-06	2		2006-08-15	2006-08-16	2006-08-17	1	4	2006-08-21	0.83		Abia
NIE	Line list			4				0				2										Abia
NIE	Line list		3					0				2										Abia
NIE	Line list		5					0				2										Abia
NIE	Line list			3				0				2										Abia
NIE	Line list		5					0				2										Abia
NIE	Line list		4					0				2										Abia
NIE	Line list		2					0				2										Abia
NIE	Line list		3					0				2										Abia
NIE	Line list		6					0				2										Abia
NIE	Line list		3					0				2										Abia
NIE	Line list		5					0				2										Abia
NIE	Line list		2					0				2										Abia
NIE	Line list		1					0				2										Abia
NIE	Line list			10				0				2										Abia
NIE	Line list		3					0				2										Abia
NIE	Line list		2					0				2										Abia
NIE	Line list		2	2				1			2006-03-12	2										Abia
NIE	Line list		4					1			2006-03-05	2										Abia
NIE	Line list			7				1			2006-03-20	2										Abia
NIE	Line list							9			2006-03-20	1										Abia
NIE	Line list		1	5				0			2006-06-12	2										Abia
NIE	Line list		4					0			2006-06-17	2										Abia
NIE	Line list		6					0			2006-06-18	2										Abia
NIE	Case-based		3					1			2006-06-08	2										Abia
NIE	Line list		4					0			2006-06-06	2										Abia
NIE	Line list		2					1			2006-06-09	2										Abia
NIE	Line list		1	2				1			2006-06-08	2										Abia
NIE	Line list		2					1			2006-06-18	2										Abia
NIE	Line list			4				0			2006-06-22	2										Abia
NIE	Line list		16					0			2006-06-14	2										Abia
NIE	Line list		1	7				1			2006-06-14	2										Abia
NIE	Line list		2					1			2006-06-22	2										Abia
NIE	Line list			8				0			2006-06-27	2										Abia
NIE	Line list			10				0			2006-06-18	2										Abia
NIE	Line list			7				0			2006-07-09	2										Abia
NIE	Line list		3					1			2006-07-12	2										Abia
NIE	Line list		1	5				1			2006-07-13	2										Abia
NIE	Line list			10				0			2006-07-15	2										Abia
NIE	Line list			8				1			2006-08-09	2										Abia
NIE	Line list		1					1			2006-07-09	1										Abia
NIE	Line list			9				0			2006-07-12	1										Abia
NIE	Line list			8				1			2006-08-09	2										Abia
NIE	Line list			5				1			2006-07-22	2										Abia
NIE	Line list			2				1			2006-08-17	2										Abia
NIE	Line list			6				0			2006-08-18	2										Abia
NIE	Line list			3				0			2006-08-20	2										Abia
NIE	Line list			2				0			2006-08-21	1										Abia
NIE	Line list			3				0			2006-08-11	1										Abia
NIE	Line list			1				0			2006-08-12	1										Abia
NIE	Line list							1			2006-08-06	2										Abia
NIE	Line list							1			2006-08-14	2										Abia
NIE	Line list			3				1			2006-07-31	2										Abia
NIE	Line list			5				1			2006-08-08	2										Abia
NIE	Line list			6				1			2006-08-09	2										Abia
NIE	Line list			7				1			2006-08-13	2										Abia
NIE	Line list			3				1			2006-08-12	2										Abia
NIE	Line list			4				1			2006-08-16	2										Abia
NIE	Line list		1					1			2006-08-07	2										Abia
NIE	Line list		2					1			2006-08-10	2										Abia
NIE	Line list		1					1			2006-08-16	2										Abia
NIE	Line list		3					1			2006-08-13	2										Abia
NIE	Line list			11				1			2006-08-06	2										Abia
NIE	Line list			10				1			2006-08-17	2										Abia
NIE	Line list		22					1			2006-08-03	2										Abia
NIE	Line list		1	2				0			2006-08-25	2										Abia
NIE	Line list		4					0			2006-07-29	2										Abia
NIE	Line list		3	5				1			2006-08-08	2										Abia
NIE	Line list		1	8				1			2006-08-08	2										Abia
NIE	Line list		1					1			2006-08-08	2										Abia
NIE	Line list		4					1			2006-08-08	2										Abia
NIE	Line list		1	8				1			2006-08-08	2										Abia
NIE	Line list			11				0			2006-08-08	2										Abia
NIE	Line list		2					0			2006-08-08	2										Abia
NIE	Line list		1	6				0			2006-08-08	2										Abia
NIE	Line list			8				0			2006-08-08	2										Abia
NIE	Line list			9				0			2006-08-08	2										Abia
NIE	Line list			6				0			2006-08-08	2										Abia
NIE	Line list			10				0			2006-08-08	2										Abia
NIE	Line list			7				0			2006-08-08	2										Abia
NIE	Line list			10				0			2006-08-09	2										Abia
NIE	Line list		2	7				0			2006-08-04	2										Abia
NIE	Line list		3	6				0			2006-08-06	2										Abia
NIE	Line list		7					0			2006-08-05	2										Abia
NIE	Line list		3	4				0			2006-08-08	2										Abia
NIE	Line list		4					0			2006-08-07	2										Abia
NIE	Line list		2					0			2006-08-12	2										Abia
NIE	Line list			8				0			2006-08-13	2										Abia
NIE	Line list		1					0			2006-08-09	2										Abia
NIE	Line list		1					0			2006-08-09	2										Abia
NIE	Line list		1	9				0			2006-08-09	2										Abia
NIE	Line list			8				0			2006-08-11	2										Abia
NIE	Line list			9				0			2006-08-09	2										Abia
NIE	Line list							9			2006-03-19	2										Abia
NIE	Line list							9			2006-03-18	2										Abia
NIE	Line list		2	1				9			2006-03-06	2										Abia
NIE	Line list		6					9			2006-03-13	2										Abia
NIE	Line list		3					9			2006-03-09	1										Abia
NIE	Line list		5					9			2006-03-07	2										Abia
NIE	Line list		4					9			2006-03-13	2										Abia
NIE	Line list		5					9			2006-03-13	2										Abia
NIE	Case-based		2	0	1			1			2006-09-16	2		2006-09-26	2006-09-26	2006-09-27	2	2	2006-09-30	2		Abia
NIE	Case-based		4	1	2			1			2006-09-13	2		2006-09-26	2006-09-26	2006-09-27	2	2	2006-09-30	4.08		Abia
NIE	Line list		3					1			2006-03-03	2										Abia
NIE	Line list		2	6				1			2006-03-22	2										Abia
NIE	Line list		1	3				0			2006-03-09	2										Abia
NIE	Line list		2					0			2006-03-09	2										Abia
NIE	Line list							2			2006-03-05	2										Abia
NIE	Line list							2			2006-03-05	2										Abia
NIE	Line list							2			2006-03-04	2										Abia
NIE	Line list							2			2006-03-04	2										Abia
NIE	Line list							0			2006-02-28	2										Abia
NIE	Line list			6				0			2006-02-21	2										Abia
NIE	Line list		4	6				0			2006-03-02	2										Abia
NIE	Line list			9				0			2006-03-01	2										Abia
NIE	Line list		4					0			2006-03-21	2										Abia
NIE	Line list		3					0			2006-03-18	2										Abia
NIE	Line list		4					0			2006-03-16	2										Abia
NIE	Line list		4					0			2006-03-19	2										Abia
NIE	Line list			5				0			2006-03-19	2										Abia
NIE	Line list		2					0			2006-03-12	2										Abia
NIE	Line list		4					0			2006-03-19	2										Abia
NIE	Line list		1					0			2006-03-12	2										Abia
NIE	Line list		2					0			2006-03-19	2										Abia
NIE	Line list		4					0			2006-03-14	2										Abia
NIE	Line list		4					0			2006-03-19	2										Abia
NIE	Line list		4					0			2006-03-19	2										Abia
NIE	Line list		1	2				0			2006-03-21	2										Abia
NIE	Line list		3					0			2006-03-13	2										Abia
NIE	Line list		3					0			2006-03-13	2										Abia
NIE	Line list		4					1			2006-03-18	2										Abia
NIE	Line list		4					0			2006-03-18	2										Abia
NIE	Line list		3					1			2006-03-18	2										Abia
NIE	Line list		3					0			2006-03-16	2										Abia
NIE	Line list		2					0			2006-03-21	2										Abia
NIE	Line list		3					0			2006-03-19	2										Abia
NIE	Line list		6					0			2006-03-20	2										Abia
NIE	Line list		12					0			2006-03-19	2										Abia
NIE	Line list		2					0			2006-03-20	2										Abia
NIE	Line list		1	3				0			2006-03-16	2										Abia
NIE	Line list		1	4				0			2006-03-21	2										Abia
NIE	Line list			7				0			2006-03-14	2										Abia
NIE	Line list		2					0			2006-03-21	2										Abia
NIE	Line list		4					0			2006-03-19	2										Abia
NIE	Line list		9					0			2006-03-21	2										Abia
NIE	Line list		5					0			2006-03-15	2										Abia
NIE	Case-based		7					1			2006-03-20	2										Abia
NIE	Line list		10					1			2006-03-17	2										Abia
NIE	Line list		1	3				0			2006-03-09	2										Abia
NIE	Line list		2					0			2006-03-09	2										Abia
NIE	Line list		2					0			2006-04-15	2										Abia
NIE	Line list			9				0			2006-04-17	2										Abia
NIE	Line list		3					1			2006-04-20	2										Abia
NIE	Line list		2	6				0			2006-04-18	2										Abia
NIE	Case-based		1	2	F			1			2006-04-21	2										Abia
NIE	Line list		2	11				1			2006-04-11	2										Abia
NIE	Case-based		5	3	F			1			2006-04-05	2										Abia
NIE	Line list		1	8				1			2006-04-19	2										Abia
NIE	Line list			10				0			2006-04-10	1										Abia
NIE	Line list		2					0			2006-03-15	1										Abia
NIE	Line list		11					1			2006-04-01	2										Abia
NIE	Case-based		1					0			2006-04-01	2										Abia
NIE	Line list		1	7				0			2006-04-02	1										Abia
NIE	Line list			7				0			2006-03-27	2										Abia
NIE	Case-based			11				0			2006-03-15	2										Abia
NIE	Line list			11				0			2006-04-16	2										Abia
NIE	Line list			7				1			2006-04-29	2										Abia
NIE	Line list		3	11				0			2006-04-29	2										Abia
NIE	Case-based	2008-08-06	1	2	1	U	2008-07-22	1	2008-07-23	2008-02-13	2008-07-20	2	2008-07-25	2008-07-25	2008-07-29	2008-08-03	2	2	2008-08-04	1.17	2008-08-03	Abia
NIE	Case-based	2008-08-06	3	9	2	R	2008-07-23	0	2008-07-23		2008-07-22	2		2008-07-23	2008-08-03	2008-08-03	2	2	2008-08-04	3.75	2008-08-03	Abia
NIE	Case-based	2008-07-30	5	5	M	R	2008-07-21	2	2008-07-22	2006-10-04	2008-07-21	2		2008-07-24	2008-07-25	2008-07-25	2	2	2008-07-29	5.42		Abia
NIE	Case-based	2008-07-30	1	0	2	R	2008-07-23	1	2008-07-24	2008-05-01	2008-07-22	2		2008-07-24	2008-07-25	2008-07-25	2	2	2008-07-29	1	2008-07-25	Abia
NIE	Case-based	2008-07-30	1	4	1	R	2008-07-17	1	2008-07-17	2007-11-26	2008-07-15	2	2008-07-21	2008-07-17	2008-07-22	2008-07-22	2	5	2008-07-24	1.33	2008-07-22	Abia
NIE	Case-based	2008-07-30	5	0	1	R	2008-07-14	2	2008-07-14	2005-06-02	2008-07-14	2	2008-07-21	2008-07-21	2008-07-22	2008-07-22	2	5	2008-07-24	5	2008-07-22	Abia
NIE	Case-based	2008-08-27	1	3	1	U	2008-08-07	1	2008-08-07	2008-01-08	2008-08-05	2		2008-08-08	2008-08-08	2008-08-09	2	1	2008-08-11	1.25	2008-08-09	Abia
NIE	Case-based	2008-08-27	0	8	1	R	2008-08-02	0	2008-08-02		2008-07-28	2	2008-08-02	2008-08-04	2008-08-08	2008-08-09	2	2	2008-08-11	0.67	2008-08-09	Abia
NIE	Case-based	2008-08-27	5	2	1	R	2008-07-25	0	2008-07-28		2008-07-24	2	2008-08-03	2008-08-08	2008-08-08	2008-08-09	2	2	2008-08-11	5.17	2008-08-09	Abia
NIE	Case-based	2009-10-12	1	9	1	R	2009-09-08	1	2009-09-08	2008-10-02	2009-09-05	2		2009-09-10	2009-09-10	2009-09-12	2	2	2009-09-14	1.75	2009-09-14	Abia
NIE	Case-based	2009-10-12	1	4	1	R	2009-09-07	1	2009-09-07	2009-03-05	2009-09-05	2	2009-09-10	2009-09-10	2009-09-12	2009-09-12	2	2	2009-09-14	1.33	2009-09-14	Abia
NIE	Case-based	2009-10-12	2	0	1	R	2009-09-03	1	2009-09-07		2009-09-03	2	2009-09-10	2009-09-10	2009-09-10	2009-09-12	2	2	2009-09-14	2	2009-09-14	Abia
NIE	Case-based	2009-12-02	9	2	2	R	2009-11-09	2	2009-11-10	2006-06-14	2009-11-07	2		2009-11-11	2009-11-16	2009-11-17	2	2	2009-12-02	9.17	2009-12-02	Abia
NIE	Case-based	2009-12-02	1	7	2	R	2009-11-09		2009-11-10		2009-11-09	2		2009-11-16	2009-11-17	2009-11-17	2	2	2009-12-02	1.58	2009-12-02	Abia
NIE	Case-based	2009-12-02	2	0	1	R	2009-11-11		2009-11-12		2009-11-10	2		2009-11-15	2009-11-16	2009-11-16	2	2	2009-12-02	2	2009-12-02	Abia
NIE	Case-based	2009-12-02	3	3	1	U	2009-11-25	1	2009-11-25	2007-05-25	2009-11-23	2		2009-11-25	2009-11-26	2009-11-26	2	2	2009-12-08	3.25	2009-12-08	Abia
NIE	Case-based	2009-12-02	1	3	2	U	2009-11-16	1	2009-11-16	2009-05-19	2009-11-14	2		2009-11-16	2009-11-17	2009-11-18	2	2	2009-12-02	1.25	2009-12-02	Abia
NIE	Case-based	2009-12-02	1	4	1	R	2009-11-10		2009-11-11		2009-11-09	2		2009-11-16	2009-11-17	2009-11-18	2	2	2009-12-02	1.33	2009-12-02	Abia
NIE	Case-based	2009-12-02	9	2	2	R	2009-11-26		2009-11-26		2009-11-03	2		2009-11-27	2009-11-28	2009-11-29	2	2	2009-12-08	9.17	2009-12-08	Abia
NIE	Case-based	2009-12-02	2	4	2	R	2009-11-11	1	2009-11-12	2009-06-01	2009-11-04	2		2009-11-17	2009-11-18	2009-11-19	2	2	2009-12-02	2.33	2009-12-02	Abia
NIE	Case-based	2009-12-02	29	9	F	U	2009-11-20	1	2009-11-20	1981-01-21	2009-11-16	2		2009-11-20	2009-11-21	2009-12-10	2	2	2009-12-22	29.75	2009-12-22	Abia
NIE	Case-based	2009-12-02	12	2	2	R	2009-11-21	1	2009-11-22	2006-10-14	2009-08-16	2		2009-08-17	2009-11-24	2009-11-25	2	2	2009-12-02	12.17	2009-12-02	Abia
NIE	Case-based	2009-12-02	5	6	2	R	2009-11-23		2009-11-23		2009-11-21	2		2009-11-24	2009-11-25	2009-11-26	2	2	2009-12-08	5.5	2009-12-08	Abia
NIE	Case-based	2009-12-02	0	8	2	U	2009-11-23		2009-11-24		2009-11-23	2		2009-11-25	2009-11-26	2009-11-26	2	2	2009-12-08	0.67	2009-12-08	Abia
NIE	Case-based	2008-11-04	0	6	2	U	2008-10-13	0	2008-10-14		2008-10-08	2	2008-10-21	2008-10-14	2008-10-21	2008-10-21	2	2	2008-10-24	0.5	2008-10-21	Abia
NIE	Case-based	2008-11-04	2	0	2	R	2008-10-17	0	2008-10-22		2008-10-16	2	2008-10-24	2008-10-23	2008-10-26	2008-10-26	2	5	2008-10-29	2	2008-10-26	Abia
NIE	Case-based	2008-11-04	2	2	1	R	2008-10-22	2	2008-10-22	2007-05-17	2008-10-19	2	2008-10-24	2008-10-23	2008-10-26	2008-10-26	2	5	2008-10-29	2.17	2008-10-26	Abia
NIE	Case-based	2008-11-04	0	11	1	R	2008-10-16	1	2008-10-22	2008-09-18	2008-10-15	2	2008-10-24	2008-10-23	2008-10-26	2008-10-26	2	5	2008-10-29	0.92	2008-10-26	Abia
NIE	Line list		6					1			2006-04-30	2										Abia
NIE	Line list		9					0			2006-05-01	2										Abia
NIE	Line list		6					0			2006-05-02	2										Abia
NIE	Line list		5					0			2006-05-01	2										Abia
NIE	Line list		4					0			2006-05-01	2										Abia
NIE	Line list		1					1			2006-04-15	1										Abia
NIE	Line list		1	5				1			2006-05-02	2										Abia
NIE	Line list		1	8				1			2006-05-01	2										Abia
NIE	Line list		2					1			2006-05-08	2										Abia
NIE	Line list			7				1			2006-05-09	2										Abia
NIE	Line list		1	9				0			2006-05-09	2										Abia
NIE	Line list		2					1			2006-05-14	2										Abia
NIE	Line list			9				1			2006-05-18	2										Abia
NIE	Line list		1	8				1			2006-05-19	2										Abia
NIE	Line list		2					1			2006-04-30	2										Abia
NIE	Line list		2	6				1			2006-05-12	2										Abia
NIE	Line list		1	5				1			2006-05-04	2										Abia
NIE	Line list		3					0			2006-05-16	2										Abia
NIE	Line list		1	9				1			2006-05-20	2										Abia
NIE	Line list		15	0				0			2006-06-08	2										Abia
NIE	Line list		2	2				1			2006-06-19	2										Abia
NIE	Line list		3					1			2006-06-14	2										Abia
NIE	Line list		9					0			2006-06-20	2										Abia
NIE	Line list		10					2			2006-06-08	1										Abia
NIE	Line list		7					2			2006-06-13	2										Abia
NIE	Line list			2				1			2006-06-13	2										Abia
NIE	Line list		1	6				0			2006-06-13	2										Abia
NIE	Line list		1	9				0			2006-05-27	2										Abia
NIE	Line list		6					0			2006-05-27	2										Abia
NIE	Line list		6					0			2006-05-29	2										Abia
NIE	Line list		3					0			2006-05-29	2										Abia
NIE	Line list		2					0			2006-06-06	2										Abia
NIE	Line list		5					0			2006-08-09	2										Abia
NIE	Line list		3					0			2006-08-09	2										Abia
NIE	Line list		1	4				0			2006-08-09	2										Abia
NIE	Line list			11				0			2006-08-09	2										Abia
NIE	Line list		1	4				0			2006-08-09	2										Abia
NIE	Line list		1	9				0			2006-08-11	2										Abia
NIE	Line list		1	1				0			2006-08-20	2										Abia
NIE	Line list			5				0			2006-08-03	2										Abia
NIE	Line list			3				0			2006-08-11	2					2					Abia
NIE	Line list			10				0			2006-08-23	2										Abia
NIE	Line list			10				0			2006-08-20	2										Abia
NIE	Line list		2					0			2006-08-09	2										Abia
NIE	Line list		2					0			2006-08-09	2										Abia
NIE	Line list		1					0			2006-08-20	2										Abia
NIE	Line list		4					0			2006-08-13	2										Abia
NIE	Line list		3					0			2006-08-20	2										Abia
NIE	Case-based	2008-04-08	9	6	2	R	2008-03-20	0	2008-03-20		2008-03-19	2	2008-03-20	2008-03-24	2008-03-25	2008-03-25	3	2	2008-04-23	9.5	2008-03-25	Abia
NIE	Case-based	2010-03-24	2	0	M	R	2010-03-06	1	2010-03-07	2009-04-02	2010-02-28	2		2010-03-10	2010-03-10	2010-03-11	2	2	2010-03-12	2	2010-03-12	Abia
NIE	Case-based	2010-03-24	2	9	M	R	2010-03-06	1	2010-03-07	2008-05-28	2010-02-15	2		2010-03-10	2010-03-10	2010-03-11	2	2	2010-03-12	2.75	2010-03-12	Abia
NIE	Case-based	2010-03-24	2	4	M	R	2010-03-06	0	2010-03-07		2010-02-25	2		2010-03-10	2010-03-10	2010-03-11	2	2	2010-03-12	2.33	2010-03-12	Abia
NIE	Case-based	2010-03-24	3	10	F	R	2010-03-08	0	2010-03-08		2010-03-06	2		2010-03-10	2010-03-11	2010-03-11	2	2	2010-03-12	3.83	2010-03-12	Abia
NIE	Case-based	2010-04-20	0	6	F	R	2010-04-12	2	2010-04-12	2005-03-20	2010-03-12	2	2010-04-14	2010-03-22	2010-03-30	2010-03-30	2	2	2010-04-22	0.5	2010-04-29	Abia
NIE	Case-based	2010-04-20	3	8	M	R	2010-04-01	2	2010-04-01	2008-11-12	2010-03-25	2	2010-04-01	2010-04-01	2010-04-06	2010-04-07	2	2	2010-04-29	3.67	2010-04-29	Abia
NIE	Case-based	2009-08-12	1	4	2	U	2009-07-21	1	2009-07-21	2008-12-16	2009-07-18	2		2009-07-21	2009-07-22	2009-07-23	2	2	2009-07-24	1.33	2009-07-24	Abia
NIE	Case-based	2009-08-12	13	4	1	U	2009-07-16	2	2009-07-18	2009-04-28	2009-07-16	2		2009-07-20	2009-07-21	2009-07-23	2	2	2009-07-24	13.33	2009-07-24	Abia
NIE	Case-based	2009-10-08	18	5	2	U	2009-09-27	1	2009-09-28		2009-09-25	2		2009-10-01	2009-10-03	2009-10-03	2	2	2009-07-20	18.42	2009-07-20	Abia
NIE	Case-based	2009-12-09	5	0	2	R	2009-11-29	0	2009-11-30		2009-11-20	2		2009-11-22	2009-12-01	2009-12-02	2	2	2009-12-22	5	2009-12-22	Abia
NIE	Case-based	2009-12-09	0	9	1	R	2009-11-23	0	2009-11-25		2009-11-20	2		2009-11-30	2009-12-01	2009-12-02	2	2	2009-12-22	0.75	2009-12-22	Abia
NIE	Case-based	2007-10-10	1	6	1	R	2007-09-06		2007-09-06		2007-09-05	2	2007-09-06	2007-09-07	2007-09-08	2007-09-08	2	2	2007-09-10	1.5	2007-09-10	Abia
NIE	Case-based	2007-10-10	6	10	1	R	2007-09-10	1	2007-09-11	2001-08-22	2007-09-06	2	2007-09-11	2007-09-12	2007-09-13	2007-09-13	2	1	2007-10-02	6.83	2007-10-02	Abia
NIE	Case-based	2007-10-10	14	11	1	R	2007-09-14		2007-09-16		2007-09-14	2		2007-09-17	2007-09-19	2007-09-19	2	2	2007-10-03	14.92	2007-10-03	Abia
NIE	Case-based		4	3	1	R	2007-04-10	1	2007-04-11	2006-10-04	2007-04-10	2		2007-04-11	2007-04-13	2007-04-13	2	3	2007-04-19	4.25	2007-04-19	Abia
NIE	Case-based		9	0	1	U	2007-04-03	9	2007-04-03		2007-03-30	2		2007-04-03	2007-04-04	2007-04-04	2	1	2007-04-14	9	2007-04-14	Abia
NIE	Case-based	2007-11-28	4	9	1	U	2007-11-14	1	2007-11-14		2007-11-13	2		2007-11-15	2007-11-16	2007-11-17	2	2	2007-11-22	4.75		Abia
NIE	Line list		19					0			2006-09-15	2										Abia
NIE	Line list			6				0			2006-09-12	2										Abia
NIE	Line list		6					1			2006-09-06	2										Abia
NIE	Line list		2					1			2006-09-04	2										Abia
NIE	Line list		1					1			2006-09-10	2										Abia
NIE	Line list		7					1			2006-09-01	2										Abia
NIE	Line list			6				0			2006-09-13	2										Abia
NIE	Line list			10				0			2006-09-11	2										Abia
NIE	Line list			8				0			2006-09-06	2										Abia
NIE	Line list			7				0			2006-08-28	2										Abia
NIE	Line list		2					1			2006-10-02	2										Abia
NIE	Line list		1	2				0			2006-03-02	2										Abia
NIE	Line list		1					0			2006-03-08	2										Abia
NIE	Case-based		9	2	2	R		2		1998-01-17	2007-03-13	2		2007-03-14	2007-03-19	2007-03-20	2	1	2007-03-30	9.17		Abia
NIE	Case-based		10	3	1	R	2007-03-16	1	2007-03-18		2007-03-14	2		2007-03-21	2007-03-22	2007-03-22	2	2	2007-03-30	10.25	2007-03-30	Abia
NIE	Case-based		1	0	1	R	2007-03-15	0	2007-03-16		2007-03-14	2	2007-03-16	2007-03-18	2007-03-19	2007-03-19	2	1	2007-03-30	1	2007-03-30	Abia
NIE	Case-based		4	3	2	U	2007-03-17	1	2007-03-19	2003-09-22	2007-03-16	1		2007-03-19	2007-03-21	2007-03-21	2	1	2007-03-31	4.25	2007-03-31	Abia
NIE	Case-based		8	0	2	R	2007-05-02	1	2007-05-14	2006-10-04	2007-04-28	2		2007-05-15	2007-05-16	2007-05-16	2	1	2007-05-23	8	2007-05-23	Abia
NIE	Case-based	2010-03-31	0	5	M	R	2010-03-19	0	2010-03-22		2010-03-12	2		2010-03-22	2010-03-30	2010-03-30	2	2	2010-04-22	0.42	2010-04-22	Abia
NIE	Case-based	2010-03-31	2	2	F	U	2010-03-24	1	2010-03-25	2008-11-02	2010-03-21	2	2010-03-25	2010-03-25	2010-03-30	2010-03-30	2	2	2010-04-22	2.17	2010-04-22	Abia
NIE	Case-based	2010-05-25	0	9	M	U	2010-05-11	1	2010-05-11	2010-04-06	2010-05-08	2		2010-05-13	2010-05-20	2010-05-22	2	2	2010-06-14	0.75	2010-06-14	Abia
NIE	Case-based	2010-05-26	1	8	M	R	2010-05-17	0	2010-05-17		2010-05-16	2		2010-05-17	2010-05-20	2010-05-22	1	1	2010-06-14	1.67	2010-06-22	Abia
NIE	Case-based	2010-05-26	1	4	F	R	2010-05-15	0	2010-05-17		2010-05-13	2		2010-05-17	2010-05-20	2010-05-22	1	4	2010-06-14	1.33	2010-06-22	Abia
NIE	Case-based	2010-03-30	6	6	M	R	2010-03-09	1	2010-03-09	2004-06-23	2010-03-09	2		2010-03-15	2010-03-16	2010-03-18	2	2	2010-04-07	6.5	2010-04-07	Abia
NIE	Case-based	2010-03-30	4	0	F	U	2010-03-10	1	2010-03-10	2008-11-24	2010-03-07	2		2010-03-16	2010-03-16	2010-03-18	2	1	2010-04-07	4	2010-03-12	Abia
NIE	Case-based	2010-03-30	2	0	F	R	2010-03-09	1	2010-03-11	2009-12-21	2010-03-07	2		2010-03-12	2010-03-16	2010-03-18	2	1	2010-04-07	2	2010-04-07	Abia
NIE	Case-based	2011-11-28	6	9	F	R	2011-10-24	0	2011-10-24		2011-10-20	1	2011-10-25	2011-10-25	2011-11-02	2011-11-02	2	2	2012-03-08	6.75		Abia
NIE	Case-based	2011-11-28	2	0	F	R	2011-11-15	1	2011-11-15	2010-10-13	2011-11-06	2		2011-11-15	2011-11-16	2011-11-16	2	5	2012-03-13	2	2012-03-13	Abia
NIE	Case-based	2011-11-28	2	5	F	U	2011-11-14	1	2011-11-15	2010-04-07	2011-11-08	2		2011-11-15	2011-11-16	2011-11-16	2	5	2012-03-13	2.42	2012-03-13	Abia
NIE	Case-based	2010-03-30	4	10	M	R	2010-03-12	1	2010-03-12	2006-12-18	2010-03-08	2		2010-03-12	2010-03-13	2010-03-18	2	1	2010-04-07	4.83	2010-04-07	Abia
NIE	Case-based	2010-03-30	0	10	M	R	2010-03-15	1	2010-03-15	2010-02-15	2010-03-15	2		2010-03-18	2010-03-19	2010-03-19	2	2		0.83		Abia
NIE	Case-based	2010-03-30	21	0	F	R	2010-03-14	0	2010-03-16		2010-03-13	2		2010-03-18	2010-03-19	2010-03-19	2	2		21		Abia
NIE	Case-based		8	8	2	R	2007-04-15	2	2007-04-20	2006-05-18	2007-04-14	2		2007-04-24	2007-04-25	2007-04-25	2	2	2007-05-03	8.67	2007-05-03	Abia
NIE	Case-based		8	0	1	R	2007-04-20	1	2007-04-21	2006-10-22	2007-04-18	2		2007-04-24	2007-04-25	2007-04-25	2	1	2007-05-03	8	2007-05-03	Abia
NIE	Case-based		0	9	1	R	2007-04-25	1	2007-04-27	2006-07-27	2007-04-25	2	2007-05-03	2007-05-03	2007-05-05	2007-05-05	2	2	2007-05-23	0.75	2007-05-23	Abia
NIE	Case-based	2007-11-28	62	0	1	R	2007-11-09		2007-11-12		2007-11-05	2		2007-11-14	2007-11-14	2007-11-16	2	3	2007-11-22	62		Abia
NIE	Case-based		16	0	2	R	2007-04-30	1	2007-05-03	2006-10-05	2007-04-30	2		2007-05-08	2007-05-09	2007-05-09	2	1	2007-05-23	16	2007-05-23	Abia
NIE	Case-based		1	5	1	R	2007-05-08	1	2007-05-09		2007-05-06	2		2007-05-10	2007-05-11	2007-05-11	2	2	2007-05-23	1.42	2007-05-23	Abia
NIE	Case-based		6	8	1	R	2007-05-08	1	2007-05-08	2006-10-25	2007-05-07	2		2007-05-09	2007-05-10	2007-05-10	2	2	2007-05-23	6.67	2007-05-23	Abia
NIE	Line list			5				0			2006-08-16	2										Abia
NIE	Line list			8				0			2006-08-11	2										Abia
NIE	Line list			10				0			2006-08-14	2										Abia
NIE	Line list			2				0			2006-08-20	2										Abia
NIE	Line list			8				0			2006-08-20	2										Abia
NIE	Line list		1	1				0			2006-08-20	2										Abia
NIE	Line list			6				0			2006-08-20	2										Abia
NIE	Line list		1	10				0			2006-08-15	2										Abia
NIE	Line list		1	2				0			2006-08-18	2										Abia
NIE	Line list		1	4				0			2006-08-18	2					2					Abia
NIE	Line list		1	2				0			2006-08-18	2										Abia
NIE	Line list		2					0			2006-08-11	2										Abia
NIE	Line list			9				0			2006-08-11	2										Abia
NIE	Line list			10				0			2006-08-11	2										Abia
NIE	Line list		1	4				0			2006-08-11	2										Abia
NIE	Line list		2	4				0			2006-08-13	2										Abia
NIE	Line list		2					0			2006-08-18	2										Abia
NIE	Line list		3					0			2006-08-21	2										Abia
NIE	Line list		5					0			2006-08-15	2										Abia
NIE	Line list		2					0			2006-08-16	2					2					Abia
NIE	Line list		4					0			2006-08-17	2										Abia
NIE	Line list		2					0			2006-08-20	2										Abia
NIE	Line list		2					0			2006-08-18	2										Abia
NIE	Line list			9				0			2006-08-18	2										Abia
NIE	Line list			10				0			2006-08-14	2										Abia
NIE	Line list		1	6				0			2006-08-17	2										Abia
NIE	Line list		1	8				0			2006-08-21	2										Abia
NIE	Line list		1					0			2006-08-22	2										Abia
NIE	Line list			5				0			2006-08-20	2										Abia
NIE	Line list		2	3				0			2006-08-20	2										Abia
NIE	Line list		1					0			2006-08-20	2										Abia
NIE	Line list		3					0			2006-08-18	2										Abia
NIE	Case-based		2	11	1	R	2007-05-10	9	2007-05-11		2007-05-10	2		2007-05-12	2007-05-13	2007-05-13	2	2	2007-05-23	2.92	2007-05-23	Abia
NIE	Case-based	2007-05-10	1	1	2	R	2007-05-09	1	2007-05-10	2007-01-26	2007-05-09	2		2007-05-22	2007-05-23	2007-05-23	2	2	2007-05-31	1.08	2007-05-31	Abia
NIE	Case-based		2	7	M	R	2007-05-15	0			2007-04-26	2	2007-05-16	2007-05-16	2007-05-17	2007-05-17	2	5		2.58		Abia
NIE	Case-based	2007-05-28	6	5	1	R	2007-05-24	9	2007-05-25		2007-05-22	2		2007-05-27	2007-05-28	2007-05-28	2	2	2007-06-01	6.42	2007-06-01	Abia
NIE	Case-based	2007-11-28	1	1	2	U	2007-11-12	1	2007-11-13	2007-08-07	2007-11-10	2		2007-11-15	2007-11-15	2007-11-17	2	2	2007-11-22	1.08		Abia
NIE	Case-based		22	10	2	R	2007-05-22	1	2007-05-22		2007-05-22	2		2007-05-30	2007-05-31	2007-05-31	2	2	2007-06-01	22.83	2007-06-01	Abia
NIE	Case-based		1	0	1	R	2007-05-25	1	2007-05-26	2007-02-12	2007-05-23	2		2007-06-02	2007-06-03	2007-06-03	2	2	2007-07-01	1	2007-07-01	Abia
NIE	Case-based	2007-11-28	2	0	2	U	2007-11-05	1	2007-11-06	2006-09-12	2007-11-02	2		2007-11-07	2007-11-07	2007-11-08	1	4	2007-11-14	2		Abia
NIE	Case-based		1	0	2	R	2007-05-28	1	2007-05-31	2007-02-21	2007-05-28	2		2007-06-02	2007-06-04	2007-06-04	2	2	2007-07-01	1	2007-07-01	Abia
NIE	Case-based		3	9	2	R	2007-06-01	2	2007-06-01		2007-05-28	2	2007-06-01	2007-06-02	2007-06-04	2007-06-04	2	2	2007-07-01	3.75	2007-07-01	Abia
NIE	Case-based		11	6	1	R	2007-05-31	9			2007-05-28	2		2007-06-06	2007-06-07	2007-06-07	2	1	2007-07-01	11.5	2007-07-01	Abia
NIE	Case-based		0	11	1	R		0			2007-05-21	2		2007-05-31	2007-06-01	2007-06-01	2	2	2007-07-01	0.92		Abia
NIE	Case-based	2007-11-28	0	7	1	R	2007-10-29		2007-11-01		2007-10-27	2	2007-11-14	2007-11-14	2007-11-14	2007-11-16	2	2	2007-11-22	0.58		Abia
NIE	Case-based	2007-11-28	1	8	1	R	2007-10-31	1	2007-11-04	2007-01-17	2007-10-31	2		2007-11-07	2007-11-07	2007-11-09	2	2	2007-11-14	1.67		Abia
NIE	Line list		3					0			2006-08-18	2										Abia
NIE	Line list		4	5				0			2006-08-13	2										Abia
NIE	Line list		2					0			2006-08-15	2										Abia
NIE	Line list		3					0			2006-08-12	2										Abia
NIE	Line list			8				0			2006-08-18	2										Abia
NIE	Line list		1	2				1			2006-08-18	2										Abia
NIE	Line list			9				0			2006-08-18	2										Abia
NIE	Line list		3					0			2006-08-18	2										Abia
NIE	Line list			11				0			2006-08-11	2										Abia
NIE	Line list		1					0			2006-08-11	2										Abia
NIE	Line list		3	2				0			2006-08-11	2										Abia
NIE	Line list		2					0			2006-08-15	2										Abia
NIE	Line list		1	5				0			2006-08-18	2										Abia
NIE	Line list			10				0			2006-08-15	2										Abia
NIE	Line list		1	8				0			2006-08-18	2										Abia
NIE	Line list			5				0			2006-08-14	2										Abia
NIE	Line list		1	7				1			2006-08-15	2										Abia
NIE	Line list		1	7				1			2006-08-10	2										Abia
NIE	Case-based	2008-03-04	1	4	1	R	2008-02-05	1	2008-02-05	2007-02-07	2008-02-03	2	2008-02-07	2008-02-05	2008-02-07	2008-02-08	2	2	2008-02-08	1.33	2008-02-08	Abia
NIE	Case-based	2008-03-05	1	6	1	R	2008-02-11		2008-02-11		2008-02-08	2	2008-02-13	2008-02-11	2008-02-12	2008-02-13	2	2	2008-02-25	1.5	2008-02-13	Abia
NIE	Case-based	2008-03-05	6	0	1	R		2	2001-01-26	2006-10-22	2008-01-20	2		2008-02-07	2008-02-08	2008-02-08	2	2	2008-02-12	6	2008-02-08	Abia
NIE	Case-based	2008-03-05	6	1	2	R			2008-01-28		2008-01-26	2		2008-02-07	2008-02-08	2008-02-08	2	2	2008-02-11	6.08	2008-02-08	Abia
NIE	Case-based	2008-03-05	2	7	2	R	2008-02-10		2008-02-11		2008-02-10	2	2008-02-11	2008-02-12	2008-02-13	2008-02-14	2	2	2008-02-25	2.58	2008-02-14	Abia
NIE	Case-based	2008-10-15	2	9	2	R	2008-09-10	1	2008-09-19	2007-09-12	2008-09-10	2	2008-09-24	2008-10-02	2008-10-03	2008-10-03	2	3	2008-10-06	2.75	2008-10-03	Abia
NIE	Case-based	2008-03-13	0	10	2	R	2008-02-22	0	2008-02-28		2008-02-15	2		2008-03-03	2008-03-04	2008-03-04	2	2	2008-03-11	0.83	2008-03-04	Abia
NIE	Case-based	2008-03-13	6	10	2	R	2008-02-16	0	2008-02-18		2008-02-11	2		2008-02-19	2008-02-20	2008-02-20	2	2	2008-02-25	6.83	2008-02-20	Abia
NIE	Case-based	2008-12-03	10	0	2	R	2008-11-17	2	2008-11-18	2006-10-16	2008-11-10	2		2008-11-25	2008-11-26	2008-11-26	2	2	2008-11-28	10	2008-11-26	Abia
NIE	Case-based	2008-12-30	2	11	1	R	2008-12-17	2	2008-12-17	2006-10-26	2008-12-16	2		2008-12-18	2008-12-19	2008-12-20	2	2	2008-12-23	2.92	2008-12-20	Abia
NIE	Case-based	2008-03-14	0	5	1	R	2008-02-16	0	2008-02-17		2008-02-15	2		2008-02-19	2008-02-20	2008-02-20	2	2	2008-02-25	0.42	2008-02-20	Abia
NIE	Case-based	2008-03-14	8	0	1	R	2008-02-18	0	2008-02-18		2008-02-16	2		2008-02-20	2008-02-21	2008-02-21	2	1	2008-02-25	8	2008-02-21	Abia
NIE	Case-based	2008-03-14	4	0	2	R	2008-02-18	1	2008-02-18	2006-10-21	2008-02-17	2		2008-02-20	2008-02-21	2008-02-21	2	1	2008-02-25	4	2008-02-21	Abia
NIE	Case-based	2008-03-14	16	0	2	R	2008-02-18	1	2008-02-18	2006-10-21	2008-02-17	2		2008-02-20	2008-02-21	2008-02-21	2	1	2008-02-25	16	2008-02-21	Abia
NIE	Case-based	2008-03-14	5	0	2	R	2008-02-18	1	2008-02-18	2006-10-21	2008-02-16	2		2008-02-20	2008-02-21	2008-02-21	2	1	2008-02-25	5	2008-02-21	Abia
NIE	Case-based	2008-03-14	16	0	2	R	2008-02-18	1	2008-02-18	2006-10-21	2008-02-17	2		2008-02-20	2008-02-21	2008-02-21	2	1	2008-02-25	16	2008-02-21	Abia
NIE	Case-based	2008-03-14	8	0	2	R	2008-02-18	1	2008-02-18	2006-10-21	2008-02-17	2		2008-02-20	2008-02-21	2008-02-21	2	1	2008-02-25	8	2008-02-21	Abia
NIE	Case-based	2008-03-14	2	9	1	R	2008-02-25	1	2008-02-25	2006-03-14	2008-02-23	2		2008-02-26	2008-02-26	2008-02-26	2	3	2008-03-10	2.75	2008-02-26	Abia
NIE	Case-based	2008-03-14	0	8	2	U	2008-02-25	0	2008-02-25		2008-02-24	2	2008-02-27	2008-02-25	2008-02-27	2008-02-27	2	2	2008-03-10	0.67	2008-02-27	Abia
NIE	Case-based	2008-03-14	7	3	1	R	2008-02-27	2	2008-02-27	2007-10-09	2008-02-23	2		2008-02-27	2008-02-28	2008-02-28	2	2	2008-03-10	7.25	2008-02-28	Abia
NIE	Case-based	2008-03-14	1	2	1	R	2008-02-27	2	2008-02-27	2007-10-09	2008-02-23	2		2008-02-27	2008-02-28	2008-02-28	2	2	2008-03-10	1.17	2008-02-28	Abia
NIE	Case-based	2008-03-14	2	7	1	R	2008-02-28	0	2008-02-28		2008-02-17	2	2008-02-28	2008-02-28	2008-02-29	2008-02-29	2	2	2008-03-10	2.58	2008-02-29	Abia
NIE	Case-based	2008-03-14	0	9	1	R	2008-02-25	0	2008-02-27		2008-02-25	2	2008-02-27	2008-02-27	2008-02-28	2008-02-29	2	1	2008-03-10	0.75	2008-02-29	Abia
NIE	Case-based	2008-03-14	0	5	1	R	2008-02-26	0	2008-02-26		2008-02-20	2	2008-02-27	2008-02-27	2008-02-28	2008-02-29	2	2	2008-03-10	0.42	2008-02-29	Abia
NIE	Case-based	2008-04-01	36	5	1	R	2008-03-14	1	2008-03-14	1972-06-20	2008-03-10	2	2008-03-18	2008-03-14	2008-03-18	2008-03-19	2	1	2008-03-20	36.42	2008-03-19	Abia
NIE	Case-based	2008-04-01	2	7	1	U	2008-03-18	1	2008-03-18	2006-05-30	2008-03-16	2		2008-03-19	2008-03-19	2008-03-19	2	2	2008-04-23	2.58	2008-03-19	Abia
NIE	Case-based	2008-04-01	1	0	1	R	2008-03-16	1	2008-03-17	2007-11-05	2008-03-16	2		2008-03-18	2008-03-19	2008-03-19	2	2	2008-04-23	1	2008-03-19	Abia
NIE	Case-based	2008-04-01	2	1	1	R	2008-03-13	1	2008-03-13	2007-09-26	2008-02-20	2	2008-03-14	2008-03-14	2008-03-15	2008-03-15	2	2	2008-03-20	2.08	2008-03-15	Abia
NIE	Case-based	2008-04-01	0	8	1	R	2008-03-13	0	2008-03-13		2008-03-05	2		2008-03-14	2008-03-15	2008-03-16	2	2	2008-03-20	0.67	2008-03-16	Abia
NIE	Case-based	2008-04-01	10	10	1	R	2008-03-14	2	2008-03-14		2008-03-09	2		2008-03-14	2008-03-15	2008-03-15	2	1	2008-03-20	10.83	2008-03-15	Abia
NIE	Case-based	2008-04-01	4	0	1	R	2008-03-13	1	2008-03-14		2008-03-08	2		2008-03-14	2008-03-15	2008-03-15	2	1	2008-03-20	4	2008-03-15	Abia
NIE	Case-based	2008-04-01	9	4	1	R	2008-03-13	2	2008-03-14		2008-03-09	2		2008-03-14	2008-03-15	2008-03-15	2	1	2008-03-20	9.33	2008-03-15	Abia
NIE	Case-based	2008-04-01	12	1	1	R	2008-03-08	2	2008-03-12		2008-03-06	2		2008-03-12	2008-03-14	2008-03-14	2	1	2008-03-20	12.08	2008-03-14	Abia
NIE	Case-based	2008-04-01	11	6	2	R	2008-03-09	1	2008-03-11		2008-03-09	2		2008-03-12	2008-03-14	2008-03-14	2	1	2008-03-20	11.5	2008-03-14	Abia
NIE	Case-based	2007-11-28	9	0	1	U	2007-11-12	2	2007-11-15	2006-10-05	2007-11-09	2	2007-11-16	2007-11-19	2007-11-19	2007-11-20	2	2	2007-11-23	9		Abia
NIE	Case-based		57	0	2	R	2007-06-08	1	2007-06-10		2007-06-06	2		2007-06-12	2007-06-13	2007-06-13	2	2	2007-07-01	57	2007-07-01	Abia
NIE	Case-based	2007-11-28	31	9	2	R	2007-11-11	1	2007-11-12	1977-01-15	2007-11-10	2	2007-11-13	2007-11-13	2007-11-14	2007-11-15	2	2	2007-11-15	31.75		Abia
NIE	Case-based		3	7	1	R	2007-06-04	2	2007-06-05	2004-10-10	2007-06-01		2007-06-06	2007-06-08	2007-06-09	2007-06-09	2	2	2007-07-01	3.58		Abia
NIE	Case-based	2007-11-28	14	8	2	R	2007-11-12	1	2007-11-12	2007-01-18	2007-11-11	2	2007-11-13	2007-11-13	2007-11-14	2007-11-15	2	2	2007-11-15	14.67		Abia
NIE	Case-based	2007-11-28	10	0	1	R	2007-11-08	2	2007-11-09	2006-04-09	2007-11-02	2		2007-11-12	2007-11-12	2007-11-13	2	2	2007-11-15	10		Abia
NIE	Case-based	2007-06-21	2	6	2	R	2007-06-08	1	2007-06-14		2007-05-28	2	2007-06-14	2007-06-21	2007-06-22	2007-06-22	2	2	2007-07-01	2.5	2007-07-01	Abia
NIE	Case-based		0	7	1	R	2007-06-20	0	2007-06-20		2007-06-14	2		2007-06-21	2007-06-23	2007-06-23	2	2	2007-07-01	0.58	2007-06-01	Abia
NIE	Case-based	2007-06-20	0	6	2	R	2007-06-20	0	2007-06-20		2007-06-19	2	2007-06-20	2007-06-21	2007-06-22	2007-06-22	1	4	2007-07-01	0.5	2007-07-01	Abia
NIE	Case-based		8	8	2	U	2007-06-25	1	2007-06-27	2006-10-28	2007-05-30	2		2007-06-14	2007-06-28	2007-06-29	2	1	2007-07-01	8.67	2007-07-07	Abia
NIE	Case-based		2	5	2	U	2007-06-13	2	2007-06-13	2006-10-28	2007-04-26	2		2007-05-16	2007-05-17	2007-05-17	2	1	2007-05-23	2.42	2007-05-23	Abia
NIE	Case-based		18	0	2	R	2007-05-30	1	2007-05-30		2007-05-28	2	2007-06-26	2007-06-26	2007-06-29	2007-06-29	2	1	2007-07-07	18	2007-07-07	Abia
NIE	Case-based		3	2	2	R	2007-06-18	1	2007-06-26		2007-05-30	2		2007-06-27	2007-06-29	2007-06-29	2	2	2007-07-07	3.17		Abia
NIE	Case-based		0	6	2	U	2007-06-25	0	2007-06-27		2007-06-23	2		2007-06-25	2007-06-27	2007-06-27	2	3	2007-07-07	0.5	2007-07-07	Abia
NIE	Case-based		5	4	2	R	2007-06-25	9	2007-06-26	2006-10-22	2007-06-23	2		2007-06-27	2007-06-29	2007-06-29	2	2	2007-07-07	5.33	2007-07-07	Abia
NIE	Case-based		43	0	2	R	2007-06-11	0	2007-06-11		2007-06-08	2	2007-06-28	2007-06-28	2007-06-29	2007-06-29	2	2	2007-07-07	43	2007-07-07	Abia
NIE	Case-based	2007-06-29	3	6	2	R	2007-06-25	2	2007-06-27	2006-08-23	2007-06-22	2		2007-06-28	2007-06-29	2007-06-29	2	3	2007-07-07	3.5	2007-07-07	Abia
NIE	Case-based	2007-06-29	2	6	2	R	2007-06-25	2	2007-06-27	2006-08-23	2007-06-23	2		2007-06-28	2007-06-29	2007-06-29	2	1	2007-07-07	2.5	2007-07-07	Abia
NIE	Case-based		0	8	2	U	2007-07-06	0	2007-07-07		2007-07-04	2		2007-07-07	2007-07-09	2007-07-09	2	2	2007-07-18	0.67	2007-07-18	Abia
NIE	Case-based	2007-07-09	4	0	2	U	2007-07-02	1	2007-07-06		2007-07-02	2	2007-07-06	2007-07-08	2007-07-09	2007-07-09	2	2	2007-07-18	4	2007-07-18	Abia
NIE	Case-based		2	2	2	R	2007-06-29	1	2007-06-30	2006-02-13	2007-06-11	2	2007-07-03	2007-07-03	2007-07-05	2007-07-05	2	2	2007-07-18	2.17	2007-07-18	Abia
NIE	Case-based		0	11	1	U	2007-06-27	0	2007-07-04		2007-06-24	2	2007-07-05	2007-06-27	2007-06-29	2007-06-29	2	2	2007-07-07	0.92	2007-07-18	Abia
NIE	Case-based	2007-07-13	26	0	2	R	2007-07-11	9	2007-07-11		2007-07-10	2	2007-07-11	2007-07-13	2007-07-15	2007-07-15	2	2	2007-07-28	26	2007-07-28	Abia
NIE	Case-based		3	4	2	U	2007-07-12	2	2007-07-12	2006-10-26	2007-06-18	2	2007-07-12	2007-07-04	2007-07-13	2007-07-14	2	2	2007-07-18	3.33	2007-07-28	Abia
NIE	Case-based	2008-04-08	0	5	1	R	2008-03-28	0	2008-03-28		2008-03-23	2		2008-03-28	2008-03-29	2008-03-30	2	2	2008-04-23	0.42	2008-03-30	Abia
NIE	Case-based	2008-04-08	6	1	1	U	2008-03-21	2	2008-03-21	2007-02-14	2008-03-20	2	2008-03-24	2008-03-24	2008-03-26	2008-03-27	2	2	2008-04-23	6.08	2008-03-27	Abia
NIE	Case-based	2008-04-08	4	2	1	U	2008-03-24	2	2008-03-24	2006-02-15	2008-03-21	2		2008-03-25	2008-03-25	2008-03-27	1	4	2008-04-23	4.17	2008-03-27	Abia
NIE	Case-based	2008-04-08	5	8	2	R	2008-03-26	2	2008-03-27	2006-10-07	2008-03-25	2		2008-03-29	2008-03-30	2008-03-31	2	3	2008-04-23	5.67	2008-03-31	Abia
NIE	Case-based	2008-04-16	3	11	1	R	2008-04-04	1	2008-04-04		2008-03-28	2		2008-04-06	2008-04-07	2008-04-07	2	2	2008-04-25	3.92	2008-04-07	Abia
NIE	Case-based	2008-04-16	2	11	1	R	2008-04-05	1	2008-04-05		2008-04-02	2		2008-04-06	2008-04-07	2008-04-07	2	2	2008-04-25	3.92	2008-04-07	Abia
NIE	Case-based	2008-05-13	11	5	1	U	2008-05-02	1	2008-05-02	1997-07-06	2008-04-29	2		2008-05-02	2008-05-03	2008-05-03	2	2	2008-05-06	11.42	2008-05-03	Abia
NIE	Case-based	2008-05-13	2	0	2	R	2008-04-18	1	2008-04-21		2008-04-14	2	2008-04-21	2008-04-26	2008-04-27	2008-04-27	2	1	2008-05-02	2	2008-04-27	Abia
NIE	Case-based	2008-05-13	2	0	2	R	2008-04-18	1	2008-04-21		2008-04-14	2	2008-04-21	2008-04-26	2008-04-27	2008-04-28	2	3	2008-05-02	2	2008-04-28	Abia
NIE	Case-based	2008-11-11	0	10	1	U	2008-10-31	1	2008-10-31		2008-10-30	2		2008-10-30	2008-11-07	2008-11-09	2	2	2008-11-13	0.83	2008-11-09	Abia
NIE	Case-based	2008-11-12	43	10	2	U	2008-10-25	1	2008-10-25	2005-10-20	2008-10-08	2		2008-10-22	2008-10-26	2008-10-26	2	5	2008-10-29	43.83	2008-10-26	Abia
NIE	Case-based	2008-11-12	1	11	1	R	2008-10-27	1	2008-10-29	2007-09-14	2008-10-26	2		2008-10-30	2008-11-07	2008-11-09	2	2	2008-11-13	1.92	2008-11-09	Abia
NIE	Case-based	2007-08-01	0	10	1	R	2007-07-20	2	2007-07-21	2006-06-20	2007-07-20	2	2007-08-01	2007-08-01	2007-08-02	2007-08-02	2	2	2007-08-04	0.83	2007-08-04	Abia
NIE	Case-based	2007-07-30	1	4	1	R	2007-07-27	1	2007-07-30	2007-01-15	2007-07-26	2		2007-07-31	2007-08-01	2007-08-01	3	2	2007-08-04	1.33	2007-08-04	Abia
NIE	Case-based		6	2	1	R	2007-07-30	2	2007-08-09		2007-07-29	2	2007-08-13	2007-08-13	2007-08-14	2007-08-14	2	2	2007-08-22	6.17	2007-08-22	Abia
NIE	Case-based		0	10	1	R	2007-07-29	0	2007-08-02		2007-07-29	2	2007-08-06	2007-08-06	2007-08-07	2007-08-07	2	2	2007-08-08	0.83	2007-08-08	Abia
NIE	Case-based		0	10	1	R		9			2007-08-05	2		2007-08-09	2007-08-10	2007-08-10	2	2	2007-08-15	0.83	2007-08-15	Abia
NIE	Case-based	2008-04-30	1	2	2	R	2008-04-15	0	2008-04-18		2008-04-14	2		2008-04-22	2008-04-23	2008-04-24	2	2	2008-04-29	1.17	2008-04-24	Abia
NIE	Case-based	2008-04-30	0	7	2	R		0			2008-03-22	2	2008-04-14	2008-04-16	2008-04-17	2008-04-18	2	2	2008-04-28	0.58	2008-04-18	Abia
NIE	Case-based	2008-05-21	1	1	1	R	2008-05-04	1	2008-05-04	2008-01-09	2008-05-03	2		2008-05-07	2008-05-07	2008-05-09	2	2	2008-05-15	1.08	2008-05-09	Abia
NIE	Case-based	2008-05-21	0	6	2	R	2008-05-05	0	2008-05-05		2008-05-03	2		2008-05-07	2008-05-08	2008-05-09	2	2	2008-05-15	0.5	2008-05-09	Abia
NIE	Case-based	2008-06-17	52	7	2	R	2008-06-07	0	2008-06-07		2008-06-06	2	2008-06-09	2008-06-10	2008-06-10	2008-06-10	2	1	2008-06-13	52.58	2008-06-10	Abia
NIE	Case-based	2008-06-17	4	6	1	R	2008-06-09	1	2008-06-09	1994-08-12	2008-06-08	2	2008-06-09	2008-06-09	2008-06-10	2008-06-10	2	2	2008-06-13	4.5	2008-06-10	Abia
NIE	Case-based	2008-06-17	0	8	2	R	2008-06-04	0	2008-06-05		2008-06-01	2		2008-06-07	2008-06-09	2008-06-09	2	3	2008-06-11	0.67	2008-06-09	Abia
NIE	Case-based	2008-07-02	10	0	2	R	2008-06-14	1	2008-06-17	2006-09-25	2008-06-12	2	2008-06-18	2008-06-18	2008-06-18	2008-06-19	3	2	2008-06-23	10	2008-06-19	Abia
NIE	Case-based	2008-07-02	0	9	1	U	2008-06-19	0	2008-06-19		2008-06-15	2		2008-06-19	2008-06-20	2008-06-21	2	2	2008-06-23	0.75	2008-06-21	Abia
NIE	Case-based	2008-07-02	1	4	1	R	2008-06-19	1	2008-06-19	2008-10-01	2008-06-18	2	2008-06-19	2008-06-19	2008-06-21	2008-06-21	2	2	2008-06-23	1.33	2008-06-21	Abia
NIE	Case-based	2008-07-02	1	8	1	R	2008-06-12	1	2008-06-14	2007-08-12	2008-06-10	2		2008-06-19	2008-06-20	2008-06-21	2	2	2008-06-23	1.67	2008-06-21	Abia
NIE	Case-based	2008-07-02	0	7	1	U	2008-06-11	0	2008-06-11		2008-06-09	2		2008-06-18	2008-06-19	2008-06-19	2	2	2008-06-23	0.58	2008-06-19	Abia
NIE	Case-based	2008-07-02	4	0	2	R	2008-06-13	1	2008-06-14	2005-02-14	2008-06-05	2		2008-06-18	2008-06-19	2008-06-19	3	2	2008-06-23	4	2008-06-19	Abia
NIE	Case-based	2008-07-02	8	0	2	R	2008-06-20	1	2008-06-20		2008-06-17	2	2008-06-20	2008-06-20	2008-06-27	2008-06-28	2	2	2008-07-01	8	2008-06-28	Abia
NIE	Case-based	2008-07-02	4	6	1	R	2008-06-13	1	2008-06-16	2004-11-14	2008-06-06	2		2008-06-16	2008-06-27	2008-06-28	2	2	2008-07-04	4.5	2008-06-28	Abia
NIE	Case-based	2008-07-02	1	8	1	R	2008-06-19	0	2008-06-24		2008-06-12	2	2008-06-24	2008-06-25	2008-06-27	2008-06-28	2	2	2008-07-01	1.67	2008-06-28	Abia
NIE	Case-based	2008-11-26	13	7	1	R	2008-11-07	1	2008-11-07	1996-01-28	2008-11-06	2	2008-11-13	2008-11-13	2008-11-14	2008-11-15	2	2	2008-11-21	13.58	2008-11-15	Abia
NIE	Case-based	2008-11-26	28	10	2	R	2008-11-06	1	2008-11-06	1980-10-27	2008-11-06	2	2008-11-13	2008-11-13	2008-11-14	2008-11-15	2	2	2008-11-21	28.83	2008-11-15	Abia
NIE	Case-based	2008-12-30	3	2	1	R	2008-12-10	2	2008-12-10	2006-10-26	2008-11-27	2		2008-12-18	2008-12-19	2008-12-20	2	2	2008-12-23	3.17	2008-12-20	Abia
NIE	Case-based	2009-01-05	0	6	1	U	2008-11-27	0	2008-11-27		2008-11-25	2		2008-11-28	2008-11-28	2008-11-30	2	5	2008-12-01	0.5	2008-11-30	Abia
NIE	Case-based	2009-01-05	0	7	1	U	2008-12-02	0	2008-12-02		2008-12-01	2		2008-12-04	2008-12-05	2008-12-05	2	5	2008-12-05	0.58	2008-12-05	Abia
NIE	Case-based	2009-01-14	3	4	1	R	2009-01-07	2	2009-01-08	2008-12-14	2008-12-30	2		2009-01-09	2009-01-10		5	5		3.33		Abia
NIE	Case-based	2009-01-28	8	0	1	U	2009-01-06	1	2009-01-06	2001-12-20	2009-01-04	2	2009-01-08	2009-01-08	2009-01-09	2009-01-10	2	2	2009-01-17	8	2009-01-17	Abia
NIE	Case-based	2009-01-28	2	1	1	U	2009-01-14	2	2009-01-15	2008-12-12	2009-01-13	2		2009-01-15	2009-01-16	2009-01-16	2	2	2009-01-17	2.08	2009-01-17	Abia
NIE	Case-based	2009-01-28	1	3	2	R	2008-12-16	2	2009-01-07	2008-12-11	2008-12-16	2		2009-01-14	2009-01-15		5	3		1.25		Abia
NIE	Case-based	2008-12-31	16	4	2	R	2008-12-08	0	2008-12-08		2008-11-30	2		2008-12-09	2008-12-12	2008-12-12	2	5	2008-12-16	16.33	2008-12-12	Abia
NIE	Case-based	2008-12-31	10	1	1	U	2008-12-05	1	2008-12-05	1999-10-14	2008-12-03	2		2008-12-07	2008-12-11	2008-12-12	2	5	2008-12-16	10.08	2008-12-12	Abia
NIE	Case-based	2009-02-03	0	11	2	R	2009-02-12	0	2009-02-12		2009-02-12	2		2009-02-23	2009-02-24	2009-02-25	2	2	2009-02-27	0.92	2009-02-27	Abia
NIE	Case-based	2009-02-03	14	11	1	U	2009-01-22	2	2009-01-22	2006-02-21	2009-01-20	2	2009-01-26	2009-01-26	2009-01-27	2009-01-28	2	2	2009-01-30	14.92	2009-01-30	Abia
NIE	Case-based	2009-02-03	2	2	1	R	2009-01-23	2	2009-01-23	2008-12-15	2009-01-17	2		2009-01-23	2009-01-28	2009-01-28	3	2	2009-01-30	2.17	2009-01-30	Abia
NIE	Case-based	2009-02-03	2	8	2	R	2009-01-27	2	2009-01-27	2008-12-11	2009-01-25	2		2009-01-27	2009-01-29	2009-01-29	2	2	2009-01-30	2.67	2009-01-30	Abia
NIE	Case-based	2008-07-16	9	2	2	R	2008-07-07	1	2008-07-07	2008-02-26	2008-07-07	2	2008-07-09	2008-07-09	2008-07-10	2008-07-10	2	2	2008-07-14	9.17	2008-07-10	Abia
NIE	Case-based	2008-07-16	0	5	1	R	2008-07-07	0	2008-07-07		2008-07-04	2		2008-07-08	2008-07-10	2008-07-10	2	2	2008-07-14	0.42	2008-07-10	Abia
NIE	Case-based	2009-02-17	15	3	2	R	2009-01-24	1	2009-01-29		2009-01-20	2		2009-02-04	2009-02-06	2009-02-06	2	2	2009-02-06	15.25	2009-02-06	Abia
NIE	Case-based	2009-02-17	1	0	2	R	2009-02-01	0	2009-02-02		2009-01-20	2		2009-02-04	2009-02-06	2009-02-06	2	2	2009-02-16	1	2009-02-16	Abia
NIE	Case-based	2009-02-17	43	10	2	R	2009-01-27	2	2009-01-27	2006-12-10	2009-01-26	2		2009-01-27	2009-02-06	2009-02-06	2	2	2009-02-16	43.83	2009-02-16	Abia
NIE	Case-based	2009-02-18	9	5	1	R	2009-02-03	1	2009-02-03	2000-09-14	2009-01-16	2	2009-02-09	2009-02-08	2009-02-09	2009-02-09	2	2	2009-02-16	9.42	2009-02-16	Abia
NIE	Case-based	2009-02-25	1	8	2	R	2009-02-12	2	2009-02-14	2008-12-09	2009-02-11	2		2009-02-18	2009-02-19	2009-02-19	2	2	2009-02-20	1.67	2009-02-20	Abia
NIE	Case-based	2009-02-23	1	11	2	R	2009-02-15	1	2009-02-16	2008-01-04	2009-02-15	2		2009-02-17	2009-02-18	2009-02-18	2	2	2009-02-20	1.92	2009-02-20	Abia
NIE	Case-based	2009-02-23	5	5	1	U	2009-02-19	3	2009-02-19	2008-12-14	2009-02-17	2		2009-02-20	2009-02-20	2009-02-22	2	2	2009-02-24	5.42	2009-02-24	Abia
NIE	Case-based	2009-03-04	2	1	2	R	2009-02-22	1	2009-02-24	2007-10-09	2009-02-22	2		2009-02-25	2009-02-25	2009-02-26	2	2	2009-02-27	2.08	2009-02-27	Abia
NIE	Case-based	2009-03-04	34	1	2	R	2009-02-20	1	2009-02-24	2008-09-29	2009-01-27	2		2009-02-16	2009-02-25	2009-02-26	2	4	2009-02-27	34.08	2009-02-27	Abia
NIE	Case-based	2009-03-04	3	10	2	R	2009-02-17	3	2009-02-18	2008-12-11	2009-02-16	2		2009-02-21	2009-02-22	2009-02-22	2	2	2009-02-24	3.83	2009-02-24	Abia
NIE	Case-based	2009-03-04	0	11	2	R	2009-03-17	1	2009-03-17	2008-12-11	2009-02-12	2		2009-02-23	2009-03-20	2009-03-22	2	2	2009-03-23	0.92	2009-03-23	Abia
NIE	Case-based	2009-03-04	1	2	2	R	2009-02-20	0	2009-02-20		2009-02-12	2	2009-02-23	2009-02-23	2009-02-24	2009-02-24	2	2	2009-02-27	1.17	2009-02-27	Abia
NIE	Case-based	2009-03-04	20	5	1	R	2009-01-28	0	2009-02-18		2009-01-27	2	2009-02-23	2009-02-23	2009-02-24	2009-02-24	3	2	2009-02-27	20.42	2009-02-27	Abia
NIE	Case-based	2009-03-11	6	6	2	R	2009-02-17	2	2009-02-26	2006-10-03	2009-02-17	2	2009-03-03	2009-03-03	2009-03-06	2009-03-08	2	2	2009-03-10	6.5	2009-03-10	Abia
NIE	Case-based	2009-03-11	0	8	1	R	2009-03-02	0	2009-03-03		2009-02-27	2		2009-03-04	2009-03-05	2009-03-06	3	2	2009-03-06	0.67	2009-03-06	Abia
NIE	Case-based	2009-03-11	2	0	1	R	2009-02-24	2	2009-02-26	2008-12-12	2009-02-24	2	2009-02-26	2009-02-26	2009-03-04	2009-03-04	2	2	2009-03-06	2	2009-03-06	Abia
NIE	Case-based	2009-03-30	3	11	2	R	2009-03-14	2	2009-03-14	2006-02-21	2009-03-10	2		2009-03-17	2009-03-17	2009-03-21	2	2	2009-03-23	3.92	2009-03-23	Abia
NIE	Case-based	2009-03-30	6	11	2	R	2009-02-23	1	2009-02-24	2003-01-05	2009-02-22	2		2009-03-18	2009-03-18	2009-03-21	2	2	2009-03-23	6.92	2009-03-23	Abia
NIE	Case-based	2009-03-30	1	4	1	R	2009-03-14	1	2009-03-15	2008-09-22	2009-03-12	2		2009-03-18	2009-03-18	2009-03-21	2	2	2009-03-23	1.33	2009-03-23	Abia
NIE	Case-based	2009-03-30	13	7	2	R	2009-03-05	3	2009-03-11	2008-12-12	2009-03-04	2	2009-03-11	2009-03-16	2009-03-16	2009-03-18	2	2	2009-03-19	13.58	2009-03-19	Abia
NIE	Case-based	2009-03-30	11	10	2	R	2009-08-18	0	2009-08-18		2009-03-17	2	2009-03-18	2009-03-19	2009-08-18	2009-08-19	2	2	2009-08-24	11.83	2009-08-24	Abia
NIE	Case-based	2009-03-30	0	6	1	R	2009-03-13	0	2009-03-14		2009-03-13	2		2009-03-15	2009-03-16	2009-03-17	2	2	2009-03-17	0.5	2009-03-17	Abia
NIE	Case-based	2009-04-01	1	8	1	R	2009-03-19	1	2009-03-20	2008-05-16	2009-03-16	2		2009-03-24	2009-03-25	2009-03-25	2	2	2009-03-26	1.67	2009-03-26	Abia
NIE	Case-based	2009-04-01	6	11	2	R	2009-03-22	1	2009-03-23	2003-02-16	2009-03-18	2		2009-03-25	2009-03-26	2009-03-26	2	2	2009-03-30	6.92	2009-03-30	Abia
NIE	Case-based	2009-04-01	0	8	1	U	2009-03-13	0	2009-03-14		2009-03-09	2	2009-03-15	2009-03-14	2009-03-18	2009-03-18	2	2	2009-03-19	0.67	2009-03-19	Abia
NIE	Case-based	2009-04-01	1	8	1	U	2009-03-13	1	2009-03-15	2009-02-22	2009-03-10	2	2009-03-16	2009-03-16	2009-03-18	2009-03-18	2	2	2009-03-19	1.67	2009-03-19	Abia
NIE	Case-based	2009-04-01	2	5	1	R	2009-03-19	1	2009-03-19	2008-12-10	2009-03-16	2		2009-03-20	2009-03-20	2009-03-21	3	2	2009-03-23	2.42	2009-03-23	Abia
NIE	Case-based	2009-04-01	26	11	2	R	2009-03-19	0	2009-03-19		2009-03-18	2		2009-03-20	2009-03-21	2009-03-21	2	2	2009-03-23	26.92	2009-03-23	Abia
NIE	Case-based	2009-04-01	4	1	1	R	2009-03-18	0	2009-03-18		2009-03-17	2	2009-03-18	2009-03-18	2009-03-20	2009-03-22	2	2	2009-03-23	4.08	2009-03-23	Abia
NIE	Case-based	2007-08-31	0	6	1	R	2007-08-26	0	2007-08-27		2007-08-26	2	2007-08-28	2007-08-27	2007-08-28	2007-08-28	2	2	2007-09-07	0.5	2007-09-07	Abia
NIE	Case-based	2007-08-29	5	0	2	R	2007-08-24		2007-08-24		2007-08-20	2	2007-08-26	2007-08-25	2007-08-26	2007-08-26	2	3	2007-09-04	5	2007-09-04	Abia
NIE	Case-based	2007-09-11	9	3	1	R	2007-08-30	0	2007-08-31		2007-08-25	2	2007-08-31	2007-09-02	2007-09-03	2007-09-03	2	2	2007-09-07	9.25	2007-09-07	Abia
NIE	Case-based	2007-09-11	3	11	2	R	2007-08-15	2	2007-08-16	2006-10-10	2007-08-14	2		2007-08-21	2007-08-22	2007-08-22	2	2	2007-09-04	3.92	2007-09-04	Abia
NIE	Case-based	2007-09-11	23	1	1	U	2007-08-24	1	2007-08-27		2007-08-24	2	2007-08-27	2007-09-03	2007-09-04	2007-09-04	3	2	2007-09-10	23.08	2007-09-10	Abia
NIE	Case-based	2011-06-28	6	2	F	R	2011-05-25	1	2011-05-25	2006-01-17	2011-05-22	2		2011-05-25	2011-06-16	2011-06-16	2	5	2012-02-09	6.17	2012-02-09	Abia
NIE	Case-based	2011-06-28	9	1	M	R	2011-05-22	1	2011-05-22	2006-10-26	2011-05-21	2		2011-06-07	2011-06-16	2011-06-16	2	5	2012-02-09	9.08	2006-10-26	Abia
NIE	Case-based	2011-06-28	0	6	F	R	2011-06-08	0	2011-06-08		2011-06-04	2		2011-06-09	2011-06-10	2011-06-16	2	5	2012-02-09	0.5	2012-02-09	Abia
NIE	Case-based	2011-06-28	8	11	M	R	2011-06-16	1	2011-06-16	2003-04-06	2011-06-13	1		2011-06-16	2011-06-29	2011-06-29	2	5	2012-02-09	8.92	2012-02-09	Abia
NIE	Case-based	2011-06-29	5	3	F	R	2011-06-13	0	2011-06-13		2011-06-10	2	2011-06-13	2011-06-13	2011-06-29	2011-06-29	2	5	2012-02-09	5.25	2012-02-09	Abia
NIE	Case-based	2011-06-29	3	8	M	R	2011-06-13	0	2011-06-13		2011-06-07	2	2011-06-13	2011-06-13	2011-06-29	2011-06-29	2	5	2012-02-09	3.67	2012-02-09	Abia
NIE	Case-based	2007-10-23	6	10	2	R	2007-10-05	1	2007-10-05	2006-10-04	2007-09-29	2	2007-10-05	2007-10-08	2007-10-09	2007-10-09	2	1	2007-10-10	6.83	2007-10-10	Abia
NIE	Case-based	2007-10-23	1	2	1	R	2007-10-05		2007-10-05		2007-09-27	2	2007-10-05	2007-10-08	2007-10-09	2007-10-09	2	2	2007-10-10	1.17	2007-10-10	Abia
NIE	Case-based	2007-10-23	2	1	2	U	2007-10-08		2007-10-08		2007-10-06	2	2007-10-10	2007-10-10	2007-10-10	2007-10-12	2	2	2007-10-18	2.08		Abia
NIE	Case-based	2007-10-23	3	1	1	R	2007-10-04		2007-10-04		2007-10-02	2	2007-10-04	2007-10-05	2007-10-05	2007-10-06	2	3	2007-10-10	3.08	2007-10-10	Abia
NIE	Case-based	2007-10-24	0	11	1	U	2007-10-09	1	2007-10-09	2007-10-02	2007-10-09	2		2007-10-10	2007-10-10	2007-10-12	2	2	2007-10-18	0.92	2007-10-18	Abia
NIE	Case-based	2007-10-24	5	0	1	R	2007-10-04		2007-10-04		2007-07-08	2	2007-10-04	2007-07-12	2007-09-09	2007-09-13	2	2	2007-07-28	5	2007-10-10	Abia
NIE	Case-based	2007-11-07	5	1	1	U	2007-10-10	1	2007-10-10	2005-08-10	2007-09-24	2	2007-10-18	2007-10-08	2007-10-23	2007-10-24	2	2	2007-10-10	5.08	2007-10-30	Abia
NIE	Case-based	2007-11-07	9	8	1	R	2007-10-16	2	2007-10-16	2006-10-03	2007-10-08	2		2007-10-21	2007-10-25	2007-10-25	2	2	2007-10-31	9.67		Abia
NIE	Case-based	2009-07-06	1	3	2	R	2009-06-14	1	2009-06-15	2008-12-16	2009-06-08	2		2009-06-16	2009-06-17	2009-06-18	2	2	2009-06-22	1.25	2009-06-22	Abia
NIE	Case-based	2009-07-06	1	0	1	R	2009-06-08	1	2009-06-08	2009-02-25	2009-06-06	2		2009-06-10	2009-06-13	2009-06-13	2	2	2009-06-15	1	2009-06-15	Abia
NIE	Case-based	2009-07-06	1	1	1	U	2009-06-08	0	2009-06-09		2009-06-06	2		2009-06-10	2009-06-12	2009-06-13	2	2	2009-06-15	1.08	2009-06-15	Abia
NIE	Case-based	2009-07-06	2	1	1	R	2009-06-17	2	2009-06-18	2008-12-12	2009-06-15	2		2009-06-21	2009-06-23	2009-06-24	2	2	2009-06-25	2.08	2009-06-25	Abia
NIE	Case-based	2009-07-06	0	8	2	U	2009-06-19	0	2009-06-22		2009-06-17	2		2009-06-22	2009-06-23	2009-06-24	2	3	2009-06-25	0.67	2009-06-25	Abia
NIE	Case-based	2009-04-28	5	2	1	R	2009-04-01	3	2009-04-01	2008-12-12	2009-03-23	2		2009-04-04	2009-04-06	2009-04-07	2	2	2009-04-14	5.17	2009-04-14	Abia
NIE	Case-based	2009-04-28	4	0	1	U	2009-04-12	2	2009-04-13	2006-12-12	2009-04-09	2	2009-04-14	2009-04-14	2009-04-15	2009-04-16	2	2	2009-04-16	4	2009-04-16	Abia
NIE	Case-based	2009-04-28	2	7	1	U	2009-04-24	1	2009-04-24	2007-09-06	2009-04-20	2		2009-04-24	2009-04-27	2009-04-27	2	2	2009-04-28	2.58	2009-04-28	Abia
NIE	Case-based	2009-05-13	2	9	1	U	2009-04-26	0	2009-04-27		2009-04-26	2	2009-04-29	2009-04-29	2009-04-30	2009-05-01	2	2	2009-05-04	2.75	2009-05-04	Abia
NIE	Case-based	2009-05-13	2	2	1	U	2009-04-26	2	2009-04-28	2008-11-12	2009-04-24	2		2009-04-29	2009-04-30	2009-05-03	2	2	2009-05-04	2.17	2009-05-04	Abia
NIE	Case-based	2009-05-13	0	11	2	U	2009-04-21	1	2009-04-22	2009-02-13	2009-04-18	2	2009-04-23	2009-04-23	2009-04-24	2009-04-25	2	2	2009-04-28	0.92	2009-04-28	Abia
NIE	Case-based	2009-05-26	0	10	2	R	2009-05-08	0	2009-05-08		2009-05-01	2	2009-05-09	2009-05-09	2009-05-11	2009-05-11	2	2	2009-05-14	0.83	2009-05-14	Abia
NIE	Case-based	2009-04-06	9	0	2	R	2009-03-03	0	2009-03-13		2009-02-28	2		2009-03-13	2009-03-16	2009-03-18	2	2	2009-03-19	9	2009-03-19	Abia
NIE	Case-based	2009-04-10	40	8	2	R	2009-03-28	9	2009-03-28		2009-03-24	2		2009-03-30	2009-03-31	2009-03-31	2	2	2009-04-14	40.67	2009-04-14	Abia
NIE	Case-based	2009-07-14	2	8	1	R	2009-06-06	1	2009-06-08	2009-06-01	2009-05-15	2	2009-06-08	2009-06-09	2009-06-10	2009-06-11	2	2	2009-06-11	2.67	2009-06-11	Abia
NIE	Case-based	2009-07-14	23	1	2	R	2009-06-19	0	2009-06-19		2009-06-03	2	2009-06-19	2009-06-20	2009-06-23	2009-06-24	2	2	2009-06-25	23.08	2009-06-25	Abia
NIE	Case-based	2009-07-14	22	11	2	R	2009-06-21	1	2009-06-22	1987-05-10	2009-06-16	2		2009-06-23	2009-06-24	2009-06-25	2	2	2009-06-25	22.92	2009-06-25	Abia
NIE	Case-based	2009-07-14	31	0	1	R	2009-06-16	0	2009-06-16		2009-06-15	2	2009-06-18	2009-06-26	2009-06-27	2009-06-27	2	2	2009-06-29	31	2009-06-29	Abia
NIE	Case-based	2009-07-14	1	10	1	R	2009-07-06	1	2009-07-07	2009-05-30	2009-07-05	2		2009-07-09	2009-07-10	2009-07-11	2	2	2009-07-15	1.83	2009-07-15	Abia
NIE	Case-based	2009-07-15	8	2	1	R	2009-07-02	1	2009-07-02	2002-02-18	2009-07-01	2		2009-07-04	2009-07-06	2009-07-07	2	2	2009-07-07	8.17	2009-07-07	Abia
NIE	Case-based	2009-07-15	7	2	2	R	2009-07-06	2	2009-07-07	2009-02-02	2009-06-13	2		2009-07-09	2009-07-10	2009-07-11	2	2	2009-07-15	7.17	2009-07-15	Abia
NIE	Case-based	2009-06-10	0	10	2	R	2009-05-30	0	2009-05-31		2009-05-30	2		2009-06-01	2009-06-02	2009-06-02	2	2	2009-06-04	0.83	2009-06-04	Abia
NIE	Case-based	2009-06-10	3	4	1	R	2009-05-28	4	2009-05-31	2009-04-14	2009-05-26	2		2009-06-01	2009-06-01	2009-06-02	2	2	2009-06-04	3.33	2009-06-04	Abia
NIE	Case-based	2009-06-10	9	1	2	R	2009-05-29	4	2009-05-30	2009-05-30	2009-05-27	2		2009-06-01	2009-06-02	2009-06-02	2	2	2009-06-04	9.08	2009-06-04	Abia
NIE	Case-based	2009-06-10	2	4	2	R	2009-05-30	2	2009-05-31	2009-03-04	2009-05-28	2		2009-06-01	2009-06-02	2009-06-02	2	2	2009-06-04	2.33	2009-06-04	Abia
NIE	Case-based	2009-06-10	2	10	1	R	2009-05-30	1	2009-05-30	2006-03-30	2009-05-20	2		2009-06-02	2009-06-05	2009-06-05	2	2	2009-06-08	2.83	2009-06-08	Abia
NIE	Case-based	2009-06-10	2	6	1	R	2009-05-30	1	2009-05-30	2007-01-06	2009-05-24	2		2009-06-02	2009-06-05	2009-06-05	2	2	2009-06-08	2.5	2009-06-08	Abia
NIE	Case-based	2009-06-10	8	6	2	R	2009-06-01	0	2009-06-02		2009-05-30	2		2009-06-04	2009-06-05	2009-06-06	2	2	2009-06-08	8.5	2009-06-08	Abia
NIE	Case-based	2009-06-10	2	0	1	R	2009-06-02	1	2009-06-02	2008-01-28	2009-05-30	2		2009-06-04	2009-06-05	2009-06-07	2	2	2009-06-08	2	2009-06-08	Abia
NIE	Case-based	2009-06-10	0	7	2	U	2009-05-21	0	2009-05-22		2009-05-17	2		2009-05-22	2009-05-23	2009-05-23	2	2	2009-05-25	0.58	2009-05-25	Abia
NIE	Case-based	2007-11-20	21	0	2	R	2007-10-26	2	2007-10-26	2006-09-13	2007-10-24	2	2007-10-31	2007-10-31	2007-11-01	2007-11-01	2	1	2007-11-06	21		Abia
NIE	Case-based	2007-12-10	3	9	1	R	2007-11-09	1	2007-11-12	2005-02-08	2007-10-30	2		2007-11-12	2007-11-12	2007-11-13	2	2	2007-11-15	3.75		Abia
NIE	Case-based	2007-12-11	9	7	2	R	2007-11-22	2	2007-11-23	2006-10-04	2007-11-19	2	2007-11-26	2007-11-26	2007-11-26	2007-11-27	2	2	2007-11-29	9.58		Abia
NIE	Case-based	2007-12-27	7	2	1	R	2007-12-06	2	2007-12-11	2006-11-19	2007-12-01	2		2007-12-17	2007-12-17	2007-12-18	3	2	2007-12-19	7.17		Abia
NIE	Case-based	2009-06-10	2	5	1	U	2009-05-16	2	2009-05-16	2009-02-28	2009-05-12	2	2009-05-21	2009-05-15	2009-05-21	2009-05-27	2	2	2009-05-28	2.42	2009-05-28	Abia
NIE	Case-based	2009-06-24	3	11	1	R	2009-06-09	4	2009-06-11	2009-06-30	2009-06-05	2		2009-06-11	2009-06-12	2009-06-13	2	2	2009-06-15	3.92	2009-06-15	Abia
NIE	Case-based	2009-07-30	1	6	1	U	2009-07-13	0	2009-07-13		2009-06-29	2		2009-07-15	2009-07-16	2009-07-17	2	2	2009-07-20	1.5	2009-07-20	Abia
NIE	Case-based	2009-07-29	1	2	2	U	2009-07-16	1	2009-07-17	2009-01-10	2009-07-15	2		2009-07-19	2009-07-20	2009-07-20	2	2	2009-07-20	1.17	2009-07-20	Abia
NIE	Case-based	2009-07-29	6	4	2	R	2009-07-16	1	2009-07-16	2003-12-05	2009-07-14	2	2009-07-16	2009-07-19	2009-07-20	2009-07-20	2	1	2009-07-20	6.33	2009-07-20	Abia
NIE	Case-based	2009-07-31	40	1	2	R	2009-07-15	0	2009-07-15		2009-07-09	2		2009-07-15	2009-07-17	2009-07-18	2	2	2009-07-20	40.08	2009-07-20	Abia
NIE	Case-based	2009-08-12	1	5	1	R	2009-07-25	1	2009-07-28	2008-11-17	2009-07-23	2		2009-07-29	2009-07-29	2009-07-30	2	2	2009-07-30	1.42	2009-07-30	Abia
NIE	Case-based	2007-12-27	7	7	2	R	2007-12-05	0	2007-12-05		2007-12-03	1	2007-12-05	2007-12-05	2007-12-05	2007-12-06	2	2	2007-12-11	7.58		Abia
NIE	Case-based	2007-12-27	1	0	1	U	2007-12-03	1	2007-12-03	2007-09-12	2007-12-02	2		2007-12-05	2007-12-06	2007-12-06	2	2	2007-12-11	1		Abia
NIE	Case-based	2008-01-10	2	5	2	R	2007-11-20	1	2007-11-27		2007-11-19	2	2007-11-29	2007-11-28	2007-11-29	2007-11-30	2	2	2007-12-05	2.42		Abia
NIE	Case-based	2008-01-10	0	6	1	R	2007-11-07		2007-11-07		2007-11-06	2	2007-11-07	2007-11-08	2007-11-09	2007-11-10	3	2	2007-11-14	0.5		Abia
NIE	Case-based	2009-10-10	0	8	1	U	2009-09-08	1	2009-09-09	2009-09-02	2009-09-05	2		2009-09-13	2009-09-14	2009-09-14	2	2	2009-09-17	0.67	2009-09-17	Abia
NIE	Case-based	2009-10-10	1	1	1	U	2009-09-09	1	2009-09-10	2009-04-10	2009-09-06	2		2009-09-13	2009-09-14	2009-09-14	2	2	2009-09-17	1.08	2009-09-17	Abia
NIE	Case-based	2011-02-04	1	10	M	U	2011-01-05	1	2011-01-06	2009-11-16	2010-12-31	2		2011-01-06			2	2		1.83		Abia
NIE	Case-based	2011-02-04	3	7	M	R	2011-01-03	1	2011-01-03	2008-03-11	2010-12-30	2		2011-01-03	2011-01-09	2011-01-11	2	2	2011-02-16	3.58	2011-02-16	Abia
NIE	Case-based	2011-02-04	1	6	F	U	2011-01-05	1	2011-01-06	2010-04-12	2010-12-31	2		2011-01-06	2011-01-09	2011-01-11	2	2	2011-02-16	1.5	2011-02-16	Abia
NIE	Case-based	2011-02-04	0	10	F	U	2011-01-05	0	2011-01-06		2010-12-29	2		2011-01-06			1	4		0.83		Abia
NIE	Case-based	2011-02-04	11	3	M	R	2010-12-20	1	2010-12-20	2010-06-02	2010-12-19	2		2010-12-21	2011-01-09	2011-01-11	2	2	2011-02-16	11.25	2011-02-16	Abia
NIE	Case-based	2011-02-04	3	9	F	R	2010-12-21	1	2010-12-21	2007-12-01	2010-12-17	2		2010-12-21	2011-01-09	2011-01-11	2	2	2011-02-16	3.75	2011-02-16	Abia
NIE	Case-based	2011-02-04	14	1	M	R	2010-12-20	1	2010-12-20	1997-08-27	2010-12-17	2		2010-12-21	2011-01-11	2011-01-11	2	2	2011-02-16	14.08	2011-02-16	Abia
NIE	Case-based	2011-02-04	1	3	F	R	2010-12-21	0	2010-12-21		2010-12-15	2		2010-12-21	2011-01-09	2011-01-11	1	4	2011-02-16	1.25	2011-02-16	Abia
NIE	Case-based	2011-02-04	0	10	F	R	2010-12-20	1	2010-12-21	2010-08-18	2010-12-15	2		2010-12-21			2	2		0.83		Abia
NIE	Case-based	2011-02-04	0	8	F	R	2010-12-20	0	2010-12-21		2010-12-13	2		2010-12-21	2010-12-21	2010-12-21	1	4	2011-02-16	0.67	2011-02-16	Abia
NIE	Case-based	2011-02-14	6	2	F	R	2011-01-16	1	2011-01-17	2005-08-23	2011-01-14	2		2011-01-18	2011-01-27	2011-01-28	2	2	2011-02-28	6.17	2011-02-28	Abia
NIE	Case-based	2011-05-24	0	10	F	R	2011-05-10	0	2011-05-10		2011-05-07	2		2011-05-14	2011-05-24	2011-05-24	2	5		0.83		Abia
NIE	Case-based	2010-01-13	5	4	1	R	2009-12-19	1	2009-12-20	2005-04-06	2009-12-18	2	2009-12-20	2009-12-22	2009-12-23	2009-12-23	2	2	2009-12-29	5.33	2009-12-29	Abia
NIE	Case-based	2010-01-13	2	0	1	R	2009-12-13	4	2009-12-18	2008-09-11	2009-12-12	2		2009-12-28	2009-12-29	2009-12-29	2	2	2009-12-29	2	2009-12-29	Abia
NIE	Case-based	2010-01-27	1	4	2	R	2009-12-21	1	2009-12-21	2009-05-14	2009-12-19	2	2009-12-22	2009-12-22	2009-12-23	2009-12-24	2	2	2009-12-29	1.33	2009-12-29	Abia
NIE	Case-based	2010-01-27	2	0	F	U	2010-01-12	1	2010-01-12	2008-10-17	2010-01-11	2		2010-01-12	2010-01-14	2010-01-14	2	2	2010-01-14	2	2010-01-14	Abia
NIE	Case-based	2010-01-27	47	8	F	R	2010-01-11	0	2010-01-11		2010-01-10	2		2010-01-13	2010-01-14	2010-01-14	2	2	2010-01-14	47.67	2010-01-14	Abia
NIE	Case-based	2010-01-27	12	4	M	R	2010-01-11	4	2010-01-11	2006-10-25	2010-01-09	2		2010-01-14	2010-01-15	2010-01-15	2	2	2010-01-19	12.33	2010-02-11	Abia
NIE	Case-based	2010-01-27	13	3	M	U	2010-01-20	1	2010-01-20	1997-08-13	2010-01-15	2		2010-01-20	2010-01-22	2010-01-23	2	2	2010-01-26	13.25	2010-01-26	Abia
NIE	Case-based	2010-01-27	12	3	M	R	2010-01-05	1	2010-01-06	2006-10-11	2010-01-04	2		2010-01-10	2010-01-11	2010-01-13	2	2	2010-01-14	12.25	2010-01-14	Abia
NIE	Case-based	2010-03-31	5	11	F	R	2010-01-31	1	2010-01-31	2004-11-28	2010-01-25	2	2010-02-01	2010-02-01	2010-02-02	2010-02-03	2	2	2010-02-04	5.92	2010-02-04	Abia
NIE	Case-based	2008-04-28	5	1	1	R	2008-04-04	1	2008-04-09		2008-04-03	2	2008-04-16	2008-04-15	2008-04-18	2008-04-19	2	2	2008-04-28	5.08	2008-04-19	Abia
NIE	Case-based	2009-04-16	4	0	2	R	2009-04-04	1	2009-04-04	2006-12-10	2009-04-03	2	2009-04-04	2009-04-06	2009-04-08	2009-04-08	2	2	2009-04-14	4	2009-04-14	Abia
NIE	Case-based	2009-04-16	0	9	1	U	2009-04-03	0	2009-04-06		2009-04-01	2		2009-04-06	2009-04-06	2009-04-08	2	2	2009-04-14	0.75	2009-04-14	Abia
NIE	Case-based	2009-04-16	11	9	2	R	2009-03-30	1	2009-03-31	1998-04-12	2009-03-29	2		2009-03-30	2009-04-02	2009-04-03	2	2	2009-04-14	11.75	2009-04-14	Abia
NIE	Case-based	2009-04-16	2	1	1	R	2009-03-31	0	2009-03-31		2009-03-29	2		2009-04-03	2009-04-03	2009-04-04	2	2	2009-04-14	2.08	2009-04-14	Abia
NIE	Case-based	2009-04-16	6	2	1	R	2009-04-01	2	2009-04-01	2009-02-04	2009-03-29	2		2009-04-03	2009-04-03	2009-04-04	2	2	2009-04-14	6.17	2009-04-14	Abia
NIE	Case-based	2009-10-17	7	0	1	R	2009-10-11	0	2009-10-11		2009-10-10	2	2009-10-13	2009-10-13	2009-10-14	2009-10-16	2	2	2009-10-23	7	2009-10-23	Abia
NIE	Case-based	2009-10-17	15	5	2	R	2009-10-04	0	2009-10-05		2009-10-04	2		2009-10-07	2009-10-08	2009-10-09	2	2	2009-10-23	15.42	2009-10-23	Abia
NIE	Case-based	2009-10-17	19	3	1	R	2009-10-02	1	2009-10-02		2009-09-24	2		2009-10-07	2009-10-08	2009-10-09	2	2	2009-10-23	19.25	2009-10-23	Abia
NIE	Case-based	2009-10-27	2	0	1	R	2009-01-26	0	2009-01-26		2009-01-18	2		2009-01-27	2009-01-28	2009-01-28	2	2	2009-01-30	2	2009-01-30	Abia
NIE	Case-based	2009-10-27	1	6	2	R	2009-08-19	0	2009-08-19		2009-08-17	2		2009-08-21	2009-08-22	2009-08-23	2	2	2009-08-26	1.5	2009-08-26	Abia
NIE	Case-based	2009-10-27	21	3	2	R	2009-09-18	1	2009-09-18	1989-04-12	2009-09-14	2		2009-09-18	2009-09-22	2009-09-23	2	1	2009-09-23	21.25	2009-09-23	Abia
NIE	Case-based	2009-10-27	30	3	2	R	2009-07-15	1	2009-07-15	2008-01-15	2009-07-12	2		2009-07-16	2009-07-18	2009-07-18	2	2	2009-07-20	30.25	2009-07-20	Abia
NIE	Case-based	2009-10-27	4	4	2	R	2009-10-15	3	2009-10-17	2009-05-05	2009-10-13	2		2009-10-20	2009-10-21	2009-10-21	2	2	2009-10-23	4.33	2009-10-23	Abia
NIE	Case-based	2009-11-03	17	7	2	R	2009-08-24	1	2009-08-24	2006-10-31	2009-08-23	2		2009-08-24	2009-08-25	2009-08-25	2	2	2009-08-26	17.58	2009-08-26	Abia
NIE	Case-based	2010-04-07	29	3	2	R	2009-12-21	0	2009-12-21		2009-11-30	2		2009-12-22	2009-12-23		5	2		29.25		Abia
NIE	Case-based	2010-04-27	45	0	F	R	2010-04-16	0	2010-04-16		2010-04-14	2		2010-04-19	2010-04-20	2010-04-21	2	2	2010-04-29	45	2010-04-29	Abia
NIE	Case-based	2010-04-27	1	10	M	R	2010-04-12	2	2010-04-12	2010-03-06	2010-04-09	2		2010-04-18	2010-04-19	2010-04-21	2	2	2010-04-29	1.83	2010-04-29	Abia
NIE	Case-based	2010-04-27	0	7	M	R	2010-04-12	0	2010-04-12		2010-04-05	2		2010-04-18	2010-04-19	2010-04-21	2	2	2010-04-29	0.58	2010-04-29	Abia
NIE	Case-based	2009-12-22	6	2	1	R	2009-12-11	1	2009-12-11	2004-07-16	2009-12-10	2		2009-12-11	2009-12-12	2009-12-13	2	2	2009-12-22	6.17	2009-12-22	Abia
NIE	Case-based	2009-12-22	3	0	2	R	2009-12-05	1	2009-12-05	2007-10-07	2009-12-04	2	2009-12-07	2009-12-05	2009-12-08	2009-12-10	2	2	2009-12-22	3	2009-12-22	Abia
NIE	Case-based	2009-12-22	6	6	2	U	2009-11-28	1	2009-12-01		2009-11-26	2		2009-12-03	2009-12-04	2009-12-06	2	1	2009-12-22	6.5	2009-12-22	Abia
NIE	Case-based	2009-12-22	4	4	1	R	2009-12-05	1	2009-12-05	2007-10-09	2009-11-29	2	2009-12-07	2009-12-06	2009-12-08	2009-12-10	2	1	2009-12-22	4.33	2009-12-22	Abia
NIE	Case-based	2009-12-22	20	0	1	R	2009-11-29	0	2009-12-01		2009-11-28	2		2009-12-03	2009-12-04	2009-12-06	2	2	2009-12-22	20	2009-12-22	Abia
NIE	Case-based	2009-12-23	31	8	1	R	2009-12-04	0	2009-12-05		2009-12-02	1		2009-12-08	2009-12-09	2009-12-09	2	2	2009-12-22	31.67	2009-12-22	Abia
NIE	Case-based	2009-12-23	18	9	1	R	2009-11-30	1	2009-11-30		2009-11-23	2		2009-11-30	2009-12-01	2009-12-01	2	2	2009-10-05	18.75	2009-10-05	Abia
NIE	Case-based	2009-12-23	2	2	2	R	2009-11-25	0	2009-11-25		2009-11-18	1	2009-12-08	2009-12-08	2009-12-09	2009-12-09	2	2	2009-12-22	2.17	2009-12-22	Abia
NIE	Case-based	2009-12-23	29	0	2	R	2009-12-04	0	2009-12-05		2009-11-16	2	2009-12-07	2009-11-20	2009-12-09	2009-12-10	2	2	2009-12-22	29	2009-12-22	Abia
NIE	Case-based	2009-12-23	3	1	2	U	2009-12-07	1	2009-12-08	2007-09-03	2009-12-05	2		2009-12-08	2009-12-09	2009-12-10	2	2	2009-12-22	3.08	2009-12-22	Abia
NIE	Case-based	2009-12-23	3	2	2	U	2009-12-06	2	2009-12-06	2008-02-22	2009-12-04	2		2009-12-06	2009-12-07	2009-12-09	2	2	2009-12-22	3.17	2009-12-22	Abia
NIE	Case-based	2009-12-30	20	2	2	U	2009-12-21	1	2009-12-21	1990-08-08	2009-12-19	2		2009-12-21	2009-12-23	2009-12-24	2	2	2009-12-29	20.17	2009-12-29	Abia
NIE	Case-based	2009-12-30	1	4	2	R	2009-12-14	0	2009-12-14		2009-12-10	2		2009-12-14	2009-12-15	2009-12-15	2	2	2009-12-22	1.33	2009-12-22	Abia
NIE	Case-based	2009-12-30	0	7	2	R	2009-12-09	1	2009-12-11	2006-10-13	2009-11-27	2		2009-11-30	2009-12-15	2009-12-15	2	2	2009-12-22	0.58	2009-12-22	Abia
NIE	Case-based	2009-12-30	0	9	2	R	2009-12-07	0	2009-12-10		2009-12-07	2		2009-12-14	2009-12-15	2009-12-15	2	2	2009-12-22	0.75	2009-12-22	Abia
NIE	Case-based	2009-12-30	20	4	1	R	2009-12-08	1	2009-12-11		2009-12-04	2		2009-12-12	2009-12-15	2009-12-16	2	2	2009-12-22	20.33	2009-12-22	Abia
NIE	Case-based	2009-12-30	18	1	1	R	2009-12-10	1	2009-12-11		2009-12-03	2		2009-12-11	2009-12-15	2009-12-15	2	2	2009-12-22	18.08	2009-12-22	Abia
NIE	Case-based	2011-02-20	3	36	F	R	2011-01-10	1	2011-01-11	2008-08-15	2011-01-07	1		2011-01-12	2011-01-13	2011-01-28	1	4	2011-02-28		2011-02-28	Abia
NIE	Case-based	2011-12-19	13	0	F	R	2011-11-23	2	2011-11-23	2006-10-08	2011-11-20	2		2011-11-23	2011-12-15	2011-12-15	2	5	2012-03-13		2012-03-13	Abia
NIE	Case-based	2011-12-19	8	0	F	R	2011-11-27	1	2011-11-28	2011-06-26	2011-11-15	2		2011-11-28	2011-12-15	2011-12-15	2	5	2012-03-13		2012-03-13	Abia
NIE	Case-based	2011-12-19	10	0	F	R	2011-11-28	1	2011-11-28	2011-11-25	2011-11-25	2		2011-11-29	2011-12-13		2	5	2012-03-13		2012-03-13	Abia
NIE	Case-based	2011-12-19	16	0	F	R	2011-11-28	1	2011-11-28	2006-06-23	2011-11-26	2		2011-11-29	2011-12-13		2	5	2012-03-13		2012-03-13	Abia
NIE	Case-based	2011-12-19	6	9	M	R	2011-11-24	1	2011-11-24	2009-02-22	2011-11-23	2		2011-11-27	2011-12-13		2	5	2012-03-13		2012-03-13	Abia
NIE	Case-based	2011-12-19	9	5	M	R	2011-11-25	1	2011-11-25	2011-11-25	2011-11-22	2		2011-11-29	2011-12-13		2	5	2012-03-13	9.42	2012-03-13	Abia
NIE	Case-based	2011-12-19	4	11	M	R	2011-11-22	1	2011-11-22	2007-10-06	2011-11-21	2		2011-11-28	2011-12-13		2	5	2012-03-13	4.92	2012-03-13	Abia
NIE	Case-based	2011-12-28	26	0	F	R	2011-11-23	0	2011-11-23		2011-11-22	2	2011-11-23	2011-11-23	2011-11-23	2011-11-30	2	5	2012-03-13	26	2012-03-13	Abia
NIE	Case-based	2011-02-24	0	9	M	R	2011-02-01	0	2011-02-01		2011-01-29	2		2011-02-02	2011-02-11	2011-02-11	2	2	2011-03-08	0.75	2011-03-08	Abia
NIE	Case-based	2009-11-09	21	9	2	R	2009-10-24	9	2009-10-26		2009-10-24	2		2009-10-28	2009-10-29	2009-10-29	2	2	2009-11-23	21.75	2009-11-23	Abia
NIE	Case-based	2009-11-11	5	7	1	U	2009-10-26	1	2009-10-26	2005-01-26	2009-10-25	2	2009-10-27	2009-10-27	2009-10-28	2009-10-29	2	2	2009-11-23	5.58	2009-11-23	Abia
NIE	Case-based	2009-11-11	2	0	2	U	2009-10-27	2	2009-10-27	2009-02-01	2009-10-26	2		2009-10-26	2009-10-27	2009-10-29	2	2	2009-11-23	2	2009-11-23	Abia
NIE	Case-based	2009-11-11	0	7	1	U	2009-10-19	0	2009-10-19		2009-10-16	2		2009-10-20	2009-10-21	2009-10-22	2	2	2009-10-23	0.58	2009-10-23	Abia
NIE	Case-based	2008-09-03	0	9	1	U	2008-08-20	1	2008-08-20	2008-08-13	2008-08-13	2	2008-08-28	2008-08-20	2008-08-28	2008-08-29	2	2	2008-09-03	0.75	2008-08-29	Abia
NIE	Case-based	2008-09-02	0	9	2	R	2008-08-22	0	2008-08-22		2008-08-21	2	2008-08-22	2008-08-24	2008-08-25	2008-08-25	2	2	2008-09-01	0.75	2008-08-25	Abia
NIE	Case-based	2008-11-04	12	144	1	R	2008-10-19	1	2008-10-20	1997-07-14	2008-10-18	2		2008-10-22	2008-10-23	2008-10-23	3	2	2008-10-24	12.33	2008-10-23	Abia
NIE	Case-based	2008-11-04	3	8	1	R	2008-10-12	1	2008-10-20	2005-11-10	2008-10-12	2		2008-10-22	2008-10-23	2008-10-23	2	2	2008-10-24	3.67	2008-10-23	Abia
NIE	Case-based	2008-11-04	3	11	2	R	2008-10-20	1	2008-10-20		2008-10-20	2	2008-10-19	2008-10-31	2008-11-07	2008-11-09	2	2	2008-11-13	3.92	2008-11-09	Abia
NIE	Case-based	2010-01-13	9	0	2	R	2009-12-20	0	2009-12-21		2009-12-18	2		2009-12-22	2009-12-23	2009-12-24	2	3	2009-12-29	9	2009-12-29	Abia
NIE	Case-based	2010-01-13	3	2	2	U	2009-12-19	2	2009-12-19	2008-02-13	2009-12-13	2		2009-12-20	2009-12-21	2009-12-24	2	2	2009-12-29	3.17	2009-12-29	Abia
NIE	Case-based	2010-01-13	0	9	1	U	2009-12-18	0	2009-12-18		2009-12-15	1		2009-12-19	2009-12-21	2009-12-24	2	2	2009-12-29	0.75	2009-12-29	Abia
NIE	Case-based	2010-02-03	1	6	M	U	2010-01-16	1	2010-01-17	2009-04-09	2010-01-15	2		2010-01-18	2010-01-19	2010-01-21	2	2	2010-01-22	1.5	2010-02-04	Abia
NIE	Case-based	2010-02-03	0	10	M	U	2010-01-18	1	2010-01-18	2009-12-15	2010-01-15	2		2010-01-19	2010-01-20	2010-01-21	2	2	2010-01-22	0.83	2010-01-22	Abia
NIE	Case-based	2010-02-03	0	9	M	U	2010-01-26	0	2010-01-26		2010-01-23	2		2010-01-27	2010-01-28	2010-01-28	2	2	2010-02-02	0.75	2010-02-02	Abia
NIE	Case-based	2010-02-03	4	0	F	R	2010-01-18	1	2010-01-18	2009-02-26	2010-01-17	2		2010-01-20	2010-01-21	2010-01-23	2	2	2010-01-26	4	2010-01-26	Abia
NIE	Case-based	2008-02-06	0	9	2	U	2007-07-24	0	2007-07-26		2007-07-23	2		2007-07-27	2007-07-28	2007-07-28	2	2	2007-08-04	0.75		Abia
NIE	Case-based	2008-02-12	1	1	1	R	2007-09-11	1	2007-09-11	2007-04-19	2007-09-11	2		2007-09-12	2007-09-12	2007-09-13	2	2	2007-10-02	1.08		Abia
NIE	Case-based	2008-02-12	8	0	1	R	2007-09-10	1	2007-09-11	2006-10-21	2007-09-08	2		2007-09-12	2007-09-12	2007-09-13	2	2	2007-10-02	8		Abia
NIE	Case-based	2008-02-12	57	0	2	R	2007-07-11		2007-07-23		2007-07-10	2	2007-07-24	2007-07-26	2007-07-27	2007-07-27	2	2	2007-08-04	57		Abia
NIE	Case-based	2008-02-12	7	5	2	R	2007-07-21	2	2007-07-23	2006-10-24	2007-07-07	2		2007-07-24	2007-07-25	2007-07-25	2	2	2007-07-28	7.42		Abia
NIE	Case-based	2008-02-12	0	10	2	R	2007-03-09		2007-03-09		2007-03-09	2		2007-03-11	2007-03-13	2007-03-14	2	1	2007-03-25	0.83		Abia
NIE	Case-based	2008-02-12	6	5	1	R	2007-07-13	4	2007-07-13	2006-10-05	2007-07-10	2		2007-07-18	2007-07-19	2007-07-19	2	3	2007-07-28	6.42		Abia
NIE	Case-based	2008-02-12	1	0	1	R	2008-01-24		2008-01-24		2008-01-22	2		2008-01-24	2008-01-26	2008-01-26	2	2	2008-01-29	1	2008-01-26	Abia
NIE	Case-based	2008-02-12	29	2	2	U	2008-01-22	1	2008-01-30		2008-01-21	2	2008-02-01	2008-01-30	2008-01-31	2008-02-01	2	2	2008-02-04	29.17	2008-02-01	Abia
NIE	Case-based	2008-02-12	1	1	1	U	2008-01-21		2008-01-21		2008-01-18	2		2008-01-21	2008-01-22	2008-01-24	2	2	2008-01-25	1.08	2008-01-24	Abia
NIE	Case-based	2008-02-12	1	1	2	R	2008-01-20	1	2008-01-21	2007-09-15	2008-01-19	2	2008-01-22	2008-01-22	2008-01-23	2008-01-24	2	2	2008-01-25	1.08	2008-01-24	Abia
NIE	Case-based	2010-02-09	0	10	F	U	2010-01-26	0	2010-01-26		2010-01-25	2	2010-02-01	2010-01-31	2010-02-01	2010-02-03	2	2	2010-02-04	0.83	2010-02-11	Abia
NIE	Case-based	2010-02-09	2	1	F	R	2010-01-29	1	2010-01-31	2010-09-30	2010-01-25	2		2010-02-01	2010-02-02	2010-02-03	2	1	2010-02-04	2.08	2010-02-22	Abia
NIE	Case-based	2010-02-09	25	8	F	R	2010-01-28	0	2010-01-29		2010-01-27	2		2010-01-31	2010-02-01	2010-02-03	2	2	2010-02-04	25.67	2010-02-04	Abia
NIE	Case-based	2010-02-16	5	10	F	R	2010-02-02	0	2010-02-02		2010-02-01	2		2010-02-08	2010-02-09	2010-02-09	2	2	2010-02-11	5.83	2010-02-11	Abia
NIE	Case-based	2010-02-16	27	3	F	U	2010-02-05	3	2010-02-06	2008-12-12	2010-02-03	2		2010-02-08	2010-02-09	2010-02-09	2	3	2010-02-11	27.25	2010-02-11	Abia
NIE	Case-based	2010-02-16	6	0	F	R	2010-02-02	0	2010-02-02		2010-01-30	2		2010-02-08	2010-02-09	2010-02-09	2	2	2010-02-11	6	2010-02-11	Abia
NIE	Case-based	2010-02-16	9	0	M	R	2010-02-02	0	2010-02-02		2010-01-31	2		2010-02-08	2010-02-09	2010-02-09	2	2	2010-02-11	9	2010-01-22	Abia
NIE	Case-based	2008-09-17	1	4	2	U	2008-09-05	1	2008-09-05	2008-01-13	2008-09-04	2		2008-09-05	2008-09-11	2008-09-11	3	3	2008-09-15	1.33	2008-09-11	Abia
NIE	Case-based	2008-09-30	6	2	1	R	2008-09-09	1	2008-09-15	2005-04-22	2008-09-07	2		2008-09-10	2008-09-18	2008-09-18	2	2	2008-09-19	6.17	2008-09-18	Abia
NIE	Case-based	2008-06-17	0	8	2	U	2008-05-29	0	2008-05-29		2008-05-25	2	2008-06-02	2008-06-02	2008-06-03	2008-06-03	2	2	2008-06-06	0.67	2008-06-03	Abia
NIE	Case-based	2010-02-23	4	9	M	R	2010-02-08	0	2010-02-08		2010-01-20	2	2010-02-08	2010-02-08	2010-02-09	2010-02-10	2	2	2010-02-11	4.75	2010-02-11	Abia
NIE	Case-based	2010-02-23	1	11	M	U	2010-02-06	1	2010-02-06	2008-12-20	2010-02-05	2	2010-02-08	2010-02-07	2010-02-08	2010-02-10	2	2	2010-02-11	1.92	2010-03-01	Abia
NIE	Case-based	2010-02-23	1	0	F	R	2010-01-26	1	2010-01-26	2010-01-26	2010-01-19	2	2010-02-10	2010-02-10	2010-02-11	2010-02-11	2	2	2010-02-16	1	2010-02-16	Abia
NIE	Case-based	2010-02-23	30	0	M	R	2010-02-02	1	2010-02-03		2010-01-29	2		2010-02-09	2010-02-10	2010-02-10	2	2	2010-02-11	30	2010-02-11	Abia
NIE	Case-based	2010-02-23	1	4	M	R	2010-02-03	1	2010-02-05	2009-08-22	2010-01-30	2		2010-02-05	2010-02-10	2010-02-10	2	2	2010-02-11	1.33	2010-02-11	Abia
NIE	Case-based	2012-03-20	1	5	M	U	2012-03-13	1	2012-03-13	2011-08-03	2012-03-11	2	2012-03-14	2012-03-13	2012-03-13	2012-03-21	2	5	2012-05-17	1.42		Abia
NIE	Case-based	2011-04-06	5	0	F	R	2011-02-26	0	2011-02-26		2011-02-20	2		2011-02-27	2011-03-17	2011-03-18	1	4	2011-07-02	5	2011-07-02	Abia
NIE	Case-based	2011-04-06	3	5	F	R	2011-02-16	1	2011-02-22	2008-02-02	2011-02-12	2		2011-02-22	2011-03-17	2011-03-18	1	4	2011-07-02	3.42	2011-07-02	Abia
NIE	Case-based	2011-04-06	4	10	M	R	2011-02-26	1	2011-02-26	2007-05-15	2011-02-24	2		2011-02-27	2011-03-17	2011-03-18	1	4	2011-07-02	4.83	2011-07-02	Abia
NIE	Case-based	2011-04-06	6	1	M	R	2011-02-26	0	2011-02-26		2011-02-19	2		2011-02-27	2011-03-17	2011-03-18	1	4	2011-07-02	6.08	2011-07-02	Abia
NIE	Case-based	2011-04-06	27	0	F	R	2011-02-17	0	2011-02-21		2011-02-15	1	2011-02-21	2011-02-21	2011-02-21	2011-03-02	2	5		27		Abia
NIE	Case-based	2011-04-06	5	10	M	R	2011-02-28	1	2011-02-28	2006-08-10	2011-02-26	2		2011-02-28	2011-02-28	2011-03-02	2	2	2011-07-01	5.83	2011-07-01	Abia
NIE	Case-based	2011-05-02	1	2	F	R	2011-03-18	0	2011-03-19		2011-03-16	2		2011-03-20	2011-04-06	2011-04-07	2	2		1.17		Abia
NIE	Case-based	2011-05-02	3	10	F	R	2011-03-09	1	2011-03-10	2011-02-26	2011-02-24	2		2011-03-10	2011-03-17	2011-03-18	2	1	2011-07-02	3.83	2011-07-02	Abia
NIE	Case-based	2011-05-02	7	0	M	R	2011-03-01	0	2011-03-02		2011-02-27	1		2011-03-04	2011-03-17	2011-03-18	1	4	2011-07-02	7	2011-07-02	Abia
NIE	Case-based	2011-05-02	3	9	M	R	2011-03-01	0	2011-03-02		2011-02-27	1		2011-03-04	2011-03-17	2011-03-18	1	4	2011-07-02	3.75	2011-07-02	Abia
NIE	Case-based	2011-05-02	3	4	M	R	2011-03-02	0	2011-03-02		2011-03-02	1		2011-03-04	2011-03-17	2011-03-18	2	1	2011-07-02	3.33	2011-07-02	Abia
NIE	Case-based	2011-05-02	10	4	F	R	2011-03-03	0	2011-03-04		2011-03-01	2	2011-03-04	2011-03-04	2011-03-17	2011-03-18	2	1	2011-07-02	10.33	2011-07-02	Abia
NIE	Case-based	2011-05-02	9	11	F	U	2011-03-03	0	2011-03-04		2011-03-01	2	2011-03-04	2011-03-04	2011-03-17	2011-03-18	2	5	2011-07-02	9.92	2011-07-02	Abia
NIE	Case-based	2011-05-02	3	2	F	U	2011-03-25	1	2011-03-25	2008-11-18	2011-03-23	2		2011-03-25	2011-04-06	2011-04-07	1	4	2011-12-01	3.17	2011-12-01	Abia
NIE	Case-based	2011-05-03	0	10	M	U	2011-03-25	0	2011-03-25		2011-03-22	2		2011-03-25	2011-04-06	2011-04-07	1	4	2011-12-01	0.83	2011-12-01	Abia
NIE	Case-based	2011-05-03	0	11	M	U	2011-03-24	0	2011-03-24		2011-03-20	2		2011-03-24	2011-04-06	2011-04-07	2	3	2012-01-16	0.92	2012-01-16	Abia
NIE	Case-based	2011-05-03	1	0	M	U	2011-02-28	0	2011-02-28		2011-02-26	2		2011-03-01	2011-03-17	2011-03-18	1	4	2011-07-02	1	2011-07-02	Abia
NIE	Case-based	2011-05-03	1	10	M	R	2011-02-22	0	2011-02-23		2011-02-15	2		2011-02-28	2011-02-28	2011-03-02	2	5	2011-06-14	1.83	2011-06-14	Abia
NIE	Case-based	2011-05-03	3	0	F	R	2011-02-24	0	2011-02-25		2011-02-22	2		2011-02-25	2011-02-28	2011-03-02	2	5	2011-06-14	3	2011-06-14	Abia
NIE	Case-based	2011-05-03	0	3	M	R	2011-02-28	0	2011-02-28		2011-02-27	2		2011-02-28	2011-02-28	2011-03-02	2	5	2011-06-14	0.25	2011-06-14	Abia
NIE	Case-based	2011-05-03	0	11	M	U	2011-02-26	0	2011-02-26		2011-02-12	2		2011-02-26	2011-03-02	2011-03-02	2	5	2011-06-14	0.92	2011-06-14	Abia
NIE	Case-based	2011-05-03	2	6	F	U	2011-02-28	0	2011-02-28		2011-02-23	2	2011-02-28	2011-02-28	2011-02-28	2011-03-02	2	5	2011-06-14	2.5	2011-06-14	Abia
NIE	Case-based	2011-05-03	2	9	M	U	2011-02-26	0	2011-02-26		2011-02-22	2	2011-02-26	2011-02-26	2011-03-02	2011-03-02	2	5	2011-06-14	2.75	2011-06-14	Abia
NIE	Case-based	2011-05-03	3	0	F	R	2011-02-22	0	2011-02-22		2011-02-17	2	2011-02-24	2011-02-22	2011-02-22	2011-03-02	2	5	2011-06-14	3	2011-06-14	Abia
NIE	Case-based	2011-05-03	0	9	F	U	2011-02-20	0	2011-02-20		2011-02-18	2	2011-02-21	2011-02-21	2011-02-21	2011-03-02	1	4	2011-06-14	0.75	2011-06-16	Abia
NIE	Case-based	2011-05-03	1	3	M	R	2011-02-21	0	2011-02-21		2011-02-18	2		2011-02-21	2011-02-21	2011-03-02	2	5	2011-06-14	1.25	2011-06-14	Abia
NIE	Case-based	2011-05-03	1	3	M	R	2011-02-23	1	2011-02-23	2010-10-27	2011-02-18	2		2011-02-23	2011-02-23	2011-02-23	2	5		1.25		Abia
NIE	Case-based	2011-05-03	12	0	M	R	2011-02-25	1	2011-02-25	1999-10-13	2011-02-23	2	2011-02-25	2011-02-25	2011-02-25	2011-03-02	2	5	2011-06-14	12	2011-06-14	Abia
NIE	Case-based	2011-05-03	1	1	M	R	2011-02-22	1	2011-02-22	2011-02-02	2011-02-17	2	2011-02-23	2011-02-23	2011-02-23	2011-03-02	2	3	2011-06-14	1.08	2011-06-14	Abia
NIE	Case-based	2011-05-03	2	0	M	U	2011-03-01	1	2011-03-01	2010-02-11	2011-02-25	2		2011-03-01	2011-03-17	2011-03-18	1	4	2011-07-02	2	2011-07-02	Abia
NIE	Case-based	2011-05-03	5	11	M	R	2011-02-28	1	2011-03-02	2006-03-22	2011-02-23	1		2011-03-04	2011-03-17	2011-03-18	2	1	2011-07-02	5.92	2011-07-02	Abia
NIE	Case-based	2011-05-03	5	7	M	R	2011-03-02	0	2011-03-02		2011-03-01	1		2011-03-04	2011-03-17	2011-03-18	2	1	2011-07-02	5.58	2011-07-02	Abia
NIE	Case-based	2011-05-03	1	4	F	U	2011-02-28	1	2011-02-28	2010-09-08	2011-02-27	2		2011-03-02	2011-03-17	2011-03-18	1	4	2011-07-02	1.33	2011-07-02	Abia
NIE	Case-based	2011-05-03	4	5	M	R	2011-02-28	1	2011-03-02	2007-07-27	2011-02-27	2		2011-03-02	2011-03-03	2011-03-18	2	3	2011-07-02	4.42	2011-07-02	Abia
NIE	Case-based	2010-05-05	1	9	M	R	2010-04-13	1	2010-04-15	2009-04-02	2010-04-09	2	2010-04-15	2010-04-17	2010-04-20	2010-04-21	2	2	2010-04-29	1.75	2010-04-29	Abia
NIE	Case-based	2010-05-05	25	6	F	R	2010-04-14	1	2010-04-14	2006-10-07	2010-04-13	2		2010-04-20	2010-04-21	2010-04-21	1	1	2010-04-29	25.5	2010-04-29	Abia
NIE	Case-based	2010-05-12	0	4	F	U	2010-04-22	0	2010-04-23		2010-04-21	2	2010-04-23	2010-04-23	2010-04-26	2010-04-27	2	2	2010-04-29	0.33	2010-04-29	Abia
NIE	Case-based	2012-03-06	9	1	M	R	2012-02-29	0	2012-02-29		2012-02-28	2	2012-02-29	2012-02-29	2012-02-29		2	5	2012-04-24	9.08	2012-04-24	Abia
NIE	Case-based	2012-03-06	3	4	M	R	2012-02-11	0	2012-02-12		2012-02-08	2	2012-02-12	2012-02-12	2012-02-13	2012-04-19	2	5	2012-04-19	3.33		Abia
NIE	Case-based	2012-03-06	0	3	M	R	2012-02-29	2	2012-02-29	2012-01-18	2012-02-27	2	2012-02-29	2012-02-29	2012-02-29		2	5	2012-04-24	0.25	2012-04-24	Abia
NIE	Case-based	2012-03-06	9	0	M	R	2012-02-18	1	2012-02-19	2004-01-08	2012-02-16	2		2012-02-19	2012-02-19		2	5	2012-04-19	9	2012-04-19	Abia
NIE	Case-based	2012-03-06	3	1	F	R	2012-02-18	1	2012-02-18	2011-06-14	2012-02-17	2		2012-02-18	2012-02-18		2	5	2012-04-19	3.08	2012-04-19	Abia
NIE	Case-based	2012-03-06	3	9	F	R	2012-02-06	1	2012-02-09	2009-01-14	2012-01-31	2		2012-02-09	2012-02-14	2012-04-19	2	5	2012-04-19	3.75		Abia
NIE	Case-based	2012-03-06	4	9	M	R	2012-02-08	1	2012-02-11	2008-02-28	2012-02-04	2	2012-02-13	2012-02-11	2012-02-13	2012-04-19	2	5	2012-04-19	4.75		Abia
NIE	Case-based	2012-03-06	4	9	M	R	2012-02-10	1	2012-02-11	2008-02-28	2012-02-06	2	2012-02-13	2012-02-11	2012-02-13	2012-04-19	2	5	2012-04-19	4.75		Abia
NIE	Case-based	2012-03-06	1	3	F	U	2012-02-08	1	2012-02-08	2011-08-16	2012-02-04	2		2012-02-08	2012-02-14	2012-04-19	2	5	2012-04-19	1.25		Abia
NIE	Case-based	2012-03-06	2	0	M	R	2012-03-04	1	2012-03-04	2011-02-03	2012-03-02	2	2012-03-04	2012-03-05	2012-03-05		2	5	2012-04-24	2	2012-04-24	Abia
NIE	Case-based	2012-03-06	35	1	F	R	2012-02-01	0	2012-02-01		2012-01-31	2		2012-02-02	2012-02-03	2012-04-19	2	5	2012-04-19	35.08		Abia
NIE	Case-based	2012-03-06	6	0	F	R	2012-01-30	0	2012-01-31		2012-01-28	2		2012-02-10	2012-02-14	2012-04-19	2	5	2012-04-19	6		Abia
NIE	Case-based	2010-05-12	1	6	M	R	2010-04-20	0	2010-04-21		2010-04-17	2		2010-04-26	2010-04-27	2010-04-27	2	2	2010-04-29	1.5	2010-04-29	Abia
NIE	Case-based	2010-05-12	33	0	F	R	2010-04-17	0	2010-04-20		2010-04-07	2		2010-04-26	2010-04-27	2010-04-27	2	2	2010-04-29	33	2010-04-29	Abia
NIE	Case-based	2010-05-12	49	0	F	R	2010-04-26	0	2010-05-04		2010-04-25	2		2010-05-07	2010-05-10	2010-05-10	2	2	2010-04-29	49	2010-04-29	Abia
NIE	Case-based	2010-05-25	11	1	F	R	2010-05-17	1	2010-05-17	2000-01-24	2010-05-15	2		2010-05-18	2010-05-20	2010-05-22	2	1	2010-06-14	11.08	2010-06-14	Abia
NIE	Case-based	2010-06-08	2	9	F	R	2010-05-29	1	2010-05-29	2008-06-18	2010-05-27	2		2010-05-29	2010-05-30	2010-05-31	2	3	2010-06-14	2.75	2020-06-14	Abia
NIE	Case-based	2010-06-08	1	5	F	U	2010-05-24	1	2010-05-24	2009-10-28	2010-05-20	2		2010-05-24	2010-05-27	2010-05-27	2	2	2010-06-14	1.42	2010-06-14	Abia
NIE	Case-based	2010-06-08	3	3	F	R	2010-05-24	0	2010-05-24		2010-05-20	2		2010-05-24	2010-05-26	2010-05-27	2	2	2010-06-14	3.25	2020-06-14	Abia
NIE	Case-based	2010-06-08	0	5	F	U	2010-05-11	0	2010-05-11		2010-05-10	2		2010-05-15	2010-05-18	2010-05-19	2	2	2010-06-14	0.42	2010-06-14	Abia
NIE	Case-based	2011-02-16	1	8	M	R	2011-01-19	0	2011-01-19		2011-01-13	2		2011-01-23	2011-01-25	2011-01-28	1	4	2011-02-28	1.67	2011-02-28	Abia
NIE	Case-based	2011-02-16	2	1	M	R	2011-01-22	0	2011-01-22		2011-01-15	2		2011-01-23	2011-01-25	2011-01-28	1	4	2011-02-28	2.08	2011-02-28	Abia
NIE	Case-based	2011-02-16	1	1	M	R	2011-01-03	1	2011-01-03	2010-09-22	2011-01-01	2		2011-01-03	2011-01-11	2011-01-11	2	5	2011-02-21	1.08	2011-02-21	Abia
NIE	Case-based	2011-02-16	9	3	M	R	2011-01-05	0	2011-01-05		2011-01-02	2		2011-01-06	2011-01-11	2011-01-11	2	2	2011-02-21	9.25	2011-02-21	Abia
NIE	Case-based	2011-02-16	2	6	M	R	2011-01-29	0	2011-01-29		2011-01-26	2		2011-01-31	2011-02-11	2011-02-11	1	4	2011-03-08	2.5	2011-03-08	Abia
NIE	Case-based	2011-02-22	5	60	M	R	2011-01-14	1	2011-01-14	2007-04-05	2011-01-08	2	2011-02-23	2011-01-14	2011-01-28	2011-01-28	1	4	2011-02-28		2011-02-28	Abia
NIE	Case-based	2011-02-23	1	12	M	R	2011-01-14	1	2011-01-14	2010-11-03	2011-01-10	1	2011-02-23	2011-01-14	2011-01-28	2011-01-28	2	1	2011-02-28		2011-02-28	Abia
NIE	Case-based	2011-02-23	3	36	F	U	2011-01-24	1	2011-01-24	2008-04-10	2011-01-23	2		2011-01-24	2011-01-28	2011-01-28	2	2	2011-02-28		2011-02-28	Abia
NIE	Case-based	2011-02-24	0	1	M	R	2011-02-01	0	2011-02-02		2011-01-27	2		2011-02-02	2011-02-11	2011-02-11	2	2	2011-03-08	0.08	2011-03-08	Abia
NIE	Case-based	2011-02-24	7	8	M	R	2011-01-28	1	2011-01-31	2004-04-05	2011-01-25	2		2011-02-01	2011-02-11	2011-02-11	2	3	2011-03-08	7.67	2011-03-08	Abia
NIE	Case-based	2011-02-24	3	3	M	R	2011-01-30	0	2011-01-31		2011-01-26	2		2011-01-31	2011-02-01	2011-02-11	2	1	2011-03-08	3.25	2011-03-08	Abia
NIE	Case-based	2011-02-24	0	10	M	R	2011-01-30	0	2011-01-31		2011-01-14	2		2011-01-31	2011-02-01	2011-02-11	2	2	2011-03-08	0.83	2011-03-08	Abia
NIE	Case-based	2011-02-24	5	1	F	R	2011-01-30	0	2011-01-31		2011-01-19	2		2011-01-31	2011-02-01	2011-02-11	2	1	2011-03-08	5.08	2011-03-08	Abia
NIE	Case-based	2011-03-01	1	10	M	R	2011-01-17	1	2011-01-18	2010-03-17	2011-01-09	2		2011-01-18	2011-01-28	2011-01-28	1	4	2011-02-28	1.83	2011-02-28	Abia
NIE	Case-based	2011-03-01	2	10	F	R	2011-01-07	1	2011-01-10	2009-02-10	2011-01-03	2		2011-01-11	2011-01-28	2011-01-28	2	3	2011-02-28	2.83	2011-02-28	Abia
NIE	Case-based	2011-03-01	25	0	F	R	2011-01-08	0	2011-01-10		2011-01-05	2		2011-01-11	2011-01-28	2011-01-28	2	3	2011-02-28	25	2011-02-28	Abia
NIE	Case-based	2011-03-01	14	4	F	R	2011-01-13	1	2011-01-14	1997-06-10	2011-01-11	2		2011-01-14	2011-01-16	2011-01-28	2	1	2011-02-28	14.33	2011-02-28	Abia
NIE	Case-based	2011-03-01	3	7	M	R	2011-01-13	0	2011-01-14		2011-01-04	2	2011-01-14	2011-01-14	2011-01-14	2011-01-28	1	4	2011-02-28	3.58	2011-02-28	Abia
NIE	Case-based	2011-03-01	0	9	F	R	2011-01-13	0	2011-01-14		2011-01-10	2		2011-01-14	2011-01-14	2011-01-28	2	2	2011-02-28	0.75	2011-02-28	Abia
NIE	Case-based	2011-03-01	8	0	F	R	2011-01-05	1	2011-01-05	2006-12-15	2011-01-04	2		2011-01-14	2011-01-14	2011-01-28	2	2	2011-02-28	8	2011-02-28	Abia
NIE	Case-based	2011-03-01	12	6	F	R	2011-01-07	1	2011-01-10	1999-05-13	2011-01-07	2		2011-01-14	2011-01-14	2011-01-28	2	1	2011-02-28	12.5	2011-02-28	Abia
NIE	Case-based	2011-03-01	30	5	F	R	2011-01-14	0	2011-01-14		2011-01-10	2		2011-01-14	2011-01-28	2011-01-28	2	1		30.42		Abia
NIE	Case-based	2011-03-01	1	0	M	R	2011-01-05	0	2011-01-07		2011-01-02	2		2011-01-07	2011-01-07	2011-01-11	2	2		1		Abia
NIE	Case-based	2011-03-01	1	7	F	R	2011-01-19	0	2011-01-19		2011-01-15	2		2011-01-23	2011-01-25	2011-01-28	2	1	2011-02-28	1.58	2011-02-28	Abia
NIE	Case-based	2010-06-23	27	1	F	R	2010-06-02	2	2010-06-03	2006-10-09	2010-05-30	2		2010-06-06	2010-06-08	2010-06-08	2	2	2010-06-14	27.08	2010-06-14	Abia
NIE	Case-based	2010-06-23	2	6	F	U	2010-06-09	1	2010-06-10	2008-10-06	2010-06-07	2		2010-06-16	2010-06-17	2010-06-17	2	2	2010-06-18	2.5	2010-06-18	Abia
NIE	Case-based	2010-06-23	12	10	F	R	2010-06-15	1	2010-06-15	2006-10-10	2010-06-13	2		2010-06-15	2010-06-17	2010-06-17	2	2	2010-06-18	12.83	2010-06-18	Abia
NIE	Case-based	2011-03-01	6	0	F	R	2011-01-26	0	2011-01-26		2011-01-19	2		2011-01-26	2011-01-26	2011-02-11	1	4	2011-03-08	6	2011-03-08	Abia
NIE	Case-based	2011-03-01	9	0	F	R	2011-01-19	0	2011-01-19		2011-01-19	2		2011-01-19	2011-02-11	2011-02-11	2	3	2011-03-08	9	2011-03-08	Abia
NIE	Case-based	2011-03-01	2	8	M	R	2011-02-02	0	2011-02-02		2011-01-19	2		2011-02-03	2011-02-11	2011-02-11	1	4	2011-02-28	2.67	2011-02-28	Abia
NIE	Case-based	2011-03-01	0	10	F	R	2011-01-30	0	2011-01-31		2011-01-19	2		2011-02-01	2011-02-11	2011-02-11	2	2	2011-03-08	0.83	2011-03-08	Abia
NIE	Case-based	2011-03-01	11	0	M	R	2011-01-25	0	2011-01-26		2011-01-19	2		2011-01-29	2011-01-31	2011-02-11	2	2	2011-03-08	11	2011-03-08	Abia
NIE	Case-based	2011-03-01	5	0	M	R	2011-01-20	0	2011-01-20		2011-01-18	2		2011-01-21	2011-02-11	2011-02-11	2	2	2011-03-08	5	2011-03-08	Abia
NIE	Case-based	2011-03-01	12	0	F	R	2011-01-25	0	2011-01-26		2011-01-15	2		2011-01-29	2011-01-31	2011-02-11	2	2	2011-03-08	12	2011-03-08	Abia
NIE	Case-based	2011-03-01	3	9	M	R	2011-01-28	0	2011-01-29		2011-01-24	2		2011-01-29	2011-01-30	2011-02-11	2	3	2011-03-08	3.75	2011-03-08	Abia
NIE	Case-based	2011-03-01	5	11	M	R	2011-01-25	0	2011-01-30		2011-01-24	2		2011-01-30	2011-01-30	2011-02-11	2	2	2011-03-08	5.92	2011-03-08	Abia
NIE	Case-based	2011-03-01	0	4	F	R	2011-01-28	0	2011-01-29		2011-01-21	2		2011-01-30	2011-01-31	2011-02-11	2	3	2011-03-08	0.33	2011-03-08	Abia
NIE	Case-based	2011-03-01	6	0	F	R	2011-01-25	0	2011-01-26		2011-01-21	2		2011-01-29	2011-01-31	2011-02-11	2	2	2011-03-08	6	2011-03-08	Abia
NIE	Case-based	2011-03-01	8	0	M	R	2011-01-25	0	2011-01-26		2011-01-20	2		2011-01-29	2011-01-31	2011-02-11	2	2	2011-03-08	8	2011-03-08	Abia
NIE	Case-based	2011-03-01	3	0	F	R	2011-01-28	0	2011-01-29		2011-01-24	2		2011-01-29	2011-01-31		5	5		3		Abia
NIE	Case-based	2011-03-01	0	11	F	R	2011-01-31	1	2011-01-31	2011-01-13	2011-01-24	2		2011-01-31	2011-01-31	2011-02-11	1	4	2011-03-08	0.92	2011-03-08	Abia
NIE	Case-based	2011-03-01	5	0	M	R	2011-01-25	1	2011-01-26	2011-01-28	2011-01-25	2		2011-01-29	2011-01-31	2011-02-11	2	2	2011-03-08	5	2011-03-08	Abia
NIE	Case-based	2011-03-01	3	0	M	R	2011-01-25	1	2011-01-26	2011-01-28	2011-01-25	2		2011-01-29	2011-01-31	2011-02-11	1	4	2011-03-08	3	2011-03-08	Abia
NIE	Case-based	2011-03-01	4	0	M	R	2011-01-26	0	2011-01-26		2011-01-24	2		2011-01-26	2011-01-26	2011-02-11	1	4	2011-03-08	4	2011-03-08	Abia
NIE	Case-based	2010-06-30	40	0	F	R	2010-06-15	0	2010-06-17		2010-06-13	2		2010-06-22	2010-06-24	2010-06-24	2	2	2010-06-14	40	2010-06-28	Abia
NIE	Case-based	2011-03-01	3	0	M	R	2011-01-30	0	2011-01-30		2011-01-24	2		2011-01-30	2011-01-31	2011-02-11	2	1	2011-03-08	3	2011-03-08	Abia
NIE	Case-based	2011-03-01	2	7	M	R	2011-02-06	1	2011-02-07	2009-05-07	2011-02-02	2		2011-02-09	2011-02-09		5	5		2.58		Abia
NIE	Case-based	2011-03-08	3	2	F	R	2011-01-18	0	2011-01-21		2011-01-16	2	2011-01-21	2011-01-22	2011-01-28	2011-01-28	1	4	2011-02-28	3.17	2011-02-28	Abia
NIE	Case-based	2011-03-08	10	0	F	R	2011-01-22	0	2011-01-22		2011-01-18	2	2011-01-22	2011-01-25	2011-01-25	2011-01-28	2	2	2011-02-28	10	2011-02-28	Abia
NIE	Case-based	2011-03-08	6	0	M	R	2011-02-09	0	2011-02-09		2011-02-05	2	2011-02-09	2011-02-09	2011-02-11	2011-02-11	2	2	2011-03-08	6	2011-03-08	Abia
NIE	Case-based	2011-03-08	2	1	M	U	2011-02-07	1	2011-02-08	2011-01-27	2011-02-04	2	2011-02-08	2011-02-08	2011-02-08	2011-03-02	1	4	2011-06-14	2.08	2011-06-14	Abia
NIE	Case-based	2011-03-08	3	1	F	U	2011-02-07	1	2011-02-08	2009-12-09	2011-02-06	2	2011-02-08	2011-02-08	2011-02-08	2011-03-02	2	2	2011-07-01	3.08	2011-07-01	Abia
NIE	Case-based	2011-03-08	12	0	M	R	2011-01-31	0	2011-02-01		2011-01-30	2	2011-02-01	2011-02-01	2011-02-01	2011-03-02	2	5	2011-06-14	12	2011-06-14	Abia
NIE	Case-based	2011-03-08	23	0	M	R	2011-01-30	0	2011-02-01		2011-01-30	2	2011-02-01	2011-02-01	2011-03-01	2011-03-02	1	4	2011-06-14	23	2011-06-14	Abia
NIE	Case-based	2011-03-08	0	7	M	R	2011-02-07	0	2011-02-08		2011-01-30	2	2011-02-08	2011-02-08			5	5		0.58		Abia
NIE	Case-based	2011-03-08	3	0	M	R	2011-02-07	0	2011-02-08		2011-02-04	2	2011-02-08	2011-02-08			5	5		3		Abia
NIE	Case-based	2011-03-08	4	0	F	R	2011-02-07	0	2011-02-08		2011-02-04	2	2011-02-08	2011-02-08			5	5		4		Abia
NIE	Case-based	2011-03-08	3	9	M	R	2011-02-05	1	2011-02-08	2008-03-27	2011-02-03	2	2011-02-08	2011-02-09			5	5		3.75		Abia
NIE	Case-based	2011-03-08	37	11	F	R	2011-02-11	0	2011-02-11		2011-02-09	2	2011-02-11	2011-02-11		2011-11-30	2	5	2012-03-13	37.92	2012-03-13	Abia
NIE	Case-based	2011-03-08	56	0	F	R	2011-02-15	0	2011-02-15		2011-02-04	2	2011-02-15	2011-02-15	2011-02-15	2011-03-02	1	4	2011-06-14	56	2011-06-14	Abia
NIE	Case-based	2011-03-08	11	0	F	R	2011-02-16	2	2011-02-16	2008-03-08	2011-02-15	2	2011-02-16	2011-02-16	2011-02-16	2011-03-02	1	4	2011-06-14	11	2011-06-14	Abia
NIE	Case-based	2011-03-08	0	1	M	R	2011-02-16	0	2011-02-18		2011-02-10	2	2011-02-18	2011-02-21	2011-02-22	2011-03-02	2	5	2011-06-14	0.08	2011-06-14	Abia
NIE	Case-based	2011-03-08	7	8	F	R	2011-02-18	0	2011-02-21		2011-02-11	2	2011-02-21	2011-02-21	2011-02-23	2011-03-02	1	4	2011-06-14	7.67	2011-06-14	Abia
NIE	Case-based	2011-03-08	5	1	M	R	2011-02-18	0	2011-02-21		2011-02-11	2	2011-02-21	2011-02-21	2011-02-23	2011-03-02	1	4	2011-06-14	5.08	2011-06-14	Abia
NIE	Case-based	2011-03-08	14	9	F	R	2011-02-18	0	2011-02-21		2011-02-11	2	2011-02-21	2011-02-21	2011-02-23	2011-03-02	1	4	2011-06-14	14.75	2011-06-14	Abia
NIE	Case-based	2011-03-08	6	10	F	R	2011-02-17	0	2011-02-21		2011-02-15	1	2011-02-21	2011-02-21	2011-02-23	2011-03-02	1	4	2011-06-14	6.83	2011-06-14	Abia
NIE	Case-based	2011-03-08	7	2	M	R	2011-01-20	0	2011-01-21		2011-01-17	2	2011-01-21	2011-01-21	2011-01-25	2011-01-28	1	4	2011-02-28	7.17	2011-02-28	Abia
NIE	Case-based	2011-03-08	3	1	F	U	2011-02-03	1	2011-02-04	2009-10-02	2011-02-01	2	2011-02-04	2011-02-06	2011-02-08	2011-02-11	2	2	2011-03-08	3.08	2011-03-08	Abia
NIE	Case-based	2011-05-04	3	4	M	R	2011-04-12	1	2011-04-13	2008-09-25	2011-04-08	2		2011-04-13	2011-05-24	2011-05-24	2	5		3.33		Abia
NIE	Case-based	2011-05-04	0	9	M	R	2011-04-12	0	2011-04-13		2011-04-09	2		2011-04-13	2011-05-24	2011-05-24	2	5		0.75		Abia
NIE	Case-based	2011-05-04	4	0	M	R	2011-03-18	1	2011-03-21	2008-01-21	2011-03-01	2		2011-03-22	2011-04-07	2011-04-07	1	4		4		Abia
NIE	Case-based	2011-05-04	8	9	M	R	2011-03-22	2	2011-03-24	2011-02-28	2011-03-20	2		2011-03-24	2011-03-24	2011-04-07	2	1	2012-01-16	8.75	2012-01-16	Abia
NIE	Case-based	2011-05-04	5	0	F	R	2011-03-22	3	2011-03-24	2011-02-28	2011-03-20	2	2011-03-24	2011-03-24	2011-03-24	2011-04-07	5	5		5		Abia
NIE	Case-based	2011-05-04	3	10	M	R	2011-04-02	0	2011-04-02		2011-03-29	2		2011-04-03	2011-04-04	2011-05-24	1	4		3.83		Abia
NIE	Case-based	2011-05-04	12	1	F	R	2011-03-17	0	2011-03-18		2011-03-15	2	2011-03-21	2011-03-21	2011-03-21	2011-04-07	2	2	2012-01-16	12.08	2012-01-16	Abia
NIE	Case-based	2011-05-09	0	10	M	R	2011-04-29	1	2011-05-03	2011-04-06	2011-04-22	1		2011-05-03	2011-05-24	2011-05-24	1	4		0.83		Abia
NIE	Case-based	2010-07-13	4	8	M	U	2010-06-29	1	2010-06-29		2010-06-27	2		2010-06-29	2010-07-01	2010-07-02	2	2	2010-07-05	4.67	2010-07-05	Abia
NIE	Case-based	2010-07-13	0	7	M	U	2010-06-28	0	2010-06-28		2010-06-26	2		2010-06-28	2010-07-01	2010-07-02	2	2	2010-07-05	0.58	2010-07-05	Abia
NIE	Case-based	2010-07-13	1	0	F	R	2010-07-03	1	2010-07-03	2010-05-03	2010-07-01	2		2010-07-04	2010-07-12	2010-07-13	2	2	2010-07-14	1	2010-07-14	Abia
NIE	Case-based	2010-07-13	1	0	F	R	2010-06-19	0	2010-06-20		2010-06-17	2		2010-06-20	2010-06-23	2010-06-24	2	2	2010-06-28	1	2010-06-28	Abia
NIE	Case-based	2011-03-09	0	6	M	R	2011-02-02	0	2011-02-03		2011-01-31	2	2011-02-03	2011-02-04	2011-02-11	2011-02-11	2	2	2011-03-08	0.5	2011-03-08	Abia
NIE	Case-based	2011-03-09	7	0	F	R	2011-02-03	0	2011-02-03		2011-01-31	1	2011-02-03	2011-02-04	2011-02-11	2011-02-11	2	2	2011-02-28	7	2011-02-28	Abia
NIE	Case-based	2011-03-09	6	10	F	R	2011-02-01	0	2011-02-01		2011-01-30	2	2011-02-01	2011-02-11	2011-02-11	2011-02-11	1	4	2011-03-08	6.83	2011-03-08	Abia
NIE	Case-based	2011-03-09	2	2	M	R	2011-02-01	1	2011-02-02	2009-10-02	2011-01-30	2	2011-02-02	2011-02-04	2011-02-08	2011-02-11	2	2	2011-03-08	2.17	2011-03-08	Abia
NIE	Case-based	2011-03-09	8	7	M	R	2011-02-01	2	2011-02-01	2003-04-12	2011-01-30	2	2011-02-01	2011-02-02	2011-02-11	2011-02-11	2	2	2011-03-08	8.58	2011-03-08	Abia
NIE	Case-based	2011-03-09	5	9	M	R	2011-02-04	0	2011-02-07		2011-01-30	2	2011-02-07	2011-02-09	2011-02-09		5	5		5.75		Abia
NIE	Case-based	2011-03-09	1	4	F	R	2011-02-05	0	2011-02-07		2011-01-29	1	2011-02-07	2011-01-31	2011-02-11	2011-02-11	2	1	2011-03-08	1.33	2011-03-08	Abia
NIE	Case-based	2011-03-09	4	2	F	R	2011-01-28	0	2011-01-28		2011-01-27	2	2011-01-28	2011-02-01	2011-02-11	2011-02-11	2	2	2011-03-08	4.17	2011-03-08	Abia
NIE	Case-based	2011-03-09	7	1	F	R	2011-01-26	0	2011-01-26		2011-01-18	1	2011-01-26	2011-01-27	2011-01-28	2011-02-11	1	4	2011-03-08	7.08	2011-03-08	Abia
NIE	Case-based	2011-03-09	2	7	M	R	2011-01-29	0	2011-01-29		2011-01-26	2	2011-01-29	2011-02-01	2011-02-11	2011-02-11	2	2	2011-03-08	2.58	2011-03-08	Abia
NIE	Case-based	2011-03-09	3	9	M	R	2011-01-28	1	2011-01-30	2008-04-07	2011-01-26	2	2011-01-30	2011-01-30	2011-01-31	2011-02-11	2	2	2011-03-08	3.75	2011-03-08	Abia
NIE	Case-based	2011-03-09	1	7	F	R	2011-01-28	0	2011-01-29		2011-01-25	2	2011-01-29	2011-01-29	2011-01-29	2011-02-11	2	1	2011-03-08	1.58	2011-03-08	Abia
NIE	Case-based	2011-03-09	1	1	M	R	2011-01-27	1	2011-01-28	2010-09-20	2011-01-25	2	2011-01-28	2011-01-30	2011-02-02	2011-02-11	2	2	2011-03-08	1.08	2011-03-08	Abia
NIE	Case-based	2011-03-09	26	7	F	U	2011-01-12	0	2011-01-12		2011-01-08	1	2011-01-12	2011-01-12	2011-01-13	2011-01-28	2	2	2011-02-28		2011-02-28	Abia
NIE	Case-based	2011-03-09	1	0	F	U	2011-01-10	0	2011-01-10		2011-01-09	2	2011-01-10	2011-01-12	2011-01-13	2011-01-28	2	2	2011-02-28	1	2011-02-28	Abia
NIE	Case-based	2011-03-09	4	1	M	R	2011-01-06	1	2011-01-08	2007-10-01	2011-01-06	2	2011-01-08	2011-01-08	2011-01-14	2011-01-28	2	2	2011-02-28	4.08	2011-02-28	Abia
NIE	Case-based	2011-03-09	13	2	M	R	2011-01-08	3	2011-01-09	2008-08-21	2011-01-06	2	2011-01-09	2011-01-10	2011-01-14	2011-01-28	1	4	2011-02-28	13.17	2011-02-28	Abia
NIE	Case-based	2011-03-09	4	0	M	R	2011-01-12	1	2011-01-12	2007-11-24	2011-01-10	2	2011-01-12	2011-01-12	2011-01-14	2011-01-28	1	4	2011-02-28	4	2011-02-28	Abia
NIE	Case-based	2011-03-09	1	8	M	R	2011-01-12	1	2011-01-12	2010-03-01	2011-01-09	2	2011-01-12	2011-01-12	2011-01-14	2011-01-28	1	4	2011-02-28	1.67	2011-02-28	Abia
NIE	Case-based	2011-03-09	30	0	F	R	2011-01-10	0	2011-01-11		2011-01-08	2	2011-01-11	2011-01-11	2011-01-25	2011-01-28	2	2	2011-02-28	30	2011-02-28	Abia
NIE	Case-based	2011-03-09	2	8	F	R	2011-01-12	1	2011-01-12	2009-03-11	2011-01-09	2	2011-01-12	2011-01-13	2011-01-13	2011-01-28	2	3	2011-02-28	2.67	2011-02-28	Abia
NIE	Case-based	2011-03-09	23	0	F	R	2011-01-15	0	2011-01-15		2011-01-12	2	2011-01-15	2011-01-15	2011-01-25	2011-01-28	3	2	2011-02-28	23	2011-02-28	Abia
NIE	Case-based	2012-04-17	3	0	M	R	2012-04-03	0	2012-04-03		2012-03-27	2	2012-04-05	2012-04-05	2012-04-25	2012-04-25	5	5		3		Abia
NIE	Case-based	2012-04-17	9	6	F	R	2012-04-03	0	2012-04-05		2012-04-03	2	2012-04-09	2012-04-10	2012-04-18	2012-04-18	2	5	2012-05-21	9.5		Abia
NIE	Case-based	2010-07-14	22	10	F	R	2010-06-14	1	2010-06-14	1988-04-27	2010-06-06	2	2010-06-14	2010-06-21	2010-06-24	2010-06-25	2	2	2010-06-28	22.83	2010-06-28	Abia
NIE	Case-based	2010-07-14	0	5	F	R	2010-06-29	0	2010-06-29		2010-06-22	2	2010-06-29	2010-07-08	2010-07-12	2010-07-13	2	2	2010-07-14	0.42	2010-07-14	Abia
NIE	Case-based	2010-07-14	6	2	M	R	2010-07-02	1	2010-07-02	2005-01-15	2010-06-25	2	2010-07-02	2010-07-03	2010-07-12	2010-07-13	2	1	2010-07-14	6.17	2010-07-14	Abia
NIE	Case-based	2010-07-26	17	11	M	U	2010-07-12	0			2010-07-09	2		2010-07-14	2010-07-16	2010-07-16	2	2	2010-07-19	17.92	2010-07-19	Abia
NIE	Case-based	2010-08-04	40	0	F	R	2010-07-14	0	2010-07-14		2010-07-13	2		2010-07-19	2010-07-23	2010-07-23	2	2	2010-06-28	40	2010-07-27	Abia
NIE	Case-based	2010-08-04	1	5	M	R	2010-07-16	4	2010-07-16	2010-05-05	2010-07-12	2		2010-07-19	2010-07-23	2010-07-23	2	3	2010-07-27	1.42	2010-07-27	Abia
NIE	Case-based	2010-08-04	6	0	M	R	2010-07-17	1	2010-07-17	2005-04-29	2010-07-14	2	2010-07-17	2010-07-20	2010-07-23	2010-07-24	2	1	2010-07-27	6	2010-07-27	Abia
NIE	Case-based	2010-08-04	10	0	M	R	2010-07-17	0	2010-07-17		2010-07-12	2	2010-07-17	2010-07-20	2010-07-23	2010-07-24	2	1	2010-07-27	10	2010-07-27	Abia
NIE	Case-based	2010-08-04	7	2	F	R	2010-07-15	1	2010-07-16	2004-03-04	2010-07-13	2	2010-07-17	2010-07-20	2010-07-23	2010-07-24	2	3	2010-07-27	7.17	2010-07-27	Abia
NIE	Case-based	2010-08-04	2	0	F	R	2010-07-16	1	2010-07-16	2009-04-20	2010-07-13	2	2010-07-17	2010-07-20	2010-07-23	2010-07-24	1	4	2010-07-27	2	2010-07-27	Abia
NIE	Case-based	2010-08-04	4	0	F	R	2010-07-16	1	2010-07-17	2006-09-07	2010-07-10	2	2010-07-17	2010-07-20	2010-07-23	2010-07-24	1	4	2010-07-27	4	2010-07-27	Abia
NIE	Case-based	2010-08-17	10	0	F	R	2010-07-29	0	2010-07-29		2010-07-20	2	2010-07-29	2010-07-29	2010-08-02	2010-08-03	2	3	2010-08-03	10	2010-08-03	Abia
NIE	Case-based	2010-08-17	0	7	M	R	2010-07-26	0	2010-07-26		2010-07-23	2	2010-07-27	2010-07-28	2010-08-02	2010-08-03	2	3	2010-08-03	0.58	2010-08-03	Abia
NIE	Case-based	2010-08-17	0	11	F	U	2010-07-27	1	2010-07-27	2010-06-08	2010-07-22	2		2010-07-27	2010-08-03	2010-08-03	2	5	2010-08-03	0.92	2010-08-03	Abia
NIE	Case-based	2010-08-17	0	9	M	U	2010-07-26	0	2010-07-26		2010-07-23	2		2010-07-26	2010-08-03	2010-08-03	2	5	2010-08-03	0.75	2010-08-03	Abia
NIE	Case-based	2010-08-23	28	0	M	R	2010-08-07	0	2010-08-08		2010-08-05	2		2010-08-07	2010-08-11	2010-08-11	2	3	2010-08-17	28	2010-08-17	Abia
NIE	Case-based	2010-08-24	1	0	F	R	2010-08-04	1	2010-08-04	2010-05-26	2010-08-01	2	2010-08-05	2010-08-04	2010-08-11	2010-08-11	2	2	2010-09-05	1	2010-09-05	Abia
NIE	Case-based	2010-08-24	18	0	F	R	2010-08-07	0	2010-08-07	2009-12-10	2010-08-05	2		2010-08-07	2010-08-10	2010-08-11	2	2	2010-08-17	18	2010-08-17	Abia
NIE	Case-based	2010-08-24	0	7	M	R	2010-08-06	2	2010-08-06	2010-04-10	2010-08-05	2		2010-08-06	2010-08-11	2010-08-11	2	2	2010-08-17	0.58	2010-08-17	Abia
NIE	Case-based	2012-04-25	3	3	M	U	2012-03-12	1	2012-03-13	2009-09-21	2012-03-10	2	2012-03-13	2012-03-13	2012-03-13	2012-03-21	2	5	2012-03-17	3.25		Abia
NIE	Case-based	2012-04-25	1	3	F	U	2012-02-01	0	2012-02-01	2011-09-02	2012-01-25	2	2012-02-01	2012-02-01			5	5		1.25		Abia
NIE	Case-based	2012-04-25	8		F	R	2012-02-29	2	2012-02-29		2012-02-28	2	2012-03-01	2012-03-01	2012-03-03		2	5	2012-04-24		2012-04-24	Abia
NIE	Case-based	2012-04-25	1	1	F	R	2012-02-27	1	2012-02-27	2011-09-28	2012-02-25	2		2012-02-27	2012-02-29		2	5	2012-04-24	1.08	2012-04-24	Abia
NIE	Case-based	2012-04-25	0	6	M	U	2012-02-28	0	2012-02-28		2012-02-26	2	2012-02-28	2012-02-28	2012-02-28		2	5	2012-04-24	0.5	2012-04-24	Abia
NIE	Case-based	2012-04-25	9	11	M	R	2012-02-20	0	2012-02-20		2012-02-16	2	2012-02-22	2012-02-22	2012-03-07		2	5	2012-04-24	9.92	2012-04-24	Abia
NIE	Case-based	2012-04-25	2	0	F	R	2012-01-31	1	2012-01-31	2011-02-20	2012-01-30	2	2012-02-01	2012-02-01	2012-02-01		2	5	2012-04-24	2	2012-04-24	Abia
NIE	Case-based	2012-04-25	4	11	M	R	2012-03-18	1	2012-03-18	2007-11-29	2012-03-17	2	2012-03-18	2012-03-18	2012-03-18	2012-03-21	2	5	2012-05-17	4.92		Abia
NIE	Case-based	2012-04-25	14	11	F	R	2012-03-16	1	2012-03-17	1998-02-02	2012-03-09	2		2012-03-17	2012-05-17	2012-05-21	2	5	2012-05-17	14.92		Abia
NIE	Case-based	2012-04-25	20	1	M	R	2012-03-17	0	2012-03-17		2012-03-15	2	2012-03-17	2012-03-18	2012-03-18	2012-05-18	2	5	2012-05-17	20.08		Abia
NIE	Case-based	2012-04-25	10	10	F	R	2012-03-05	0	2012-03-06		2012-03-02	2	2012-03-07	2012-03-06	2012-03-07		2	5	2012-04-24	10.83	2012-04-24	Abia
NIE	Case-based	2012-04-25	4	0	M	R	2012-03-01	1	2012-03-01	2008-12-11	2012-02-29	2		2012-03-04	2012-03-04		2	5	2012-04-24	4	2012-04-24	Abia
NIE	Case-based	2012-04-25	2	7	M	R	2012-03-15	1	2012-03-15		2012-03-15	2	2012-03-16	2012-03-15	2012-03-16		2	5	2012-05-17	2.58		Abia
NIE	Case-based	2012-04-25	25	0	F	R	2012-02-28	0	2012-02-28		2012-02-27	2	2012-02-28	2012-02-28	2012-02-28		2	5	2012-04-24	25	2012-04-24	Abia
NIE	Case-based	2012-04-25	6	4	M	R	2012-03-04	0	2012-03-04	2006-09-07	2012-03-03	2	2012-03-04	2012-03-05	2012-05-05		2	5	2012-04-24	6.33	2012-04-24	Abia
NIE	Case-based	2012-04-25	2	3	F	R	2012-02-19	1	2012-02-19	2010-09-01	2012-02-17	2		2012-02-19			2	5	2012-04-19	2.25	2012-04-19	Abia
NIE	Case-based	2012-04-25	10	1	F	R	2012-02-26	1	2012-02-27	2012-02-26	2012-02-25	2	2012-03-03	2012-03-03	2012-03-07		2	5	2012-04-24	10.08	2012-04-24	Abia
NIE	Case-based	2012-04-30	12	2	F	R	2012-04-09	0	2012-04-09		2012-04-08	2	2012-04-09	2012-04-10	2012-04-25		5	5		12.17		Abia
NIE	Case-based	2012-04-30	7	11	M	R	2012-04-18	1	2012-04-19	2005-03-15	2012-04-12	2		2012-04-20			5	5		7.92		Abia
NIE	Case-based	2012-04-30	3	0	F	R	2012-04-19	1	2012-04-20	2012-04-09	2012-04-16	2	2012-04-22	2012-04-22			5	5		3		Abia
NIE	Case-based	2012-04-30	2		F	U	2012-04-03	2	2012-04-03		2012-03-30	2	2012-04-04	2012-04-03	2012-04-18	2012-04-18	2	5	2012-05-21			Abia
NIE	Case-based	2012-04-30	4	0	M	U	2012-04-03	1	2012-04-03	2008-02-02	2012-03-31	2	2012-04-03	2012-04-03	2012-04-18	2012-04-18	2	5	2012-05-21	4		Abia
NIE	Case-based	2012-04-30	2	2	M	R	2012-04-03	1	2012-04-03	2010-11-24	2012-03-25	2	2012-04-04	2012-04-04	2012-04-15	2012-04-18	2	5	2012-02-08	2.17		Abia
NIE	Case-based	2012-04-30	10	11	M	R	2012-03-16	1	2012-03-16	2001-04-07	2012-03-14	2		2012-03-19	2012-04-18	2012-04-18	2	5	2012-05-21	10.92		Abia
NIE	Case-based	2012-04-30	7	0	M	R	2012-03-19	1	2012-03-19		2012-03-18	2		2012-03-25	2012-04-18	2012-04-18	2	5	2012-05-21	7		Abia
NIE	Case-based	2010-09-06	10	0	M	R	2010-08-23	4	2010-08-23	2010-02-25	2010-08-18	2		2010-08-23	2010-08-28	2010-08-29	2	2	2010-09-06	10	2010-09-06	Abia
NIE	Case-based	2010-09-06	80	0	F	R	2010-08-07	0	2010-08-07		2010-08-01	2		2010-08-23	2010-08-23	2010-08-29	2	2	2010-09-06	80	2010-09-06	Abia
NIE	Case-based	2010-09-06	1	9	F	R	2010-08-23	4	2010-08-23	2009-04-15	2010-08-17	2		2010-08-24	2010-08-28	2010-08-29	2	2	2010-09-06	1.75	2010-09-06	Abia
NIE	Case-based	2010-09-06	12	0	F	R	2010-08-23	4	2010-08-23	2008-04-28	2010-08-20	2		2010-08-24	2010-08-29	2010-08-29	2	1	2010-09-06	12	2010-09-06	Abia
NIE	Case-based	2010-09-06	7	0	F	U	2010-08-23	1	2010-08-27	2004-05-24	2010-08-23	2	2010-08-27	2010-08-27	2010-08-27	2010-08-29	2	2	2010-09-06	7	2010-09-06	Abia
NIE	Case-based	2010-09-06	1	8	M	R	2010-08-21	4	2010-08-21	2009-09-23	2010-08-15	2		2010-08-28	2010-08-31	2010-08-31	2	5	2010-09-06	1.67	2010-09-06	Abia
NIE	Case-based	2010-09-06	4	2	M	R	2010-08-17	1	2010-08-20	2007-05-16	2010-08-17	2	2010-08-21	2010-08-21	2010-08-23	2010-08-29	2	2	2010-09-06	4.17	2010-09-06	Abia
NIE	Case-based	2010-09-06	3	4	M	R	2010-08-19	2	2010-08-19	2008-01-03	2010-08-18	2	2010-08-23	2010-08-23	2010-08-23	2010-08-23	2	5	2010-09-06	3.33	2010-09-06	Abia
NIE	Case-based	2010-09-06	5	9	F	R	2010-08-10	1	2010-08-10		2010-08-07	2		2010-08-10	2010-08-23	2010-08-23	2	1	2010-09-06	5.75	2010-09-06	Abia
NIE	Case-based	2010-09-06	1	10	M	U	2010-08-23	1	2010-08-23	2009-07-22	2010-08-21	2		2010-08-23	2010-08-29	2010-08-29	2	2	2010-09-06	1.83	2010-09-06	Abia
NIE	Case-based	2010-09-29	1	11	M	R	2010-09-01	0	2010-09-01		2010-08-30	2		2010-09-02	2010-09-06	2010-09-15	1	4	2010-10-14	1.92	2010-10-14	Abia
NIE	Case-based	2010-09-29	19	6	F	R	2010-09-22	0	2010-09-22		2010-09-19	2		2010-09-22	2010-09-23	2010-09-28	2	5	2010-10-20	19.5	2010-10-20	Abia
NIE	Case-based	2010-09-29	1	7	M	R	2010-09-05	1	2010-09-06	2009-11-22	2010-09-01	2		2010-09-06	2010-09-06	2010-09-15	2	2	2010-10-14	1.58	2010-10-14	Abia
NIE	Case-based	2010-09-29	0	11	F	R	2010-09-06	1	2010-09-07	2010-07-21	2010-09-04	2		2010-09-07	2010-09-07	2010-09-15	2	5	2010-10-14	0.92	2010-10-14	Abia
NIE	Case-based	2010-10-12	13	7	M	R	2010-09-24	1	2010-09-24	1997-04-09	2010-09-15	2	2010-09-24	2010-09-26	2010-09-29	2010-09-30	2	2	2010-10-20	13.58	2010-10-20	Abia
NIE	Case-based	2010-10-12	3	11	M	U	2010-09-15	1	2010-09-15	2008-11-18	2010-09-13	2		2010-09-15	2010-09-27	2010-09-28	2	5	2010-10-20	3.92	2010-10-20	Abia
NIE	Case-based	2010-10-12	5	9	M	R	2010-09-27	1	2010-09-28	2005-09-04	2010-09-23	2	2010-10-03	2010-10-03	2010-10-04	2010-10-05	2	5	2010-10-20	5.75	2010-10-20	Abia
NIE	Case-based	2010-10-12	12	0	F	R	2010-09-29	1	2010-09-30	2006-10-12	2010-09-28	2	2010-10-03	2010-10-03	2010-10-04	2010-10-05	3	2	2010-10-20	12	2010-10-20	Abia
NIE	Case-based	2010-03-15	0	9	F	U	2010-02-08	0	2010-02-08		2010-02-03	2		2010-02-08	2010-02-10	2010-02-10	2	2	2010-02-11	0.75	2010-02-11	Abia
NIE	Case-based	2010-03-15	0	9	F	R	2010-02-16	1	2010-02-17	2010-01-16	2010-02-15	2		2010-02-23	2010-02-24	2010-02-25	2	2	2010-03-01	0.75	2010-03-01	Abia
NIE	Case-based	2010-10-26	0	5	F	R	2010-10-06	0	2010-10-07		2010-10-05	2	2010-10-07	2010-10-08	2010-10-09	2010-10-10	1	4	2010-10-20	0.42	2010-10-20	Abia
NIE	Case-based	2010-03-15	2	0	F	R	2010-02-22	1	2010-02-22	2008-11-20	2010-02-20	2		2010-02-23	2010-02-24	2010-02-25	2	2	2010-03-01	2	2010-03-01	Abia
NIE	Case-based	2010-03-15	1	8	F	R	2010-02-08	0	2010-02-13		2010-02-07	2		2010-02-18	2010-02-20	2010-02-20	2	2	2010-02-22	1.67	2010-02-22	Abia
NIE	Case-based	2010-03-15	17	0	M	R	2010-02-20	0	2010-02-22		2010-01-20	2		2010-02-23	2010-02-24	2010-02-25	1	4	2010-03-01	17	2010-03-01	Abia
NIE	Case-based	2010-11-02	3	5	M	R	2010-09-15	1	2010-09-15	2008-10-28	2010-09-09	2		2010-10-08	2010-10-08	2010-10-14	2	5	2010-10-20	3.42	2010-10-20	Abia
NIE	Case-based	2010-11-02	60	0	F	R	2010-09-19	0	2010-10-09		2010-09-19	2		2010-10-10	2010-10-10	2010-10-14	2	2		60		Abia
NIE	Case-based	2010-11-02	0	5	M	R	2010-09-27	0	2010-09-28	1000-01-01	2010-09-20	2		2010-09-28	2010-09-29	2010-10-14	2	2	2010-10-20	0.42	2010-10-20	Abia
NIE	Case-based	2010-11-03	2	5	F	R	2010-09-25	0	2010-09-25		2010-09-21	2	2010-09-25	2010-09-25	2010-09-26	2010-10-14	1	4	2010-10-20	2.42	2010-10-20	Abia
NIE	Case-based	2010-11-03	35	0	F	R	2010-09-27	0	2010-09-27		2010-09-23	2		2010-09-27	2010-09-28	2010-10-14	2	5	2010-10-20	35	2010-10-20	Abia
NIE	Case-based	2010-11-03	0	8	F	R	2010-10-09	0	2010-10-09	1000-01-01	2010-10-05	2		2010-10-09	2010-10-10	2010-10-14	2	5	2010-10-20	0.67	2010-10-20	Abia
NIE	Case-based	2010-03-15	7	7	M	R	2010-02-21	0	2010-02-22		2010-02-11	2		2010-03-02	2010-03-05	2010-03-06	2	2	2010-03-08	7.58	2010-03-08	Abia
NIE	Case-based	2012-01-11	12	0	F	R	2011-12-19	1	2011-12-19	2006-09-22	2011-12-14	2	2011-12-19	2011-12-19	2011-12-22	2011-12-22	2	5	2012-03-13		2012-03-13	Abia
NIE	Case-based	2010-11-09	42	9	F	R	2010-10-20	0	2010-10-21	1000-01-01	2010-09-29	2		2010-10-21	2010-10-27	2010-10-27	2	2	2010-10-28	42.75	2010-10-28	Abia
NIE	Case-based	2010-11-09	9	1	M	R	2010-10-19	1	2010-10-19	2010-07-17	2010-10-16	2		2010-10-19	2010-10-27	2010-10-27	2	2	2010-10-28	9.08	2010-10-28	Abia
NIE	Case-based	2010-11-09	0	5	M	R	2010-10-24	0	2010-10-25		2010-10-23	2	2010-10-25	2010-10-25	2010-10-27	2010-10-27	2	5	2010-10-28	0.42	2010-10-28	Abia
NIE	Case-based	2010-11-09	0	5	F	R	2010-10-20	0	2010-10-25		2010-10-18	2	2010-10-25	2010-10-25	2010-10-27	2010-10-27	2	2	2010-10-28	0.42	2010-10-28	Abia
NIE	Case-based	2010-11-09	15	9	F	R	2010-10-17	1	2010-10-17	2010-10-25	2010-10-15	2		2010-10-17	2010-10-27	2010-10-27	2	3	2010-10-28	15.75	2010-10-28	Abia
NIE	Case-based	2010-11-09	0	9	F	U	2010-10-13	0	2010-10-13	1000-01-01	2010-09-20	2		2010-10-14	2010-10-27	2010-10-27	2	5	2010-10-28	0.75	2010-10-28	Abia
NIE	Case-based	2010-11-09	8	1	F	R	2010-10-12	1	2010-10-12	2003-06-04	2010-10-11	2	2010-10-21	2010-10-21	2010-10-27	2010-10-27	2	5	2010-10-28	8.08	2010-10-28	Abia
NIE	Case-based	2010-12-01	4	7	M	R	2010-11-18	0	2010-11-20		2010-11-16	2	2010-11-22	2010-11-22	2010-11-29	2010-11-29	1	4	2011-01-31	4.58	2011-01-31	Abia
NIE	Case-based	2010-12-01	5	4	M	R	2010-11-17	0	2010-11-21		2010-11-16	2	2010-11-21	2010-11-21	2010-11-29	2010-11-29	2	2	2011-01-31	5.33	2011-01-31	Abia
NIE	Case-based	2010-12-01	4	2	M	R	2010-11-19	0	2010-11-20		2010-11-18	2	2010-11-20	2010-11-22	2010-11-29	2010-11-29	1	4	2011-01-31	4.17	2011-01-31	Abia
NIE	Case-based	2010-12-07	3	7	F	R	2010-11-22	2	2010-11-24		2010-11-16	2		2010-11-24	2010-11-29	2010-11-29	2	2	2011-01-31	3.58	2011-01-31	Abia
NIE	Case-based	2010-12-07	5	11	M	R	2010-11-22	2	2010-11-24		2010-11-10	2		2010-11-24	2010-11-29	2010-11-29	2	2	2011-01-31	5.92	2011-01-31	Abia
NIE	Case-based	2010-12-07	6	1	M	R	2010-11-21	0	2010-11-22	1000-01-01	2010-11-16	2		2010-11-22	2010-11-23	2010-11-24	2	2	2011-01-31	6.08	2011-01-31	Abia
NIE	Case-based	2010-12-07	1	11	M	R	2010-11-21	0	2010-11-22		2010-10-01	2		2010-11-22	2010-11-23	2010-11-24	2	2	2011-01-31	1.92	2011-01-31	Abia
NIE	Case-based	2010-12-07	3	4	M	R	2010-11-07	1	2010-11-09	2008-08-09	2010-11-04	2	2010-11-09	2010-11-09	2010-11-29	2010-11-29	2	2	2011-01-31	3.33	2011-01-31	Abia
NIE	Case-based	2010-12-07	1	1	M	R	2010-11-03	1	2010-11-08	2010-07-11	2010-10-29	2	2010-11-09	2010-11-09	2010-11-29	2010-11-29	2	2	2011-01-31	1.08	2011-01-31	Abia
NIE	Case-based	2010-12-07	1	0	F	R	2010-11-11	1	2010-11-11	2010-09-03	2010-11-11	2	2010-11-15	2010-11-15	2010-11-29	2010-11-29	2	2	2011-01-31	1	2011-01-31	Abia
NIE	Case-based	2010-12-07	9	3	F	R	2010-11-08	1	2010-11-08		2010-11-06	2		2010-11-08	2010-11-29	2010-11-29	2	2	2011-01-31	9.25	2011-01-31	Abia
NIE	Case-based	2010-12-07	27	7	F	R	2010-11-02	0	2010-11-02		2010-11-02	2	2010-11-15	2010-11-15	2010-11-29	2010-11-29	2	2	2011-01-31	27.58	2011-01-31	Abia
NIE	Case-based	2010-12-07	12	0	F	R	2010-11-15	0	2010-11-15		2010-11-12	2		2010-11-15	2010-11-29	2010-11-29	2	2	2011-01-31	12	2011-01-31	Abia
NIE	Case-based	2010-12-07	5	5	M	U	2010-11-22	1	2010-11-22		2010-11-21	2		2010-11-23	2010-11-29	2010-11-29	2	1	2011-01-31	5.42	2011-01-31	Abia
NIE	Case-based	2010-12-07	4	3	F	R	2010-11-16	0	2010-11-22		2010-11-16	2	2010-11-22	2010-11-22	2010-11-23	2010-11-29	2	2	2011-01-31	4.25	2011-01-31	Abia
NIE	Case-based	2010-12-07	2	2	M	R	2010-11-21	0	2010-11-22		2010-11-16	2		2010-11-22	2010-11-23	2010-11-24	2	2	2011-01-31	2.17	2011-01-31	Abia
NIE	Case-based	2010-12-07	6	10	F	R	2010-11-22	0	2010-11-22	1000-01-01	2010-11-18	2		2010-11-22	2010-11-29	2010-11-29	2	2	2011-01-31	6.83	2011-01-31	Abia
NIE	Case-based	2010-12-07	4	7	M	R	2010-11-21	0	2010-11-21		2010-11-19	2		2010-11-22	2010-11-23	2010-11-24	2	2	2011-01-31	4.58	2011-01-31	Abia
NIE	Case-based	2011-01-04	2	5	M	U	2010-12-30	1	2010-12-30	2009-05-14	2010-11-28	2		2010-12-01	2010-12-05	2010-12-05	2	2	2011-02-08	2.42	2011-02-08	Abia
NIE	Case-based	2011-01-05	3	9	M	U	2010-11-20	1	2010-11-20	2007-12-11	2010-11-19	2	2010-11-25	2010-11-25	2010-11-26	2010-11-26	2	2	2011-01-31	3.75	2011-01-31	Abia
NIE	Case-based	2011-01-05	0	8	M	R	2010-11-22	0	2010-11-24		2010-11-20	2	2010-11-24	2010-11-25	2010-11-26	2010-11-26	2	2	2011-01-31	0.67	2011-01-31	Abia
NIE	Case-based	2011-01-05	0	9	M	R	2010-11-05	0	2010-11-08		2010-11-04	2	2010-11-08	2010-11-10	2010-11-11	2010-11-26	2	2	2011-01-31	0.75	2011-01-31	Abia
NIE	Case-based	2011-01-05	7	2	F	U	2010-11-21	1	2010-11-21	2004-01-26	2010-11-18	2	2010-11-25	2010-11-25	2010-11-26	2010-11-26	2	1	2011-01-31	7.17	2011-01-31	Abia
NIE	Case-based	2011-01-05	3	1	M	U	2010-11-26	0	2010-11-26		2010-11-18	2		2010-11-26	2010-11-28	2010-11-28	1	4	2011-01-31	3.08	2011-01-31	Abia
NIE	Case-based	2011-01-05	11	10	F	U	2010-11-26	0	2010-11-26		2010-11-17	2		2010-11-26	2010-11-28	2010-11-28	1	4	2011-01-31	11.83	2011-01-31	Abia
NIE	Case-based	2011-01-05	1	1	M	U	2010-11-26	0	2010-11-26		2010-11-18	2		2010-11-26	2010-11-28	2010-11-28	1	4	2011-01-31	1.08	2011-01-31	Abia
NIE	Case-based	2011-01-05	4	0	M	U	2010-11-26	1	2010-11-26	2006-09-06	2010-11-19	2	2010-11-27	2010-11-26	2010-11-28	2010-11-28	1	4	2011-01-31	4	2011-01-31	Abia
NIE	Case-based	2011-01-05	1	1	M	U	2010-11-22	0	2010-11-22		2010-11-14	2	2010-11-22	2010-11-24	2010-11-25	2010-11-25	2	5	2011-01-31	1.08	2011-01-31	Abia
NIE	Case-based	2011-01-05	3	7	F	U	2010-11-22	0	2010-11-22		2010-11-05	2	2010-11-22	2010-11-24	2010-11-25	2010-11-25	2	5	2011-01-31	3.58	2011-01-31	Abia
NIE	Case-based	2011-01-05	2	9	F	U	2010-11-26	0	2010-11-27		2010-11-12	2		2010-11-26	2010-11-28	2010-11-28	1	4	2011-01-31	2.75	2011-01-31	Abia
NIE	Case-based	2011-01-12	8	8	F	R	2010-12-10	1	2010-12-10	2003-02-14	2010-12-07	2		2010-12-11	2010-12-11	2010-12-21	2	2	2011-02-09	8.67	2011-02-09	Abia
NIE	Case-based	2011-01-12	3	9	M	R	2010-12-12	1	2010-12-12	2008-03-26	2010-12-08	2		2010-12-14	2010-12-15	2010-12-21	2	2	2011-02-09	3.75	2011-02-09	Abia
NIE	Case-based	2011-01-12	11	0	M	R	2010-12-13	2	2010-12-13	2008-03-26	2010-12-10	2		2010-12-14	2010-12-15	2010-12-21	2	2	2011-02-09	11	2011-02-09	Abia
NIE	Case-based	2011-01-12	16	0	M	R	2010-12-10	2	2010-12-10	2008-03-25	2010-12-10	2		2010-12-12	2010-12-13	2010-12-21	2	2	2011-02-09	16	2011-02-09	Abia
NIE	Case-based	2011-01-12	19	0	F	R	2010-12-04	1	2010-12-04	1991-09-30	2010-11-28	2		2010-12-05	2010-12-07	2010-12-10	2	2	2011-02-08	19	2011-02-08	Abia
NIE	Case-based	2011-01-12	23	0	F	R	2010-12-03	1	2010-12-03	1988-02-13	2010-11-30	2		2010-12-05	2010-12-07	2010-12-10	2	2		23		Abia
NIE	Case-based	2011-01-12	5	6	M	R	2010-11-28	1	2010-11-28	2007-01-23	2010-11-24	2		2010-11-29	2010-12-09	2010-12-10	2	1	2011-02-08	5.5	2011-02-08	Abia
NIE	Case-based	2011-01-12	25	9	F	R	2010-11-20	1	2010-11-20	1996-11-21	2010-11-12	2		2010-11-22	2010-12-09	2010-12-10	2	2	2011-02-08	25.75	2011-02-08	Abia
NIE	Case-based	2011-01-12	35	10	F	R	2010-11-20	0	2010-11-20		2010-11-14	2		2010-11-22	2010-12-09	2010-12-10	2	1	2011-02-08	35.83	2011-02-08	Abia
NIE	Case-based	2011-01-12	5	11	M	R	2010-11-17	2	2010-11-18	2009-06-16	2010-11-16	2		2010-11-18	2010-12-09	2010-12-10	2	1	2011-02-08	5.92	2011-02-08	Abia
NIE	Case-based	2011-01-12	5	10	M	R	2010-12-19	1	2010-12-19	2006-01-03	2010-12-17	2		2010-12-20	2010-12-21	2010-12-21	2	2	2011-02-09	5.83	2011-02-09	Abia
NIE	Case-based	2011-01-12	20	0	F	R	2010-12-17	0	2010-12-17		2010-12-15	2		2010-12-17	2010-12-17	2010-12-21	2	2	2011-02-09	20	2011-02-09	Abia
NIE	Case-based	2011-01-12	0	11	M	R	2010-11-21	0	2010-11-22	2010-11-21	2010-11-15	2		2010-11-23	2010-11-23	2010-12-21	3	2	2010-11-15	0.92	2010-11-15	Abia
NIE	Case-based	2011-01-18	4	9	M	R	2010-11-26	1	2010-11-27	2006-12-12	2010-11-26	2	2010-11-28	2010-11-28	2010-12-10	2010-12-10	2	2	2011-02-08	4.75	2011-02-08	Abia
NIE	Case-based	2011-01-18	5	1	M	R	2010-12-02	1	2010-12-02	2006-09-15	2010-12-01	2	2010-12-04	2010-12-03	2010-12-10	2010-12-10	2	2	2011-02-08	5.08	2011-02-08	Abia
NIE	Case-based	2011-04-06	24	0	F	R	2011-03-07	0	2011-03-07		2011-03-06	1		2011-03-07	2011-03-17	2011-03-18	1	4	2011-07-02	24	2011-07-02	Abia
NIE	Case-based	2011-04-06	4	10	M	R	2011-02-26	1	2011-02-27	2007-08-07	2011-02-21	2		2011-03-02	2011-03-17	2011-03-18	1	4	2011-07-02	4.83	2011-07-02	Abia
NIE	Case-based	2011-04-06	6	0	F	R	2011-03-06	1	2011-03-06	2006-01-08	2011-03-04	2		2011-03-06	2011-03-17	2011-03-18	2	1	2011-07-02	6	2011-07-02	Abia
NIE	Case-based	2011-04-06	3	5	M	R	2011-02-23	1	2011-02-26	2011-02-23	2011-02-23	2	2011-02-26	2011-02-25	2011-02-26	2011-03-02	1	4	2011-06-14	3.42	2011-06-14	Abia
NIE	Case-based	2011-04-06	5	5	M	R	2011-02-25	0	2011-02-26		2011-02-20	2	2011-02-26	2011-02-25	2011-02-26	2011-03-02	1	4	2011-06-14	5.42	2011-06-14	Abia
NIE	Case-based	2011-04-06	2	1	F	R	2011-03-15	0	2011-03-16		2011-03-07	1		2011-03-18	2011-04-06	2011-04-07	2	1		2.08		Abia
NIE	Case-based	2011-04-06	0	7	M	R	2011-03-23	0	2011-03-23		2011-03-21	2		2011-03-23	2011-04-06	2011-04-07	1	4	2011-12-01	0.58	2011-12-01	Abia
NIE	Case-based	2011-04-06	2	3	F	R	2011-03-21	0	2011-03-21		2011-03-20	2		2011-03-21	2011-03-21	2011-04-07	2	1		2.25		Abia
NIE	Case-based	2011-05-24	0	7	F	R	2011-05-09	0	2011-05-09		2011-05-07	2		2011-05-14	2011-05-24	2011-05-24	2	5		0.58		Abia
NIE	Case-based	2011-05-24	0	11	M	R	2011-05-05	0	2011-05-05		2011-05-02	2		2011-05-05	2011-05-24	2011-05-24	2	5		0.92		Abia
NIE	Case-based	2011-05-24	7	0	F	R	2011-05-05	1	2011-05-05	2011-02-23	2011-04-29	2		2011-05-05	2011-05-24	2011-05-24	2	5		7		Abia
NIE	Case-based	2011-07-06	3	2	M	R	2011-05-31	1	2011-06-03	2009-01-21	2011-05-28	2	2011-06-03	2011-06-04	2011-06-29	2011-06-29	2	5	2012-02-09	3.17	2012-02-09	Abia
NIE	Case-based	2011-06-07	12	1	F	R	2011-04-10	0	2011-04-11		2011-04-09	2		2011-04-11	2011-04-11	2011-05-24	2	1	2012-01-16	12.08	2012-01-16	Abia
NIE	Case-based	2011-09-12	4	0	M	U	2011-08-01	1	2011-08-01	2008-05-20	2011-07-30	2		2011-08-01	2011-08-17	2011-08-17	2	5	2012-03-05	4	2012-03-05	Abia
NIE	Case-based	2011-09-12	1	5	F	U	2011-07-27	1	2011-07-27	2011-03-22	2011-07-25	2		2011-07-27	2011-08-16	2011-08-17	2	5	2012-03-05	1.42	2012-03-05	Abia
NIE	Case-based	2011-06-07	15	7	F	R	2011-05-21	0	2011-05-22		2011-05-21	2		2011-05-25	2011-06-16	2011-06-16	2	5	2012-02-09	15.58	2012-02-09	Abia
NIE	Case-based	2011-06-07	5	0	F	R	2011-05-21	0	2011-05-22		2011-05-20	2		2011-05-24	2011-06-16	2011-06-16	2	5	2012-02-09	5	2012-02-09	Abia
NIE	Case-based	2011-06-07	7	1	M	R	2011-04-03	0	2011-04-04		2011-04-01	2		2011-04-04	2011-05-24	2011-05-24	2	5		7.08		Abia
NIE	Case-based	2011-06-07	0	9	F	U	2011-04-07	0	2011-04-08		2011-04-06	2		2011-04-07	2011-05-24	2011-05-24	2	5		0.75		Abia
NIE	Case-based	2011-06-07	0	6	M	U	2011-04-04	0	2011-04-08		2011-04-03	2		2011-04-08	2011-05-24	2011-05-24	1	4		0.5		Abia
NIE	Case-based	2011-06-07	7	0	F	U	2011-04-14	1	2011-04-15	2011-02-23	2011-04-13	2		2011-04-14	2011-05-24	2011-05-24	2	5		7		Abia
NIE	Case-based	2011-06-07	9	9	F	R	2011-04-17	1	2011-04-18	2008-04-24	2011-04-08	2		2011-04-18	2011-04-24	2011-04-24	2	5		9.75		Abia
NIE	Case-based	2011-06-07	33	1	F	R	2011-04-19	0	2011-04-24		2011-04-18	2		2011-04-24	2011-04-27	2011-05-24	2	5	2011-12-14	33.08	2011-12-14	Abia
NIE	Case-based	2011-06-08	4	6	F	R	2011-04-27	1	2011-04-30	2011-03-30	2011-04-24	2		2011-05-02	2011-05-03	2011-05-24	2	5	2011-12-14	4.5	2011-12-14	Abia
NIE	Case-based	2011-06-08	2	6	M	R	2011-05-11	0	2011-05-11		2011-05-08	2		2011-05-12	2011-05-24	2011-05-24	2	5		2.5		Abia
NIE	Case-based	2012-07-09	58	0	F	R	2012-06-24	2	2012-06-24	2012-02-18	2012-06-20	2	2012-06-25	2012-06-25	2012-07-10		5	5		58		Abia
NIE	Case-based	2012-07-09	5	0	F	R	2012-07-04	1	2012-07-04		2012-07-01	2	2012-07-04	2012-07-04	2012-07-10		5	5		5		Abia
NIE	Case-based	2012-07-09	53	0	F	R	2012-05-25	0	2012-05-30		2012-05-20	2	2012-06-04	2012-05-30	2012-06-04		5	5		53		Abia
NIE	Case-based	2011-07-19	9	7	F	R	2011-06-20	1	2011-06-20	2002-11-21	2011-06-19	2		2011-06-21	2011-06-21	2011-06-29	2	5	2012-02-09	9.58	2012-12-09	Abia
NIE	Case-based	2011-07-19	1	4	F	R	2011-06-20	1	2011-06-20	2010-11-20	2011-06-14	2		2011-06-21	2011-06-29	2011-06-29	2	5	2012-02-09	1.33	2010-11-20	Abia
NIE	Case-based	2011-07-19	1	3	F	R	2011-06-20	0	2011-06-23		2011-05-25	2		2011-06-23	2011-06-23	2011-06-29	2	5	2012-02-09	1.25	2012-02-09	Abia
NIE	Case-based	2011-07-19	4	10	F	R	2011-06-20	0	2011-06-23		2011-05-26	2		2011-06-23	2011-06-29	2011-06-29	2	5	2012-02-09	4.83	2012-02-09	Abia
NIE	Case-based	2011-09-28	5	3	M	R	2011-08-01	0	2011-08-01		2011-07-30	2		2011-08-01	2011-08-16	2011-08-17	2	5	2012-03-05	5.25	2012-03-05	Abia
NIE	Case-based	2011-09-28	18	0	F	R	2011-08-02	0	2011-08-03		2011-07-30	2		2011-08-04	2011-08-16	2011-08-17	2	5		18		Abia
NIE	Case-based	2011-09-28	28	11	M	R	2011-08-12	0	2011-08-12		2011-08-10	2	2011-08-12	2011-08-12	2011-09-20	2011-09-20	2	5	2012-03-05	28.92	2012-03-05	Abia
NIE	Case-based	2011-09-28	32	2	F	R	2011-08-18	0	2011-08-18		2011-08-17	2	2011-08-18	2011-08-18	2011-08-31	2011-08-31	2	5	2012-03-05	32.17	2012-03-05	Abia
NIE	Case-based	2011-09-28	4	3	F	R	2011-08-17	1	2011-08-18	2008-04-16	2011-08-14	2		2011-08-18	2011-08-31	2011-08-31	2	5	2012-03-05	4.25	2012-03-05	Abia
NIE	Case-based	2011-09-28	29	0	F	R	2011-08-21	0	2011-08-21		2011-08-19	2		2011-08-22	2011-08-31	2011-08-31	2	5	2012-03-05	29	2012-03-05	Abia
NIE	Case-based	2011-09-28	16	0	M	U	2011-08-22	0	2011-08-22		2011-08-08	2	2011-08-25	2011-08-22	2011-09-20	2011-09-20	2	5	2012-03-05	16	2012-03-05	Abia
NIE	Case-based	2011-09-28	6	0	F	U	2011-08-15	0	2011-08-22		2011-08-14	2	2011-08-25	2011-08-22	2011-09-20	2011-09-20	2	5	2012-03-05	6	2012-03-05	Abia
NIE	Case-based	2011-09-28	12	0	M	R	2011-08-26	0	2011-08-26		2011-08-25	2		2011-08-26	2011-09-19	2011-09-20	2	5	2012-03-05	12	2012-03-05	Abia
NIE	Case-based	2011-09-28	3	0	F	U	2011-08-17	0	2011-08-27		2011-08-16	2	2011-08-27	2011-08-27	2011-09-20	2011-09-20	2	5	2012-03-05	3	2012-03-05	Abia
NIE	Case-based	2011-09-28	41	9	M	U	2011-09-02	0	2011-09-06		2011-08-31	2	2011-09-07	2011-09-06	2011-09-20	2011-09-20	2	5	2012-03-05	41.75	2012-03-05	Abia
NIE	Case-based	2011-09-28	22	0	M	U	2011-09-03	0	2011-09-06		2011-08-31	2	2011-09-07	2011-09-06	2011-09-20	2011-09-20	2	5	2012-03-05	22	2012-03-05	Abia
NIE	Case-based	2011-09-28	3	3	M	R	2011-09-14	0	2011-09-14		2011-09-12	2		2011-09-14	2011-09-14	2011-09-20	2	5	2012-02-29	3.25	2012-02-29	Abia
NIE	Case-based	2011-09-28	1	0	F	U	2011-09-13	1	2011-09-14	2011-06-15	2011-09-10	2		2011-09-14	2011-09-17	2011-09-20	2	5	2012-03-05	1	2012-03-05	Abia
NIE	Case-based	2011-09-28	4	1	F	U	2011-08-12	0	2011-08-12		2011-08-10	2	2011-08-15	2011-08-12	2011-08-31	2011-08-31	2	5	2012-03-05	4.08	2012-03-05	Abia
NIE	Case-based	2011-09-28	1	0	F	U	2011-06-24	1	2011-06-26	2011-02-23	2011-06-22	2	2011-06-26	2011-06-26	2011-08-16	2011-08-16	2	5	2012-03-05	1	2012-03-05	Abia
NIE	Case-based	2011-08-10	30	8	M	R	2011-06-29	0	2011-06-29		2011-06-26	2		2011-06-29	2011-06-29	2011-07-12	1	4	2012-02-16	30.67	2012-02-16	Abia
NIE	Case-based	2011-08-10	0	11	M	R	2011-07-01	1	2011-07-01	2011-06-24	2011-06-29	2		2011-07-01	2011-07-12	2011-07-12	2	5	2012-02-16	0.92	2011-06-24	Abia
NIE	Case-based	2011-08-10	5	5	F	R	2011-07-05	1	2011-07-05	2006-12-28	2011-07-03	2		2011-07-05	2011-07-16	2011-07-16	2	5	2012-02-16	5.42	2012-02-16	Abia
NIE	Case-based	2011-08-10	9	6	M	R	2011-07-02	1	2011-07-04	2001-12-08	2011-07-02	2		2011-07-05	2011-07-12	2011-07-12	2	5	2012-02-16	9.5	2012-02-16	Abia
NIE	Case-based	2011-08-10	4	0	M	R	2011-06-13	1	2011-06-13	2011-03-23	2011-06-06	2		2011-06-14	2011-06-29	2011-06-29	2	5	2012-02-09	4	2012-02-09	Abia
NIE	Case-based	2011-08-10	2	1	F	U	2011-07-08	1	2011-07-09	2010-03-21	2011-07-07	2		2011-07-12	2011-07-15	2011-07-27	2	5	2012-03-05	2.08	2012-03-05	Abia
NIE	Case-based	2011-08-10	2	2	M	U	2011-06-18	1	2011-06-19	2010-02-12	2011-06-15	2		2011-06-20	2011-07-15	2011-07-27	1	4	2012-03-05	2.17	2012-03-05	Abia
NIE	Case-based	2011-08-10	4	0	F	R	2011-06-16	0	2011-06-16		2011-06-10	2		2011-06-16	2011-06-29	2011-06-29	2	5	2012-02-09	4	2012-02-09	Abia
NIE	Case-based	2011-08-10	2	7	M	R	2011-06-16	1	2011-06-16	2009-11-26	2011-06-08	2		2011-06-16	2011-06-26	2011-06-29	2	5	2012-02-09	2.58	2012-02-09	Abia
NIE	Case-based	2011-08-10	12	0	F	R	2011-06-14	0	2011-06-14		2011-06-08	2		2011-06-14	2011-06-29	2011-06-29	2	5	2012-02-09	12	2012-02-09	Abia
NIE	Case-based	2011-08-10	2	4	M	U	2011-06-12	1	2011-06-13	2009-12-06	2011-06-05	2		2011-06-14	2011-06-15	2011-06-15	1	4	2012-03-05	2.33	2012-03-05	Abia
NIE	Case-based	2011-08-10	2	5	F	U	2011-06-06	1	2011-06-07	2009-11-10	2011-06-04	2		2011-06-15	2011-06-18	2011-07-27	1	4	2012-03-05	2.42	2012-03-05	Abia
NIE	Case-based	2011-08-10	2	7	F	R	2011-05-24	1	2011-05-25	2009-10-05	2011-05-22	2		2011-05-26	2011-06-05	2011-07-27	1	4	2012-03-05	2.58	2012-03-05	Abia
NIE	Case-based	2011-08-10	2	3	M	U	2011-06-09	1	2011-06-10	2010-01-22	2011-06-08	2		2011-06-12	2011-06-15	2011-07-27	2	2		2.25		Abia
NIE	Case-based	2011-10-25	1	4	F	R	2011-10-11	1	2011-10-15	2011-06-20	2011-10-10	2		2011-10-17	2011-10-17	2011-10-18	2	3	2012-03-08	1.33		Abia
NIE	Case-based	2011-10-25	10	10	F	R	2011-10-15	0	2011-10-15		2011-10-14	2		2011-10-20	2011-11-02		2	5	2012-08-03	10.83	2012-08-03	Abia
NIE	Case-based	2011-10-25	19	5	F	R	2011-10-20	0	2011-10-20		2011-10-19	2		2011-10-19	2011-10-19	2011-11-02	2	2	2012-03-08	19.42		Abia
NIE	Case-based	2011-10-25	13	0	M	R	2011-10-11	0	2011-10-11		2011-10-07	2	2011-10-11	2011-10-10	2011-10-18	2011-10-18	2	5	2012-08-03	13	2012-08-03	Abia
NIE	Case-based	2011-10-25	3	1	F	R	2011-10-08	2	2011-10-09	2009-02-05	2011-09-30	2		2011-10-07	2011-10-18		2	5	2012-08-03	3.08	2012-08-03	Abia
NIE	Case-based	2011-10-25	1	0	F	R	2011-10-04	0	2011-10-07		2011-10-03	2	2011-10-11	2011-10-10	2011-10-18	2011-10-18	2	2	2012-03-08	1		Abia
NIE	Case-based	2011-10-26	13	2	F	R	2011-10-04	0	2011-10-05		2011-10-02	2	2011-10-05	2011-10-06			5	5		13.17		Abia
NIE	Case-based	2011-11-28	1	4	F	R	2011-11-16	1	2011-11-16	2011-07-06	2011-11-07	2	2011-11-16	2011-11-16	2011-11-16	2011-11-30	2	5	2012-03-13	1.33	2012-03-13	Abia
NIE	Case-based	2011-12-19	14	9	F	U	2011-11-23	2	2011-11-23	2006-10-10	2011-11-21	2		2011-11-23	2011-12-13		2	5	2012-03-13	14.75	2012-03-13	Abia
NIE	Case-based	2012-01-24	0	11	M	U	2011-10-07	0	2011-10-07		2011-10-03	2		2011-10-07	2011-10-11	2011-10-12	2	5	2012-03-05	0.92	2012-03-05	Abia
NIE	Case-based	2012-01-24	2	9	M	U	2011-10-07	1	2011-10-07	2010-01-24	2011-10-05	2		2011-10-08	2011-10-11	2011-10-11	2	5	2012-03-05	2.75	2012-03-05	Abia
NIE	Case-based	2012-01-24	18	0	F	R	2011-08-02	0	2011-08-03		2011-07-30	2		2011-08-04	2011-08-16	2011-08-16	2	5	2012-03-05	18	2012-03-05	Abia
NIE	Case-based	2012-01-24	9	0	F	R	2011-09-22	3	2011-09-22		2011-09-20	2		2011-10-11	2011-10-11	2011-10-11	2	5	2012-03-05	9	2012-03-05	Abia
NIE	Case-based	2012-01-24	5	9	F	R	2011-11-02	1	2011-11-02	2007-01-28	2011-10-31	2		2011-11-03	2011-11-09		2	5	2012-08-03	5.75	2012-08-03	Abia
NIE	Case-based	2012-01-24	3	6	M	R	2011-10-05	5	2011-10-05	2011-06-26	2011-10-05	2		2011-10-05	2011-10-11	2011-10-12	2	5	2012-03-05	3.5	2012-03-05	Abia
NIE	Case-based	2012-01-24	12	9	M	R	2011-05-21	0	2011-05-22		2011-05-05	2		2011-05-24	2011-06-16	2011-06-16	2	5	2012-02-09	12.75	2012-02-09	Abia
NIE	Case-based	2012-01-24	10	0	M	R	2011-09-15	2	2011-09-16	2008-08-20	2011-09-13	2	2011-09-16	2011-09-14	2011-10-11	2011-10-12	2	5	2012-03-05	10	2012-03-05	Abia
NIE	Case-based	2012-01-24	1	5	F	R	2011-11-01	1	2011-11-01	2011-06-02	2011-11-01	2		2011-11-01	2011-11-09	2011-11-09	2	5	2012-08-03	1.42	2012-08-03	Abia
NIE	Case-based	2012-01-24	22	0	F	R	2011-10-28	0	2011-10-30	2011-10-28	2011-10-21	2	2011-11-01	2011-10-31	2011-11-09	2011-11-09	2	5	2012-08-03	22	2012-08-03	Abia
NIE	Case-based	2012-03-06	14	0	F	R	2012-01-30	0	2012-01-31		2012-01-28	2		2012-02-10	2012-02-14	2012-04-19	2	5	2012-04-19	14		Abia
NIE	Case-based	2012-03-06	8	0	M	R	2012-01-30	1	2012-01-30		2012-01-27	2		2012-01-30	2012-02-14	2012-04-19	2	5	2012-04-19	8		Abia
NIE	Case-based	2012-03-06	2	0	M	R	2012-01-28	1	2012-01-29	2010-12-21	2012-01-26	2		2012-01-29	2012-02-14	2012-04-19	2	5	2012-04-19	2		Abia
NIE	Case-based	2012-03-06	4	4	M	R	2012-01-20	1	2012-01-21	2010-01-14	2012-01-15	2		2012-01-21	2012-02-01	2012-04-19	2	5	2012-04-19	4.33		Abia
NIE	Case-based	2012-03-06	20	0	F	R	2012-01-20	1	2012-01-23	2012-03-16	2012-01-19	2		2012-01-24	2012-01-24		2	5	2012-03-16	20		Abia
NIE	Case-based	2012-03-06	19	0	F	R	2012-02-13	1	2012-02-14		2012-02-12	2		2012-02-14	2012-02-14		2	5	2012-04-19	19	2012-04-19	Abia
NIE	Case-based	2012-03-06	3	0	F	R	2012-02-13	1	2012-02-14	2008-08-28	2012-02-13	2		2012-02-14	2012-02-14		2	5	2012-04-19	3	2012-04-19	Abia
NIE	Case-based	2012-03-06	3	0	M	R	2012-02-13	0	2012-02-14		2012-02-13	2		2012-02-14	2012-02-14		2	5	2012-04-19	3	2012-04-19	Abia
NIE	Case-based	2012-03-14	22	0	F	R	2012-03-05	0	2012-03-08		2012-02-10	2	2012-03-08	2012-03-08	2012-03-08		2	5	2012-04-24	22	2012-04-24	Abia
NIE	Case-based	2012-03-14	24	0	M	R	2012-02-03	0	2012-03-08		2012-01-29	2	2012-03-08	2012-03-08	2012-03-08		2	5	2012-04-24	24	2012-04-24	Abia
NIE	Case-based	2012-03-14	19	0	F	R	2012-03-05	0	2012-03-08		2012-02-19	2	2012-03-08	2012-03-08	2012-03-08		2	5	2012-04-24	19	2012-04-24	Abia
NIE	Case-based	2012-06-26	4	2	M	U	2012-06-25	1	2012-06-25	2012-02-10	2012-06-22	2		2012-06-25			5	5		4.17		Abia
NIE	Case-based	2012-06-26	0	8	M	U	2012-06-10	1	2012-06-11	2012-05-01	2012-06-09	2	2012-06-11	2012-06-11			5	5		0.67		Abia
NIE	Case-based	2012-06-26	7	5	F	U	2012-06-19	1	2012-06-20	2005-09-04	2012-06-18	2	2012-06-20	2012-06-22			5	5		7.42		Abia
NIE	Case-based	2012-06-26	30	0	F	R	2012-06-20	2	2012-06-20	2006-10-14	2012-06-18	2		2012-06-20			5	5		30		Abia
NIE	Case-based	2012-07-09	6	1	F	R	2012-05-29	1	2012-05-29	2007-02-11	2012-05-26	2		2012-05-29			5	5		0.08		Abia
NIE	Case-based	2012-07-09	4	2	F	R	2012-05-29	1	2012-05-29	2009-01-28	2012-05-27	2		2012-05-29			5	5		4.17		Abia
NIE	Case-based	2012-07-09	5	4	F	R	2012-05-30	1	2012-05-30	2007-11-04	2012-05-29	2		2012-05-30			5	5		5.33		Abia
NIE	Case-based	2012-07-10	12	6	M	R	2012-01-03	1	2012-01-03	2000-05-03	2012-01-02	2	2012-01-03	2012-01-03			5	5		12.5		Abia
NIE	Case-based	2012-07-10	2	1	F	U	2012-07-09	1	2012-07-09	2011-03-23	2012-07-06	2		2012-07-09			5	5		2.08		Abia
NIE	Case-based	2012-07-10	1	1	F	R	2012-07-06	1	2012-07-06	2012-05-02	2012-07-05	2	2012-07-06	2012-07-06			5	5		1.08		Abia
NIE	Case-based	2012-07-10	2	1	M	R	2012-06-25	0	2012-06-25		2012-06-19	2		2012-06-25	2012-06-27		5	5		2.08		Abia
NIE	Case-based	2012-07-10	1	3	M	R	2012-06-28	1	2012-06-28	2012-12-02	2012-06-26	2	2012-06-29	2012-06-29	2012-07-10		5	5		1.25		Abia
NIE	Case-based	2012-07-18	0	10	M	U	2012-07-05	0	2012-07-06		2012-07-02	1	2012-07-17	2012-07-16	2012-07-17		5	5		0.83		Abia
NIE	Case-based	2012-07-09	39	0	F	R	2012-06-20	0	2012-06-20		2012-05-20	2	2012-06-20	2012-06-20			5	5		39		Abia
NIE	Case-based	2012-06-27	1	0	M	R	2012-06-24	2	2012-06-25		2012-06-23	2		2012-06-25			5	5		1		Abia
NIE	Case-based	2012-06-27	1	1	F	R	2012-06-20	1	2012-06-21	2012-02-09	2012-06-20	2		2012-06-25			5	5		1.08		Abia
NIE	Case-based	2012-07-09	1	2	F	U	2012-06-04	0	2012-06-05		2012-06-01	2	2012-06-06	2012-06-06			5	5		1.17		Abia
NIE	Case-based	2012-05-29	6	0	M	R	2012-05-21	2	2012-05-21	2011-06-20	2012-05-20	2	2012-05-21	2012-05-21	2012-05-23	2012-05-23	2	5	2012-06-08	6		Abia
NIE	Case-based	2012-05-30	1	0	M	U	2012-05-17	1	2012-05-18	2012-02-13	2012-05-16	2	2012-05-18	2012-05-22			5	5		1		Abia
NIE	Case-based	2012-05-30	12	10	M	U	2012-05-08	1	2012-05-09	2000-03-03	2012-05-07	2	2012-05-10	2012-05-12			5	5		12.83		Abia
NIE	Case-based	2012-05-30	0	6	M	R	2012-05-17	0	2012-05-26		2012-05-16	1	2012-05-26	2012-05-27	2012-05-29	2012-05-30	5	5		0.5		Abia
NIE	Case-based	2012-05-30	6	11	M	R	2012-05-23	1	2012-05-24		2012-05-21	2	2012-05-24	2012-05-25			5	5		6.92		Abia
NIE	Case-based	2012-05-30	4	10	F	R	2012-05-08	0	2012-05-09		2012-05-04	2	2012-05-10	2012-05-09	2012-05-10	2012-05-23	2	5	2012-06-08	4.83		Abia
NIE	Case-based	2012-06-12	3	8	M	R	2012-06-04	1	2012-06-04		2012-05-20	2	2012-06-04	2012-06-04			5	5		3.67		Abia
NIE	Case-based	2012-06-12	6	0	M	R	2012-05-30	2	2012-05-30		2012-05-27	2	2012-05-31	2012-05-30	2012-06-12		5	5		6		Abia
NIE	Case-based	2012-06-12	4	4	F	R	2012-06-01	2	2012-06-01		2012-05-27	2	2012-06-01	2012-06-01	2012-06-12		5	5		4.33		Abia
NIE	Case-based	2012-06-12	16	11	M	R	2012-06-04	1	2012-06-04	2006-06-03	2012-06-01	2	2012-06-07	2012-06-09			5	5		16.92		Abia
NIE	Case-based	2012-06-12	3	5	M	R	2012-05-25	1	2012-06-06	2010-10-08	2012-05-24	2	2012-06-09	2012-06-07			5	5		3.42		Abia
